# Supplementary material for: Catalytic asymmetric conjugate addition of Grignard reagents to coumarins—synthesis of versatile chiral building blocks
Source: Royal Society of Chemistry journal article supplement (doi:10.1039/c0cc05160h), 2011-01-01

# Catalytic Asymmetric Conjugate Addition of Grignard Reagents to Coumarins – Synthesis of Versatile Chiral Building Blocks

Johannes F. Teichert and Ben L. Feringa\*

## Supporting Information

### 1. General

Chromatography: Merck silica gel type 9385 230-400 mesh, TLC: Merck silica gel 60,0.25 mm. Components were visualized by UV and cerium/molybdenum staining. Progress and conversion of the reaction were determined by GC-MS (GC, HP6890: MS HP5973) with an HP1 or HP5 column (Agilent Technologies, Palo Alto, CA). Mass spectra were recorded on a AEI-MS-902 mass spectrometer (EI<sup>+</sup>) or a LTQ Orbitrap XL (ESI<sup>+</sup>). <sup>1</sup>H, <sup>19</sup>F and <sup>13</sup>C NMR were recorded on a Varian AMX400 (400 and 100.59 MHz, respectively), a Varian VXR300 (300 and 75 MHz, respectively) or a Varian Gemini 200, using CDCl<sub>3</sub> as solvent. Chemical shift values are reported in ppm with the solvent resonance as the internal standard (CHCl<sub>3</sub>: δ 7.26 for <sup>1</sup>H, δ 77.0 for <sup>13</sup>C). Data are reported as follows: chemical shifts, multiplicity (s = singlet, d = doublet, t = triplet, q = quartet, br = broad, m = multiplet), coupling constants (Hz), and integration. Optical rotations were measured on a *Schmidt + Haensch* polarimeter (Polartronic MH8) with a 10 cm cell (*c* given in g/100 mL). Enantiomeric excesses (*ee* values) were determined by HPLC analysis using a Shimadzu LC-10ADVP HPLC equipped with a Shimadzu SPD-M10A/P diode array detector and chiral columns as indicated. *Ees* were determined by comparison of the racemic mixture with the corresponding chiral compounds or the mixtures of both R and S enantiomers. All reactions were carried out under a nitrogen atmosphere using oven dried glassware and using standard Schlenk techniques. CH<sub>2</sub>Cl<sub>2</sub> was dried and distilled over calcium hydride, THF and Et<sub>2</sub>O were dried and distilled over Na/benzophenone. Toluene was dried and distilled over Na. MTBE was dried and distilled over CaH<sub>2</sub>. CuBr•SMe<sub>2</sub> was purchased from Sigma-Aldrich, and used without further purification. Grignard reagents were purchased from Sigma-Aldrich (MeMgBr, EtMgBr, *n*-HexMgBr, *i*-BuMgBr), all other Grignard reagents were prepared from the corresponding bromides with Mg in Et<sub>2</sub>O. All Grignard reagents were titrated using *s*-BuOH and catalytic amounts of 1,10-phenanthroline before use. **L1** was prepared according to literature,<sup>1</sup> **L2-L5** were purchased from Sigma-Aldrich. All coumarins were commercially available, **3c** and **3d** were prepared (see below).

### 2.) Synthesis of starting materials

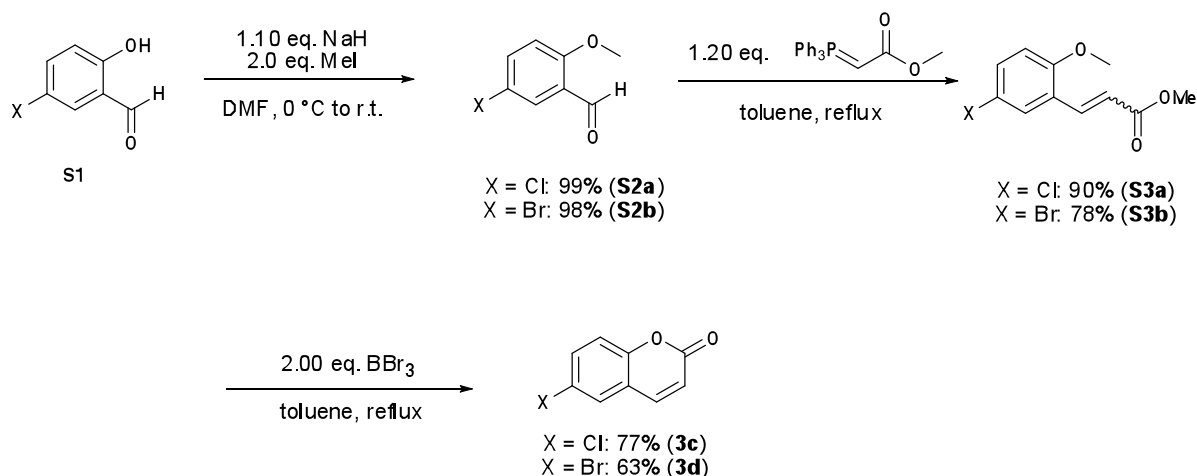

### General Procedure for the methylation of salicylic aldehydes (synthesis of S2)

The corresponding salicylic aldehyde **S1** (1.00 eq.) was dissolved in DMF (Volume: 100 mL/10 mmol) and the solution cooled to 0 °C. Then, 1.00 eq. sodium hydride (as 60% suspension in mineral oil) was added slowly and the reaction mixture was stirred for 15 min at 0 °C (or until gas evolution ceased, respectively). Then, 2.00 eq. methyl iodide was added dropwise, and the reaction mixture was allowed to warm to 21 °C. When TLC showed full consumption of the starting material, the reaction was quenched by addition of water (100 mL/10 mmol). The mixture was washed with water and brine (50 mL / 10 mmol each), extracted with EtOAc (2x 50 mL / 10 mmol) and the organic phases was dried over MgSO<sub>4</sub>. The crude product was used without further purification.

### 5-chloro-2-methoxybenzaldehyde (S2a)

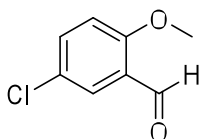

**S2a**

Following the general procedure for methylation of salicylic aldehydes, 2.167 g 5-chloro-2-methoxybenzaldehyde **S2a** (12.70 mmol, 99 % yield) was isolated as a pale yellow solid from the reaction of 5-chloro-2-hydroxybenzaldehyde (2.00 g, 12.77 mmol) with methyl iodide (1.597 ml, 25.5 mmol).

<sup>1</sup>H NMR: (400 MHz, CDCl<sub>3</sub>) δ 10.30 (s, 1H), 7.64 (s, 1H), 7.46 – 7.34 (m, 1H), 6.87 (d, *J* = 8.8 Hz, 1H), 3.84 (s, 3H).

<sup>13</sup>C NMR: (101 MHz, CDCl<sub>3</sub>) δ 188.12, 160.07, 135.16, 127.53, 126.00, 125.37, 113.18, 55.79.

HR-MS: (ESI<sup>+</sup>) calculated for C<sub>8</sub>H<sub>8</sub>ClO<sub>2</sub> [M+H<sup>+</sup>]: 171.0207, found: 171.0204.

### 5-bromo-2-methoxybenzaldehyde (S2b)

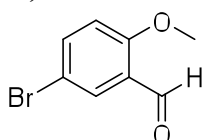

**S2b**

Following the general procedure for methylation of salicylic aldehydes, 2.097 g 5-bromo-2-methoxybenzaldehyde **S2b** (9.75 mmol, 98 % yield) was isolated as a pale yellow solid from the reaction of 5-bromo-2-hydroxybenzaldehyde (2.00 g, 9.95 mmol) with methyl iodide (1.244 ml, 19.90 mmol).

<sup>1</sup>H NMR: (201 MHz, CDCl<sub>3</sub>) δ 10.31 (s, 1H), 7.83 (d, *J* = 2.6 Hz, 1H), 7.56 (dd, *J* = 8.9, 2.6 Hz, 1H), 6.84 (d, *J* = 8.9 Hz, 1H), 3.86 (s, 3H).

<sup>13</sup>C NMR: (50 MHz, CDCl<sub>3</sub>) δ 188.13, 160.57, 138.12, 130.70, 125.83, 113.63, 113.19, 55.82.

HR-MS: (ESI<sup>+</sup>) calculated for C<sub>8</sub>H<sub>8</sub>BrO<sub>2</sub> [M+H<sup>+</sup>]: 214.9702, found: 214.9696.

**General procedure for the Wittig reaction of methyl 2-(triphenylphosphoranylidene)acetate with salicylic aldehydes**

Salicylic aldehyde **S2** (1.00 eq.) was dissolved in toluene (Volume: 50 mL/ 10 mmol ), and 1.20 eq. methyl 2-(triphenylphosphoranylidene)acetate was added to the mixture. This was heated to 110 °C until TLC showed full conversion of the starting material. After cooling, diethylether (50 mL/10 mmol) was added to precipitate any triphenylphosphine oxide, which was subsequently filtered off. All volatiles were removed under reduced pressure to give the crude products, which were purified by column chromatography (SiO<sub>2</sub>, pentane/EtOAc 8:2) to yield **S3** as a mixture of E/Z isomers.

#### Methyl 3-(5-chloro-2-methoxyphenyl)acrylate (**S3a**)

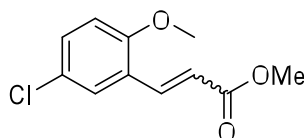

**S3a**

Following the general procedure for the Wittig reaction with salicylic aldehydes, 2.384 g methyl 3-(5-chloro-2-methoxyphenyl)acrylate **S3a** (10.52 mmol, 90 % yield) was isolated as a white solid from the reaction of 5-chloro-2-methoxybenzaldehyde **S2a** (2.00 g, 11.72 mmol) with methyl 2-(triphenylphosphoranylidene)acetate (4.70 g, 14.07 mmol). (*R*<sub>f</sub> = 0.80 in pentane/EtOAc 8:2).

<sup>1</sup>H NMR: (400 MHz, CDCl<sub>3</sub>) δ 7.86 (d, *J* = 16.2 Hz, 1H), 7.41 (d, *J* = 2.6 Hz, 1H), 7.23 (dd, *J* = 8.9, 2.6 Hz, 1H), 6.79 (d, *J* = 8.8 Hz, 1H), 6.45 (d, *J* = 16.2 Hz, 1H), 3.81 (s, 3H), 3.77 (s, 3H).

<sup>13</sup>C NMR: (101 MHz, CDCl<sub>3</sub>) δ 167.25, 156.61, 138.50, 130.70, 129.68, 127.97, 125.57, 124.64, 119.30, 112.28, 55.62, 51.50.

HR-MS: (ESI<sup>+</sup>) calculated for C<sub>11</sub>H<sub>12</sub>ClO<sub>3</sub> [M+H<sup>+</sup>]: 227.0470, found: 227.0465.

#### Methyl 3-(5-bromo-2-methoxyphenyl)acrylate (**S3b**)

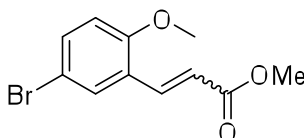

**S3b**

Following the general procedure for the Wittig reaction with salicylic aldehydes, 1.977 g methyl 3-(5-bromo-2-methoxyphenyl)acrylate **S3b** (7.29 mmol, 78 % yield) was isolated as a white solid from the reaction of 5-bromo-2-methoxybenzaldehyde **S2b** (2.00 g, 9.30 mmol) with methyl 2-(triphenylphosphoranylidene)acetate (3.73 g, 11.16 mmol). (*R*<sub>f</sub> = 0.65 in pentane/EtOAc 8:2).

<sup>1</sup>H NMR: (201 MHz, CDCl<sub>3</sub>) δ 7.87 (d, *J* = 16.2 Hz, 1H), 7.57 (d, *J* = 2.5 Hz, 1H), 7.39 (dd, *J* = 8.8, 2.5 Hz, 1H), 6.76 (d, *J* = 8.8 Hz, 1H), 6.46 (d, *J* = 16.2 Hz, 1H), 3.83 (s, 3H), 3.78 (s, 3H).

<sup>13</sup>C NMR: (50 MHz, CDCl<sub>3</sub>) δ 167.32, 157.14, 138.52, 138.49, 133.68, 130.99, 125.20, 119.39, 112.85, 112.78, 55.66, 51.61.

HR-MS: (ESI<sup>+</sup>) calculated for C<sub>11</sub>H<sub>12</sub>BrO<sub>3</sub> [M+H<sup>+</sup>]: 270.9964, found: 270.9969.

### General procedure for the synthesis of coumarin derivatives **3c**, **3d** from methyl acrylates

According to a modified literature procedure,<sup>2</sup> 1.00 eq. methyl acrylate **S3** was dissolved in toluene (Volume: 50 mL / 5 mmol) and the mixture cooled to 0 °C. Then, 2.00 eq. boron tribromide was added dropwise. The reaction mixture was heated to 110 °C for 4h. After cooling to room temperature, water (50 mL / 5 mmol) was added and the aqueous layer was extracted twice with CHCl<sub>3</sub> (30 mL / 5 mmol). After drying over MgSO<sub>4</sub> and removal of all volatiles under reduced pressure, the crude mixture was purified by column chromatography (SiO<sub>2</sub>, pentane/EtOAc 8:2) to yield the desired coumarins **3c** or **3d**.

#### 6-chloro-2H-chromen-2-one (**3c**)

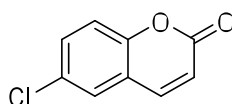

**3c**

Following the general procedure for the synthesis of coumarin derivatives from esters, 0.613 g 6-chloro-2H-chromen-2-one **3c** (3.40 mmol, 77 % yield) was isolated as a pale yellow solid from the reaction of methyl 3-(5-chloro-2-methoxyphenyl)acrylate **S3a** (1.00 g, 4.41 mmol) with boron tribromide (0.834 ml, 8.82 mmol). (*R*<sub>f</sub> = 0.75 in pentane/EtOAc 8:2).

<sup>1</sup>H NMR: (201 MHz, CDCl<sub>3</sub>) δ 7.63 (d, *J* = 9.6 Hz, 1H), 7.44 (dt, *J* = 4.9, 2.3 Hz, 2H), 7.30 – 7.18 (m, 1H), 6.44 (d, *J* = 9.6 Hz, 1H).

<sup>13</sup>C NMR: (50 MHz, CDCl<sub>3</sub>) δ 159.94, 152.32, 142.15, 131.65, 129.58, 127.05, 119.72, 118.20, 117.74.

HR-MS: (ESI<sup>+</sup>) calculated for C<sub>9</sub>H<sub>6</sub>ClO<sub>2</sub> [M+H<sup>+</sup>]: 181.0051, found: 181.0051.

#### 6-bromo-2H-chromen-2-one (**3d**)

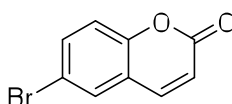

**3d**

Following the general procedure for the synthesis of coumarin derivatives from esters, 0.522 g 6-bromo-2H-chromen-2-one **3d** (2.320 mmol, 63 % yield) was isolated as an orange solid from the reaction of methyl 3-(5-bromo-2-methoxyphenyl)acrylate **S3b** (1.00 g, 3.69 mmol) with boron tribromide (0.697 ml, 7.38 mmol). (*R*<sub>f</sub> = 0.90 in pentane/EtOAc 8:2).

<sup>1</sup>H NMR: (201 MHz, CDCl<sub>3</sub>) δ 7.68 – 7.55 (m, 3H), 7.29 – 7.15 (m, 1H), 6.45 (d, *J* = 9.6 Hz, 1H).

<sup>13</sup>C NMR: (50 MHz, CDCl<sub>3</sub>) δ 164.90, 159.88, 142.04, 134.54, 130.13, 120.28, 118.60, 117.83, 116.94.

HR-MS: (ESI<sup>+</sup>) calculated for C<sub>9</sub>H<sub>6</sub>BrO<sub>2</sub> [M+H<sup>+</sup>]: 224.9546, found: 224.9548.

### 3. General Procedure for the asymmetric Cu-catalyzed conjugate addition of Grignard reagents to Coumarins



Copper Bromide dimethyl sulfide complex (5.0 mol %) and 5.5 mol % (R,S<sub>Fe</sub>)-reverse Josiphos (**L4**) were dissolved in MTBE (Volume: 15 mL / 1 mmol substrate) and the mixture was stirred at room temperature for 15 min. Then, the mixture was cooled to -72 °C and subsequently 2.5 eq. of the appropriate Grignard reagent was added. The mixture stirred for and additional 10 min at -72 °C. Then, a solution of 1.00 eq. of the appropriate coumarin **1** or **3** in MTBE (Volume: 5 mL / 1 mmol) was added dropwise over a period of 1 h. The reaction mixture was stirred until TLC showed full conversion. Then, the reaction was quenched by adding HCl solution in Et<sub>2</sub>O (2.0 mL / 1 mmol substrate) at -72 °C. Then, 20 mL / 1 mmol saturated aqueous NH<sub>4</sub>Cl solution was added at low temperature and the reaction mixture was allowed to warm to room temperature. Then, it was diluted with Et<sub>2</sub>O (30 mL / 1 mmol). After washing two times with aqueous saturated NH<sub>4</sub>Cl solution (2x 50 mL / 1 mmol) and reextraction of the aqueous layer with Et<sub>2</sub>O (20 mL / 1 mmol), the combined organic layers were dried over MgSO<sub>4</sub>. All volatiles were removed under reduced pressure to give the crude product, which was purified by column chromatography (SiO<sub>2</sub>, EtOAc/Pentane) to yield **2** or **4**.

#### General Procedure for the synthesis of racemic products of the Cu-catalyzed conjugate addition to Coumarins

1.00 eq. of the appropriate coumarin (0.485 mmol) and 30.0 mol % copper bromide dimethyl sulfide complex (0.030 g, 0.145 mmol) and 60.0 mol % triphenylphosphine (0.076 g, 0.291 mmol) were dissolved in MTBE (Volume: 15 mL), cooled to -40 °C and stirred for 10 min. Then, 2.50 eq. of the appropriate Grignard reagent (1.212 mmol) was added dropwise. The reaction mixture was stirred overnight at -40 °C. Then, the reaction was quenched by addition of 2.0 mL HCl in Et<sub>2</sub>O (2N). Then, 20 mL saturated aqueous NH<sub>4</sub>Cl solution was added at low temperature and the reaction mixture was allowed to warm to room temperature. Then, it was diluted with Et<sub>2</sub>O (30 mL). After washing two times with aqueous saturated NH<sub>4</sub>Cl solution (2x 50 mL) and reextraction of the aqueous layer with Et<sub>2</sub>O (20 mL), the combined organic layers were dried over MgSO<sub>4</sub>. All volatiles were removed under reduced pressure to give the crude product, which was purified by column chromatography (SiO<sub>2</sub>, EtOAc/Pentane) to yield the desired compounds.

#### (R)-4-ethylchroman-2-one (**2a**)

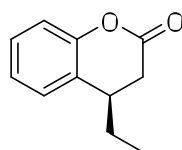

**2a**

Following the general procedure for the asymmetric Cu-catalyzed conjugate addition, 0.135 g (R)-4-ethylchroman-2-one **2a** (0.768 mmol, 96% yield) was isolated as a pale yellow oil from the reaction of 2H-chromen-2-one **1** (0.117 g, 0.8 mmol) with ethylmagnesium bromide solution (3.0 molar in Et<sub>2</sub>O) (0.67 mL, 2.00 mmol). The desired product was purified by column chromatography (SiO<sub>2</sub>, pentane/EtOAc 10:1, R<sub>f</sub> = 0.68 in pentane/EtOAc 10:1, 95% ee).

<sup>1</sup>H NMR: (400 MHz, CDCl<sub>3</sub>) δ 7.29 – 7.21 (m, 1H), 7.21 – 7.15 (m, 1H), 7.11 (dd, *J* = 10.7, 4.2 Hz, 1H), 7.04 (d, *J* = 8.1 Hz, 1H), 2.96 – 2.86 (m, 1H), 2.78 (qd, *J* = 15.8, 4.9 Hz, 2H), 1.64 (tdd, *J* = 14.0, 11.3, 6.2 Hz, 3H), 0.95 (t, *J* = 7.4 Hz, 3H).

$^{13}\text{C}$  NMR: (101 MHz,  $\text{CDCl}_3$ )  $\delta$  168.48, 151.22, 128.17, 127.84, 126.42, 124.20, 117.00, 36.52, 34.35, 27.50, 11.11.

HR-MS: ( $\text{ESI}^+$ ) calculated for  $\text{C}_{11}\text{H}_{12}\text{O}_2\text{Na}$  [ $\text{M}+\text{Na}^+$ ]: 199.0730, found: 199.0730.

$[\alpha]_{\text{D}}^{20} = 53.6$  ( $c = 1.0$  in  $\text{CHCl}_3$ )

$[\alpha]_{\text{D}}^{20} = 114.6$  ( $c = 1.0$  in  $\text{C}_6\text{H}_6$ )

The two  $[\alpha]_{\text{D}}^{20}$  values have been used for determination of the absolute configuration by comparison with literature data.<sup>3,4</sup>

*ee* determination by chiral HPLC (Chiralpak AD: n-heptane/2-propanol 95:5, 40 °C isotherm, 220 nm), retention times: 8.3 min (major), 8.9 min (minor).

### (R)-4-hexylchroman-2-one (2c)

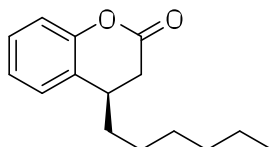

**2c**

Following the general procedure for the asymmetric Cu-catalyzed conjugate addition, 0.177 g (R)-4-hexylchroman-2-one **2c** (0.760 mmol, 95 % yield) was isolated as a pale yellow solid from the reaction of 2H-chromen-2-one **1** (0.117 g, 0.8 mmol) with n-hexylmagnesium bromide solution (2.0 molar in  $\text{Et}_2\text{O}$ ) (1.00 ml, 2.00 mmol). The desired product was purified by column chromatography ( $\text{SiO}_2$ , pentane/EtOAc 10:1,  $R_f = 0.78$  in pentane/EtOAc 10:1, 99% *ee*).

$^1\text{H}$  NMR: (201 MHz,  $\text{CDCl}_3$ )  $\delta$  7.30 – 6.95 (m, 4H), 3.04 – 2.87 (m, 1H), 2.81 – 2.61 (m, 2H), 1.66 – 1.45 (m, 2H), 1.44 – 1.02 (m, 8H), 0.84 (t,  $J = 6.4$  Hz, 3H).

$^{13}\text{C}$  NMR: (50 MHz,  $\text{CDCl}_3$ )  $\delta$  168.26, 151.09, 127.99, 127.65, 126.72, 124.10, 116.85, 34.94, 34.54, 34.47, 31.47, 28.94, 26.44, 22.41, 13.88.

HR-MS: ( $\text{ESI}^+$ ) calculated for  $\text{C}_{15}\text{H}_{20}\text{O}_2\text{Na}$  [ $\text{M}+\text{Na}^+$ ]: 255.1356, found: 255.1356.

$[\alpha]_{\text{D}}^{20} = 47.6$  ( $c = 1.0$  in  $\text{CHCl}_3$ )

*ee* determination by chiral HPLC (Chiralpak OB-H: n-heptane/2-propanol 95:5, 40 °C isotherm, 210 nm), retention times: 10.5 min (minor), 12.4 min (major).

### (S)-4-isopropylchroman-2-one (2d)

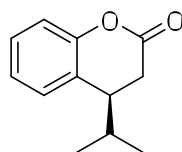

**2d**

Following the general procedure for the asymmetric Cu-catalyzed conjugate addition, 0.145 g (S)-4-isopropylchroman-2-one **2d** (0.760 mmol, 95 % yield) was isolated as a pale yellow oil from the reaction of 2H-chromen-2-one **1** (0.117 g, 0.8 mmol) with isopropylmagnesium bromide solution (1.5 molar in  $\text{Et}_2\text{O}$ ) (1.33 ml, 2.00 mmol). The desired product was purified by column chromatography ( $\text{SiO}_2$ , pentane/EtOAc 10:1,  $R_f = 0.90$  in pentane/EtOAc 10:1, 63% *ee*).

$^1\text{H}$  NMR: (400 MHz,  $\text{CDCl}_3$ )  $\delta$  7.27 – 7.19 (m, 1H), 7.14 (dd,  $J = 7.5, 1.5$  Hz, 1H), 7.11 – 7.04 (m, 1H), 7.01 (d,  $J = 8.1$  Hz, 1H), 2.85 (dd,  $J = 10.7, 8.9$  Hz, 1H), 2.78 – 2.63 (m, 2H), 1.82 (dd,  $J = 13.5, 6.7$  Hz, 1H), 0.93 (d,  $J = 6.8$  Hz, 3H), 0.88 (d,  $J = 6.8$  Hz, 3H).

$^{13}\text{C}$  NMR: (101 MHz,  $\text{CDCl}_3$ )  $\delta$  168.65, 151.46, 128.84, 128.09, 125.30, 123.87, 116.81, 41.61, 32.05, 31.96, 20.00, 19.00.

HR-MS: ( $\text{ESI}^+$ ) calculated for  $\text{C}_{12}\text{H}_{15}\text{O}_2$  [ $\text{M}+\text{H}^+$ ]: 191.1067, found: 191.1066.

$[\alpha]_{\text{D}}^{20} = 21.6$  ( $c = 1.0$  in  $\text{CHCl}_3$ )

*ee* determination by chiral HPLC (Chiralpak OB-H: *n*-heptane/2-propanol 98:2, 40 °C isotherm, 210 nm), retention times: 15.5 min (major), 17.2 min (minor).

### (R)-4-isobutylchroman-2-one (2e)

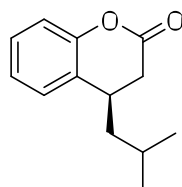

**2e**

Following the general procedure for the asymmetric Cu-catalyzed conjugate addition, 0.118 g (R)-4-isobutylchroman-2-one **2e** (0.576 mmol, 72 % yield) was isolated as a pale yellow solid from the reaction of 2H-chromen-2-one **1** (0.117 g, 0.8 mmol) with isobutylmagnesium bromide solution (2.0 molar in  $\text{Et}_2\text{O}$ ) (1.00 ml, 2.00 mmol). The desired product was purified by column chromatography ( $\text{SiO}_2$ , pentane/EtOAc 10:1,  $R_f = 0.78$  in pentane/EtOAc 10:1, 93% *ee*).

$^1\text{H}$  NMR: (400 MHz,  $\text{CDCl}_3$ )  $\delta$  7.29 – 7.20 (m, 1H), 7.20 – 7.15 (m, 1H), 7.09 (t,  $J = 7.4$  Hz, 1H), 7.04 (d,  $J = 8.1$  Hz, 1H), 3.07 (dd,  $J = 5.3, 3.9$  Hz, 1H), 2.76 (ddd,  $J = 19.5, 15.8, 4.7$  Hz, 2H), 1.63 (dt,  $J = 13.4, 6.7$  Hz, 1H), 1.42 (dtd,  $J = 21.2, 13.9, 7.5$  Hz, 2H), 0.98 (d,  $J = 6.5$  Hz, 3H), 0.89 (d,  $J = 6.6$  Hz, 3H).

$^{13}\text{C}$  NMR: (101 MHz,  $\text{CDCl}_3$ )  $\delta$  168.34, 151.20, 128.12, 127.48, 127.17, 124.25, 117.09, 43.62, 34.69, 32.76, 24.84, 22.59, 22.22.

HR-MS: ( $\text{ESI}^+$ ) calculated for  $\text{C}_{13}\text{H}_{17}\text{O}_2$  [ $\text{M}+\text{H}^+$ ]: 205.1223, found: 205.1223.

$[\alpha]_{\text{D}}^{20} = 72.0$  ( $c = 1.0$  in  $\text{CHCl}_3$ )

*ee* determination by chiral HPLC (Chiralpak OB-H: *n*-heptane/2-propanol 98:2, 40 °C isotherm, 210 nm), retention times: 13.8 min (major), 15.4 min (minor).

### (R)-4-(but-3-enyl)chroman-2-one (2f)

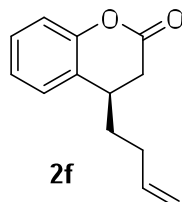

**2f**

Following the general procedure for the asymmetric Cu-catalyzed conjugate addition, 0.106 g (R)-4-(but-3-en-1-yl)-3,4-dihydronaphthalen-2(1H)-one **2f** (0.528 mmol, 66 % yield) was isolated as a pale yellow oil from the reaction of 2H-chromen-2-one **1** (0.117 g, 0.8 mmol) with butenylmagnesium bromide solution (2.38 molar in  $\text{Et}_2\text{O}$ ) (0.84 ml, 2.00 mmol). The desired product was purified by column chromatography ( $\text{SiO}_2$ , pentane/EtOAc 10:1,  $R_f = 0.85$  in pentane/EtOAc 10:1, 93% *ee*).

$^1\text{H}$  NMR: (201 MHz,  $\text{CDCl}_3$ )  $\delta$  7.38 – 6.93 (m, 4H), 5.93 – 5.62 (m, 1H), 5.24 – 4.83 (m, 2H), 3.10 – 2.93 (m, 1H), 2.91 – 2.61 (m, 2H), 2.25 – 1.95 (m, 2H), 1.79 – 1.55 (m, 2H).

$^{13}\text{C}$  NMR: (50 MHz,  $\text{CDCl}_3$ )  $\delta$  168.20, 151.23, 137.18, 128.27, 127.76, 126.42, 124.26, 117.09, 115.61, 34.57, 34.28, 33.51, 30.54.

HR-MS: ( $\text{ESI}^+$ ) calculated for  $\text{C}_{13}\text{H}_{14}\text{O}_2\text{Na}$  [ $\text{M}+\text{Na}^+$ ]: 225.0886, found: 225.0884.

$[\alpha]_{\text{D}}^{20} = 72.6$  ( $c = 1.0$  in  $\text{CHCl}_3$ )

*ee* determination by chiral HPLC (Chiralpak OD-H: *n*-heptane/2-propanol 99:1, 40 °C isotherm, 210 nm), retention times: 20.4 min (minor), 21.6 min (major).

### (R)-4-phenethylchroman-2-one (2g)

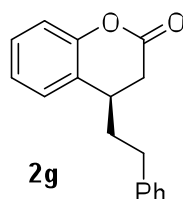

Following the general procedure for the asymmetric Cu-catalyzed conjugate addition, 0.126 g (R)-4-phenethylchroman-2-one **2g** (0.499 mmol, 73% yield) was isolated as an orange solid from the reaction of 2H-chromen-2-one **1** (0.117 g, 0.8 mmol) with phenylethylmagnesium bromide solution (1.50 molar in  $\text{Et}_2\text{O}$ ) (1.14 ml, 2.00 mmol). The desired product was purified by column chromatography ( $\text{SiO}_2$ , pentane/ $\text{EtOAc}$  10:1,  $R_f = 0.65$  in pentane/ $\text{EtOAc}$  10:1, 94% *ee*).

$^1\text{H}$  NMR: (400 MHz,  $\text{CDCl}_3$ )  $\delta$  7.36 – 7.26 (m, 3H), 7.25 – 7.04 (m, 6H), 3.11 – 2.98 (m, 1H), 2.90 – 2.80 (m, 2H), 2.79 – 2.58 (m, 2H), 2.04 – 1.85 (m, 2H).

$^{13}\text{C}$  NMR: (101 MHz,  $\text{CDCl}_3$ )  $\delta$  168.06, 151.17, 140.68, 128.39, 128.25, 128.14, 127.68, 126.30, 126.01, 124.23, 117.02, 35.86, 34.48, 34.35, 32.56.

HR-MS: ( $\text{ESI}^+$ ) calculated for  $\text{C}_{17}\text{H}_{16}\text{O}_2\text{Na}$  [ $\text{M}+\text{Na}^+$ ]: 275.1043, found: 275.1042.

$[\alpha]_{\text{D}}^{20} = 57.0$  ( $c = 1.0$  in  $\text{CHCl}_3$ )

*ee* determination by chiral HPLC (Chiralpak AD: *n*-heptane/2-propanol 95:5, 40 °C isotherm, 210 nm), retention times: 8.3 min (minor), 9.0 min (major).

### (R)-4-(4-chlorobutyl)chroman-2-one (2h)

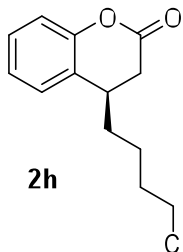

Following the general procedure for the asymmetric Cu-catalyzed conjugate addition, 0.075 g (R)-4-(4-chlorobutyl)chroman-2-one **2h** (0.315 mmol, 46 % yield) was isolated as a yellow oil from the reaction of 2H-chromen-2-one **1** (0.117 g, 0.8 mmol) with (4-chlorobutyl)magnesium bromide solution (2.30 molar in  $\text{Et}_2\text{O}$ ) (0.744 ml, 2.00 mmol). The desired product was purified by column chromatography ( $\text{SiO}_2$ , pentane/ $\text{EtOAc}$  10:1,  $R_f = 0.65$  in pentane/ $\text{EtOAc}$  10:1, 98% *ee*).

The product contains traces of dehalogenated product.

$^1\text{H}$  NMR: (400 MHz,  $\text{CDCl}_3$ )  $\delta$  7.31 – 7.23 (m, 1H), 7.18 (dd,  $J$  = 7.5, 1.5 Hz, 1H), 7.11 (td,  $J$  = 7.4, 1.1 Hz, 1H), 7.06 (d,  $J$  = 8.1 Hz, 1H), 3.52 (dt,  $J$  = 6.5, 5.1 Hz, 2H), 2.99 (dd,  $J$  = 5.8, 3.8 Hz, 1H), 2.80 (ddd,  $J$  = 19.7, 15.9, 4.8 Hz, 2H), 1.77 (ddd,  $J$  = 7.7, 6.1, 3.7 Hz, 2H), 1.68 – 1.52 (m, 4H).

$^{13}\text{C}$  NMR: (101 MHz,  $\text{CDCl}_3$ )  $\delta$  168.20, 151.21, 128.39, 127.79, 126.33, 124.35, 117.18, 44.58, 35.10, 34.75, 33.87, 32.25, 24.05.

HR-MS: ( $\text{ESI}^+$ ) calculated for  $\text{C}_{13}\text{H}_{16}\text{O}_2$  [ $\text{M}+\text{H}^+$ ]: 239.0833, found: 239.0842.

$[\alpha]_{\text{D}}^{20}$  = 84.6 ( $c$  = 1.0 in  $\text{CHCl}_3$ )

*ee* determination by chiral HPLC (Chiralpak OD-H: *n*-heptane/2-propanol 98:2, 40 °C isotherm, 210 nm), retention times: 26.0 min (major), 27.0 min (minor).

#### (R)-4-ethyl-6-methylchroman-2-one (4a)

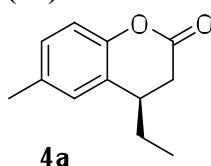

Following the general procedure for the asymmetric Cu-catalyzed conjugate addition, 0.140 g (R)-4-ethyl-6-methylchroman-2-one **4a** (0.736 mmol, 92 % yield) was isolated as a pale yellow oil from the reaction of 6-methyl-2H-chromen-2-one **3a** (0.128 g, 0.8 mmol) with ethylmagnesium bromide solution (3.00 molar in  $\text{Et}_2\text{O}$ ) (0.67 ml, 2.00 mmol). The desired product was purified by column chromatography ( $\text{SiO}_2$ , pentane/EtOAc 10:1,  $R_f$  = 0.85 in pentane/EtOAc 10:1, 94% *ee*).

$^1\text{H}$  NMR: (201 MHz,  $\text{CDCl}_3$ )  $\delta$  7.09 – 6.85 (m, 3H), 2.90 – 2.78 (m, 1H), 2.77 – 2.61 (m, 2H), 2.30 (s, 3H), 1.70 – 1.44 (m, 2H), 0.93 (t,  $J$  = 7.4 Hz, 3H).

$^{13}\text{C}$  NMR: (50 MHz,  $\text{CDCl}_3$ )  $\delta$  168.51, 149.05, 133.63, 128.50, 128.15, 126.03, 116.53, 36.42, 34.26, 27.43, 20.59, 11.00.

HR-MS: ( $\text{ESI}^+$ ) calculated for  $\text{C}_{12}\text{H}_{15}\text{O}_2$  [ $\text{M}+\text{H}^+$ ]: 191.1067, found: 191.1067.

$[\alpha]_{\text{D}}^{20}$  = 19.0 ( $c$  = 1.0 in  $\text{CHCl}_3$ )

*ee* determination by chiral HPLC (Chiralpak OJ-H: *n*-heptane/2-propanol 98:2, 40 °C isotherm, 210 nm), retention times: 15.8 min (major), 17.3 min (minor).

#### (R)-4-ethyl-7-methylchroman-2-one (4b)

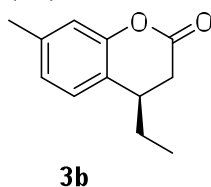

Following the general procedure for the asymmetric Cu-catalyzed conjugate addition, 0.141 g (R)-4-ethyl-7-methylchroman-2-one **4b** (0.741 mmol, 93 % yield) was isolated as a pale yellow oil from the reaction of 7-methyl-2H-chromen-2-one **3b** (0.128 g, 0.8 mmol) with ethylmagnesium bromide solution (3.00 molar in  $\text{Et}_2\text{O}$ ) (0.67 ml, 2.00 mmol). The desired product was purified by column chromatography ( $\text{SiO}_2$ , pentane/EtOAc 10:1,  $R_f$  = 0.70 in pentane/EtOAc 10:1, 97% *ee*).

$^1\text{H}$  NMR: (400 MHz,  $\text{CDCl}_3$ )  $\delta$  7.04 (d,  $J = 7.7$  Hz, 1H), 6.90 (dd,  $J = 7.7, 0.8$  Hz, 1H), 6.84 (s, 1H), 2.89 – 2.81 (m, 1H), 2.74 (qd,  $J = 15.7, 4.9$  Hz, 2H), 2.31 (s, 3H), 1.59 (qt,  $J = 13.9, 7.2$  Hz, 2H), 0.93 (t,  $J = 7.4$  Hz, 3H).

$^{13}\text{C}$  NMR: (101 MHz,  $\text{CDCl}_3$ )  $\delta$  168.54, 151.05, 138.28, 127.47, 124.84, 123.22, 117.30, 36.09, 34.45, 27.50, 20.89, 11.00.

HR-MS: ( $\text{ESI}^+$ ) calculated for  $\text{C}_{12}\text{H}_{15}\text{O}_2$  [ $\text{M}+\text{H}^+$ ]: 191.1067, found: 191.1062.

$[\alpha]_{\text{D}}^{20} = 37.0$  ( $c = 1.0$  in  $\text{CHCl}_3$ )

*ee* determination by chiral HPLC (Chiralpak OJ-H: *n*-heptane/2-propanol 98:2, 40 °C isotherm, 210 nm), retention times: 16.9 min (major), 18.2 min (minor).

#### (R)-6-chloro-4-ethylchroman-2-one (4c)

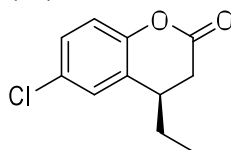

**4c**

Following the general procedure for the asymmetric Cu-catalyzed conjugate addition, 0.135 g (R)-6-chloro-4-ethylchroman-2-one **4c** (0.641 mmol, 80 % yield) was isolated as an orange oil from the reaction of 6-chloro-2H-chromen-2-one **3c** (0.144 g, 0.8 mmol), which was added as a solution in 7 mL MTBE/ $\text{CH}_2\text{Cl}_2$  (5:2), with ethylmagnesium bromide solution (3.00 molar in  $\text{Et}_2\text{O}$ ) (0.67 mL, 2.00 mmol). The desired product was purified by column chromatography ( $\text{SiO}_2$ , pentane/ $\text{EtOAc}$  10:1,  $R_f = 0.55$  in pentane/ $\text{EtOAc}$  10:1, 95% *ee*).

$^1\text{H}$  NMR: (300 MHz,  $\text{CDCl}_3$ )  $\delta$  7.24 – 7.11 (m, 2H), 6.95 (d,  $J = 8.5$  Hz, 1H), 2.93 – 2.83 (m, 1H), 2.82 – 2.66 (m, 2H), 1.73 – 1.47 (m, 2H), 0.94 (t,  $J = 7.4$  Hz, 3H).

$^{13}\text{C}$  NMR: (75 MHz,  $\text{CDCl}_3$ )  $\delta$  167.55, 149.73, 129.16, 128.09, 127.57, 118.27, 97.86, 36.36, 33.81, 27.23, 10.91.

HR-MS: ( $\text{ESI}^+$ ) calculated for  $\text{C}_{11}\text{H}_{12}\text{ClO}_2$  [ $\text{M}+\text{H}^+$ ]: 211.0520, found: 211.0517.

$[\alpha]_{\text{D}}^{20} = 16.8$  ( $c = 1.0$  in  $\text{CHCl}_3$ )

*ee* determination by chiral HPLC (Chiralpak OB-H: *n*-heptane/2-propanol 98:2, 40 °C isotherm, 210 nm), retention times: 27.0 min (major), 33.1 min (minor).

#### (R)-6-bromo-4-ethylchroman-2-one (4d)

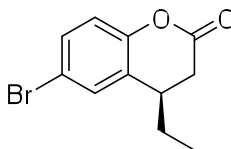

**4d**

Following the general procedure for the asymmetric Cu-catalyzed conjugate addition, 0.175 g (R)-6-bromo-4-ethylchroman-2-one **4d** (0.686 mmol, 86 % yield) was isolated as a yellow oil from the reaction of 6-bromo-2H-chromen-2-one **3d** (0.180 g, 0.8 mmol), which was added as a solution in 8 mL MTBE/ $\text{CH}_2\text{Cl}_2$  (5:3), with ethylmagnesium bromide solution (3.00 molar in  $\text{Et}_2\text{O}$ ) (0.67 mL, 2.00 mmol). The desired product was purified by column chromatography ( $\text{SiO}_2$ , pentane/ $\text{EtOAc}$  10:1,  $R_f = 0.55$  in pentane/ $\text{EtOAc}$  10:1, 96% *ee*).

$^1\text{H}$  NMR: (300 MHz,  $\text{CDCl}_3$ )  $\delta$  7.41 – 7.23 (m, 2H), 6.90 (d,  $J = 8.5$  Hz, 1H), 2.94 – 2.81 (m, 1H), 2.81 – 2.61 (m, 2H), 1.60 (td,  $J = 14.5, 7.0$  Hz, 2H), 0.94 (t,  $J = 7.4$  Hz, 3H).

$^{13}\text{C}$  NMR: (50 MHz,  $\text{CDCl}_3$ )  $\delta$  167.44, 150.25, 131.04, 130.48, 128.54, 118.67, 116.68, 36.31, 33.80, 27.26, 10.93.

HR-MS: ( $\text{ESI}^+$ ) calculated for  $\text{C}_{11}\text{H}_{12}\text{BrO}_2$  [ $\text{M}+\text{H}^+$ ]: 255.0015, found: 255.0010.

$[\alpha]_{\text{D}}^{20} = 5.40$  ( $c = 1.0$  in  $\text{CHCl}_3$ )

*ee* determination by chiral HPLC (Chiralpak OB-H: *n*-heptane/2-propanol 98:2, 40 °C isotherm, 210 nm), retention times: 24.1 min (major), 28.4 min (minor).

#### (R)-4-ethyl-6,7-dimethoxychroman-2-one (4e)

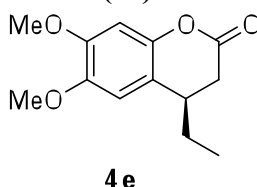

Following the general procedure for the asymmetric Cu-catalyzed conjugate addition, 0.063 g (R)-4-ethyl-6,7-dimethoxychroman-2-one **4e** (0.267 mmol, 55 % yield) was isolated as a brown oil from the reaction of 6,7-dimethoxy-2H-chromen-2-one **3e** (0.100 g, 0.485 mmol), which was added as a solution in 5.0 mL MTBE/ $\text{CH}_2\text{Cl}_2$  (1:1), with ethylmagnesium bromide solution (3.00 molar in  $\text{Et}_2\text{O}$ ) (0.404 mL, 2.00 mmol). The desired product was purified by column chromatography ( $\text{SiO}_2$ , pentane/EtOAc 8:2,  $R_f = 0.50$  in pentane/EtOAc 8:2, 64% *ee*).

$^1\text{H}$  NMR: (201 MHz,  $\text{CDCl}_3$ )  $\delta$  6.63 (s, 1H), 6.60 (s, 1H), 3.85 (d,  $J = 3.3$  Hz, 6H), 2.88 – 2.63 (m, 3H), 1.60 (dd,  $J = 13.2, 6.6$  Hz, 2H), 0.95 (t,  $J = 7.4$  Hz, 3H).

$^{13}\text{C}$  NMR: (50 MHz,  $\text{CDCl}_3$ )  $\delta$  168.56, 148.72, 145.46, 145.00, 117.27, 110.41, 101.28, 56.41, 56.07, 36.34, 34.49, 27.80, 11.12.

HR-MS: ( $\text{ESI}^+$ ) calculated for  $\text{C}_{13}\text{H}_{17}\text{O}_4$  [ $\text{M}+\text{H}^+$ ]: 237.1121, found: 237.1118.

$[\alpha]_{\text{D}}^{20} = 20.8$  ( $c = 1.0$  in  $\text{CHCl}_3$ )

*ee* determination by chiral HPLC (Chiralpak AD-H: *n*-heptane/2-propanol 98:2, 40 °C isotherm, 210 nm), retention times: 32.0 min (major), 44.1 min (minor).

#### (R)-4-ethyl-5,7-dimethoxychroman-2-one (4f)

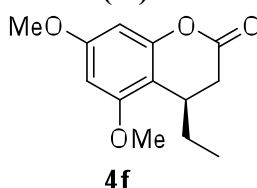

Following the general procedure for the asymmetric Cu-catalyzed conjugate addition, 0.125 g (R)-4-ethyl-5,7-dimethoxychroman-2-one **4f** (0.528 mmol, 66 % yield) was isolated as a pale yellow solid from the reaction of 5,7-dimethoxy-2H-chromen-2-one **3f** (0.165 g, 0.8 mmol), which was added as a solution in 5.0 mL MTBE/ $\text{CH}_2\text{Cl}_2$  (1:1), with ethylmagnesium bromide solution (3.00 molar in  $\text{Et}_2\text{O}$ ) (0.667 mL, 2.00 mmol). The desired product was purified by column chromatography ( $\text{SiO}_2$ , pentane/EtOAc 8:2,  $R_f = 0.75$  in pentane/EtOAc 8:2, 48% *ee*).

$^1\text{H}$  NMR: (201 MHz,  $\text{CDCl}_3$ )  $\delta$  6.22 (dd,  $J = 7.8, 2.3$  Hz, 2H), 3.78 (d,  $J = 6.2$  Hz, 6H), 3.30 – 3.08 (m, 1H), 2.71 (qd,  $J = 15.9, 4.1$  Hz, 2H), 1.66 – 1.33 (m, 2H), 0.89 (t,  $J = 7.4$  Hz, 3H).

$^{13}\text{C}$  NMR: (50 MHz,  $\text{CDCl}_3$ )  $\delta$  168.64, 159.96, 157.28, 152.52, 107.63, 94.69, 93.82, 55.53, 55.42, 33.82, 30.22, 27.30, 11.03.

HR-MS: ( $\text{ESI}^+$ ) calculated for  $\text{C}_{13}\text{H}_{17}\text{O}_4$  [ $\text{M}+\text{H}^+$ ]: 237.1121, found: 237.1121.

$[\alpha]_{\text{D}}^{20} = 10.6$  ( $c = 1.0$  in  $\text{CHCl}_3$ )

*ee* determination by chiral HPLC (Chiralpak OJ-H: *n*-heptane/2-propanol 95:5, 40 °C isotherm, 210 nm), retention times: 24.0 min (major), 27.4 min (minor).

### (*R*)-ethyl 3-(2-hydroxyphenyl)pentanoate (**6**)

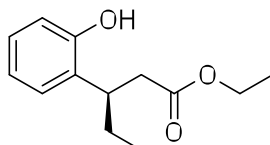

**6**

In a flame-dried Schlenk tube, 2.5 mol% copper bromide dimethyl sulfide complex (4.11 mg, 0.020 mmol) and 3.0 mol% reverse Josiphos **L4** (0.014 g, 0.024 mmol) were dissolved in MTBE (Volume: 10.0 ml) and the mixture was stirred at room temperature for 15 min. Then, the mixture was cooled to -72 °C and 2.5 eq. ethylmagnesium bromide solution (*c* = 3.0 molar, 0.800 ml, 2.4 mmol) were added and the mixture stirred for 10 more min. Then, a solution of 1.00 eq. 2H-chromen-2-one **1** (0.117 g, 0.8 mmol) in MTBE (Volume: 5.0 ml) was added dropwise over a period of 1 h. The reaction was stirred until TLC showed full conversion to the 1,4-addition product (~2 h). Then, 5.00 eq. ethanol (0.234 ml, 4.00 mmol) were added and the reaction mixture was warmed to room temperature and stirred at that temperature for 5 h. Then, the reaction was quenched by adding saturated NH<sub>4</sub>Cl solution (50 mL) and the reaction mixture was diluted with Et<sub>2</sub>O (50 mL). After separation of the organic phase it was dried over MgSO<sub>4</sub> and all volatiles were removed under reduced pressure to give the crude product as a yellow oil. This was further purified by column chromatography (SiO<sub>2</sub>, pentane/EtOAc 10:1, *R<sub>f</sub>* = 0.55 in pentane/EtOAc 10:1, 95% *ee*) to yield (*R*)-ethyl-3-(2-hydroxyphenyl)pentanoate **6** (0.154 g, 0.693 mmol, 87 %) as a colourless oil.

<sup>1</sup>H NMR: (201 MHz, CDCl<sub>3</sub>) δ 7.19 – 6.98 (m, 3H), 6.96 – 6.82 (m, 2H), 4.30 – 3.91 (m, 2H), 3.36 (dtd, *J* = 13.1, 7.6, 5.3 Hz, 1H), 2.70 (qd, *J* = 16.4, 7.3 Hz, 2H), 1.89 – 1.59 (m, 2H), 1.18 (t, *J* = 7.22 Hz, 3H), 0.84 (t, *J* = 7.3 Hz, 3H).

<sup>13</sup>C NMR: (50 MHz, CDCl<sub>3</sub>) δ 174.74, 154.14, 130.49, 127.22, 120.78, 117.03, 60.86, 40.90, 35.98, 27.77, 13.92, 12.02.

HR-MS: (ESI<sup>+</sup>) calculated for C<sub>13</sub>H<sub>18</sub>O<sub>3</sub>Na [*M*+Na<sup>+</sup>]: 245.1148, found: 245.1149.

[α]<sub>D</sub><sup>20</sup> = -2.0 (*c* = 1.0 in CHCl<sub>3</sub>)

*ee* determination by chiral HPLC (Chiralpak AD-H: *n*-heptane/2-propanol 99:1, 40 °C isotherm, 210 nm), retention times: 76.2 min (minor), 80.0 min (major).

### (*R*)-3-(2-hydroxyphenyl)-*N*-propylpentanamide (**7**)

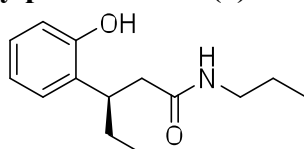

**7**

In a flame-dried Schlenk tube, 2.5 mol% copper bromide dimethyl sulfide complex (4.11 mg, 0.020 mmol) and 3.0 mol% reverse Josiphos **L4** (0.014 g, 0.024 mmol) were dissolved in MTBE (Volume: 10.0 ml) and the mixture stirred at room temperature for 15 min. The mixture was cooled to -72 °C and 2.5 eq. ethylmagnesium bromide solution (*c* = 3.0 molar, 0.800 ml, 2.4 mmol) were added and the mixture stirred for 10 more min. Next, a solution of



1.00 eq. 2H-chromen-2-one **1** (0.117 g, 0.8 mmol) in MTBE (Volume: 5.0 ml) was added dropwise over a period of 1 h. The reaction was stirred until TLC showed full conversion to the 1,4-addition product (~2 h). Then, 5.00 eq. propan-1-amine (0.329 ml, 4.00 mmol) were added and the reaction mixture was warmed up to room temperature and stirred at that temperature for 16 h. The reaction was quenched by adding saturated NH<sub>4</sub>Cl solution (50 mL) and the reaction mixture was diluted with Et<sub>2</sub>O (50 mL). After separation of the organic phase it was dried over MgSO<sub>4</sub> and all volatiles were removed under reduced pressure to give the crude product as a yellow oil. This was further purified by column chromatography (SiO<sub>2</sub>, pentane/EtOAc 1:1, R<sub>f</sub> = 0.60 in pentane/EtOAc 1:1, 96% *ee*) to yield (R)-3-(2-hydroxyphenyl)-N-propylpentanamide **7** (0.154 g, 0.656 mmol, 82 %) as a colourless oil.

<sup>1</sup>H NMR: (400 MHz, CDCl<sub>3</sub>) δ 8.71 (s (br), 1H), 7.12 – 7.02 (m, 2H), 6.94 – 6.83 (m, 2H), 6.26 (s (br), 1H), 3.34 (dd, *J* = 11.5, 7.3 Hz, 1H), 3.07 (dd, *J* = 13.3, 6.7 Hz, 2H), 2.65 (dd, *J* = 15.3, 4.3 Hz, 1H), 2.45 (dd, *J* = 15.3, 10.2 Hz, 1H), 1.72 (td, *J* = 14.2, 6.5 Hz, 2H), 1.48 – 1.28 (m, 2H), 0.81 (t, *J* = 7.3 Hz, 3H), 0.75 (t, *J* = 7.4 Hz, 3H).

<sup>13</sup>C NMR: (101 MHz, CDCl<sub>3</sub>) δ 173.76, 154.50, 130.74, 127.19, 127.01, 120.50, 117.24, 43.32, 41.32, 36.21, 27.77, 22.33, 12.15, 11.03.

HR-MS: (ESI<sup>+</sup>) calculated for C<sub>14</sub>H<sub>22</sub>NO<sub>2</sub> [M+H<sup>+</sup>]: 236.1645, found: 236.1644.

[α]<sub>D</sub><sup>20</sup> = -38.4 (c = 1.0 in CHCl<sub>3</sub>)

*ee* determination by chiral HPLC (Chiralpak AB-H: n-heptane/2-propanol 95:5, 40 °C isotherm, 210 nm), retention times: 25.9 min (minor), 32.4 min (major).

### (3S,4R)-4-ethyl-3-(hydroxy(phenyl)methyl)chroman-2-one (**8**)

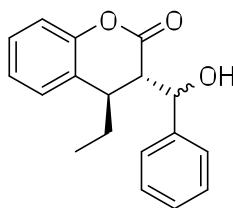

**8**

In a flame-dried Schlenk tube, 2.5 mol% copper bromide dimethyl sulfide complex (4.11 mg, 0.020 mmol) and 3.0 mol% reverse Josiphos **L4** (0.014 g, 0.024 mmol) were dissolved in MTBE (Volume: 10.0 ml) and stirred at room temperature for 15 min. The mixture was cooled to -72 °C and 2.5 eq. ethylmagnesium bromide solution (c = 3.0 molar, 0.800 ml, 2.4 mmol) were added and the mixture stirred for 10 more min. A solution of 1.00 eq. 2H-chromen-2-one **1** (0.117 g, 0.8 mmol) in MTBE (Volume: 5.0 ml) was added dropwise over a period of 1 h. The reaction was stirred until TLC showed full conversion to the 1,4-addition product (~2 h). Then, 5.00 eq. benzaldehyde (0.405 ml, 4.00 mmol) were added and the reaction mixture was warmed up to room temperature and stirred at that temperature for 4 h. Then, the reaction was quenched by adding saturated aq. NH<sub>4</sub>Cl solution (50 mL) and the reaction mixture was diluted with Et<sub>2</sub>O (50 mL). After separation of the organic phase it was dried over MgSO<sub>4</sub> and all volatiles were removed under reduced pressure to give the crude product as a yellow oil. This was further purified by column chromatography (SiO<sub>2</sub>, toluene/MeOH 30:1, R<sub>f</sub> = 0.45 (major), 0.35 (minor) in toluene/MeOH 30:1) to yield (3S,4R)-4-ethyl-3-(hydroxy(phenyl)methyl)chroman-2-one **8** (0.176 g, 0.624 mmol, 78 %) as a colourless oil.

Product **8** was isolated as a mixture of 2 diastereomers (ratio 3:1), signals are assigned where resolved.

<sup>1</sup>H NMR: (201 MHz, CDCl<sub>3</sub>) δ 7.48 – 6.92 (m, 9H, major + minor), 4.59 (d, *J* = 9.4 Hz, 1H, major), 4.43 (d, *J* = 10.0 Hz, 1H, minor), 3.27 – 3.03 (m, 2H, major + minor), 2.73 (s (br), 1H, major + minor), 2.24 (t, *J* = 7.3 Hz, 1H, minor), 1.49 (qd, *J* = 14.4, 7.3 Hz, 2H, major + minor), 0.90 (t, *J* = 7.3 Hz, 3H, major), 0.77 (t, *J* = 7.3 Hz, 3H, minor).

<sup>13</sup>C NMR: (50 MHz, CDCl<sub>3</sub>) δ 168.46 (minor), 167.92 (major), 150.48 (minor), 150.45 (major), 140.77 (major), 140.47 (minor), 129.22, 128.87 (minor), 128.83 (major), 128.61 (major), 128.55 (minor), 128.36, 128.31 (minor), 128.26 (major), 128.09, 127.38, 126.80, 126.34, 125.89, 124.87, 124.32 (minor), 124.26 (major), 116.64 (minor), 116.34 (major), 72.58 (major), 64.91 (minor), 53.93 (major), 53.29 (minor), 39.70 (minor), 39.07 (major), 28.59 (major), 28.18 (minor), 11.07 (major), 10.87 (minor).

HR-MS: (ESI<sup>+</sup>) calculated for C<sub>18</sub>H<sub>18</sub>O<sub>3</sub>Na [M+Na<sup>+</sup>]: 305.1148, found: 305.1149.

[α]<sub>D</sub><sup>20</sup> = 72.4 (c = 1.0 in CHCl<sub>3</sub>)

#### 4. References

1. Smith, C. R.; Mans, D. J.; RajanBabu, T. V. *Org. Synth.* **2008** 85, 238.
2. Dubuffet, T.; Loutz, A.; Lavielle, G. *Synth. Commun.* **1999**, 29, 929-936.
3. Meyers, A. I.; Whitten, C. E. *Tetrahedron Lett.* **1976**, 1947-1950.
4. Stephan, E.; Rocher, R.; Aubouet, J.; Pourcelot, G.; Cresson, P. *Tetrahedron: Asymmetry* **1994**, 5, 41-44.

## **5. NMR spectra and HPLC traces**

# **5-chloro-2-methoxybenzaldehyde (S2a)**

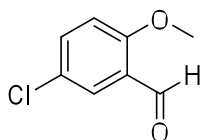

**S2 a**

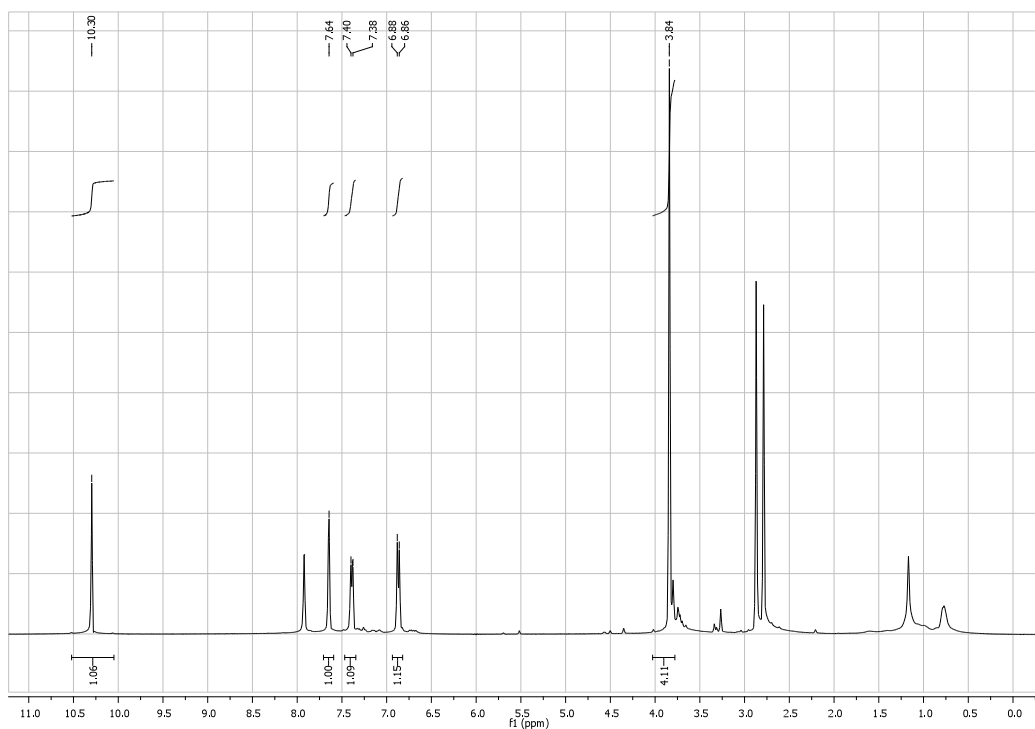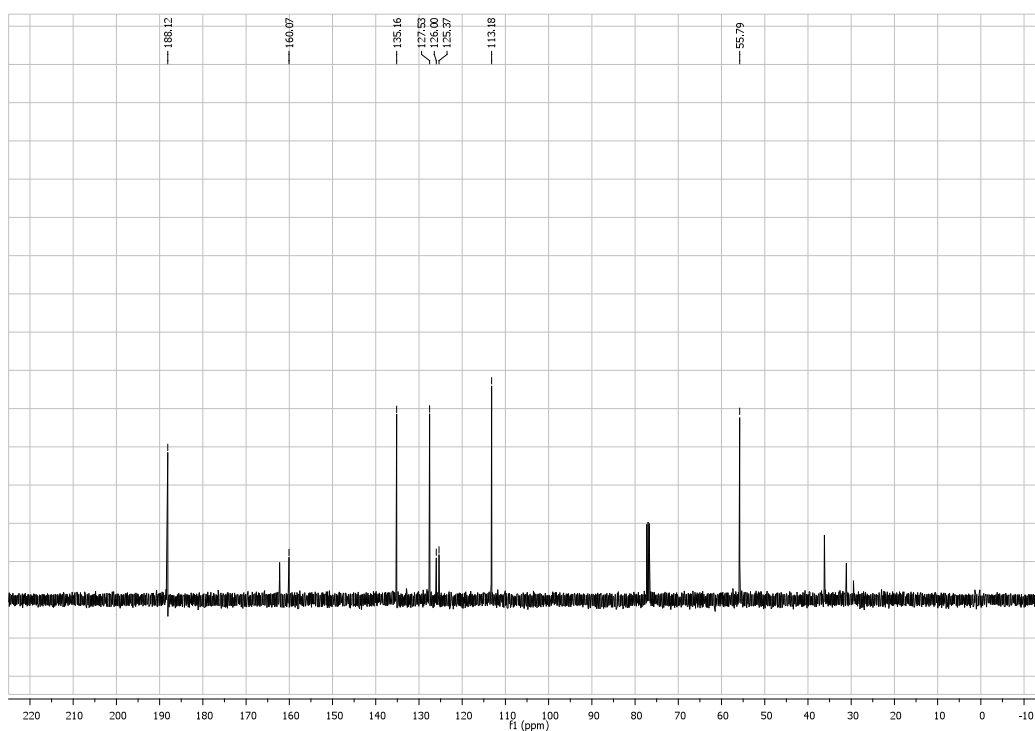

# 5-bromo-2-methoxybenzaldehyde (S2b)

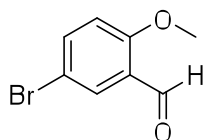

**S2b**

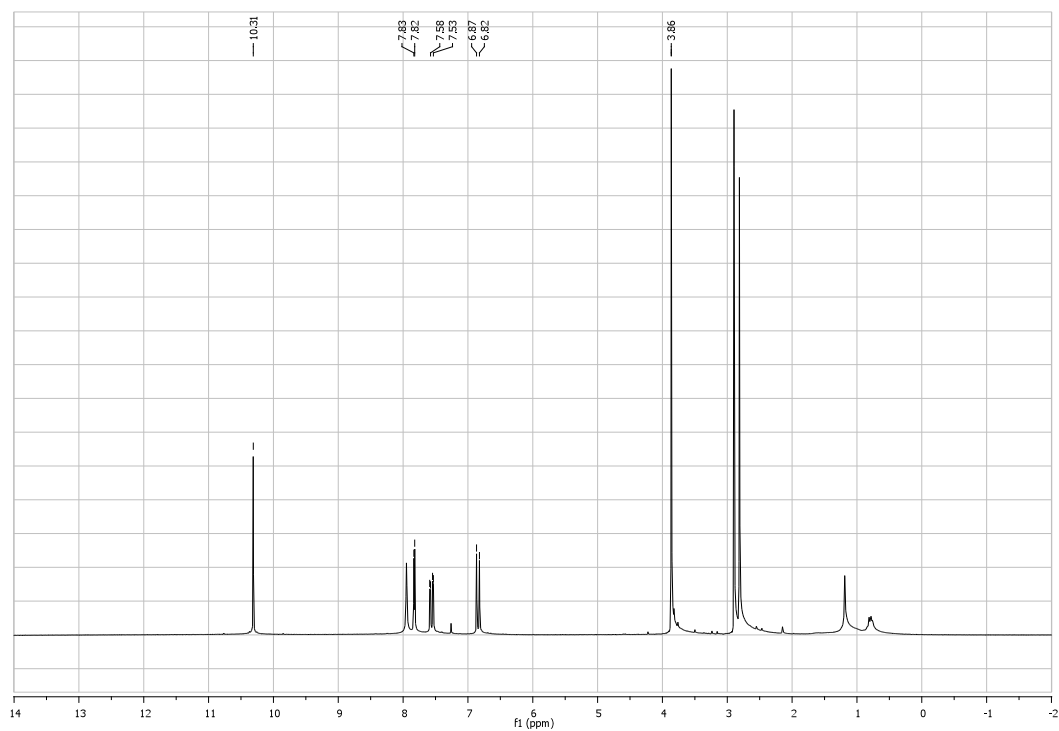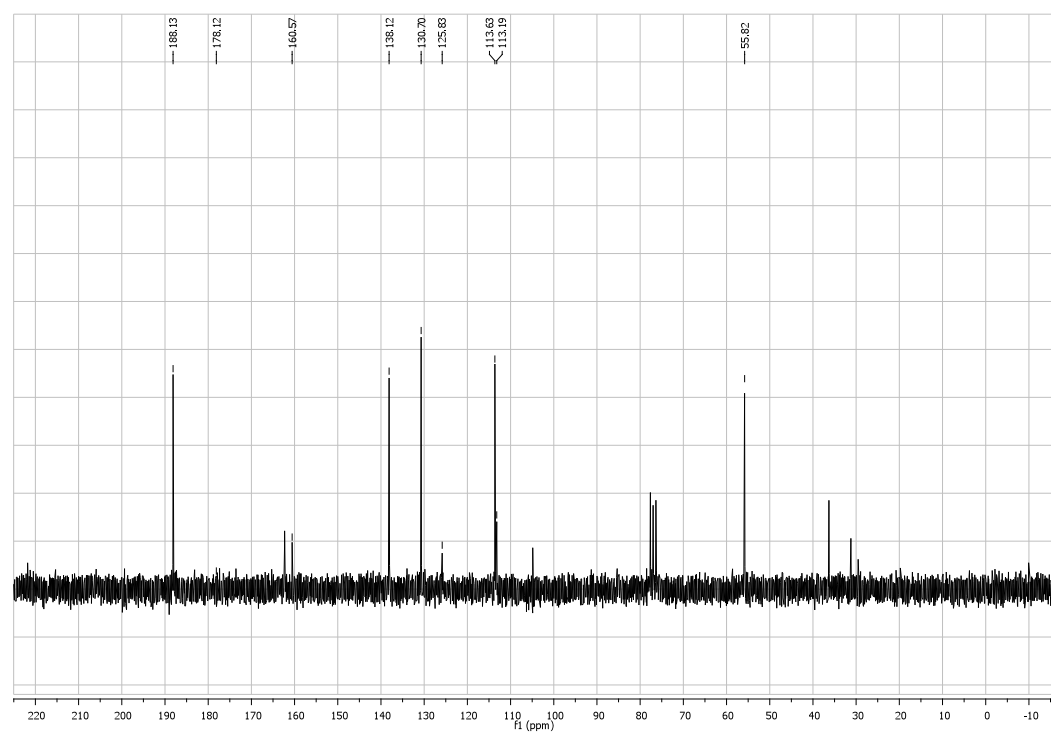

# Methyl 3-(5-chloro-2-methoxyphenyl)acrylate (S3a)

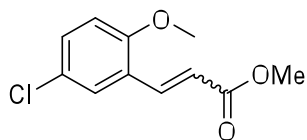

**S3a**

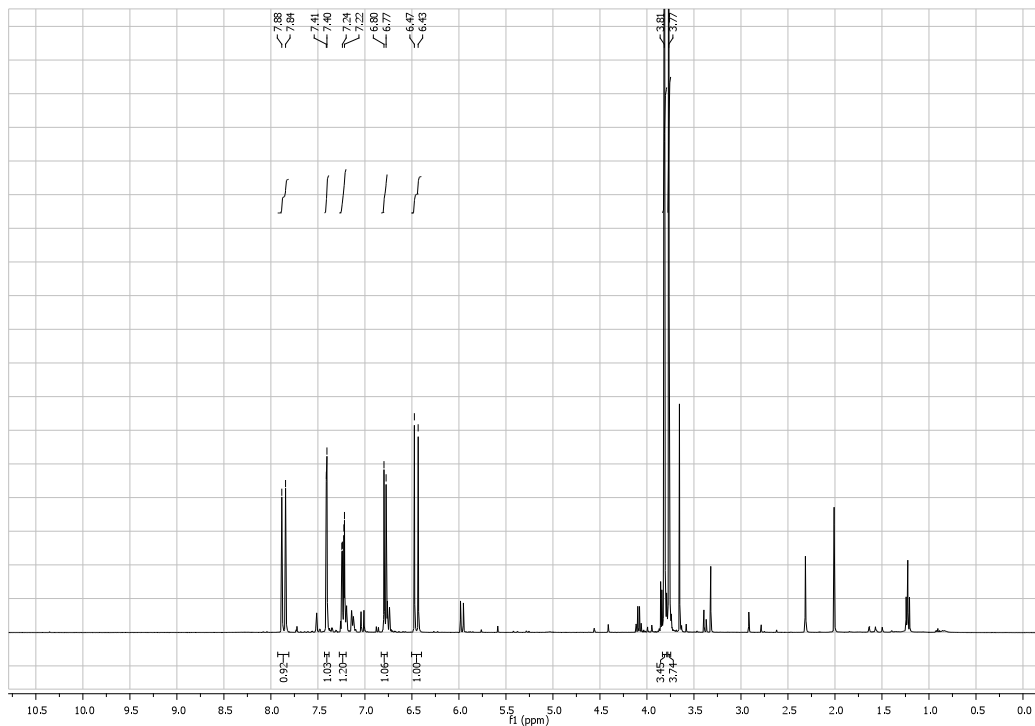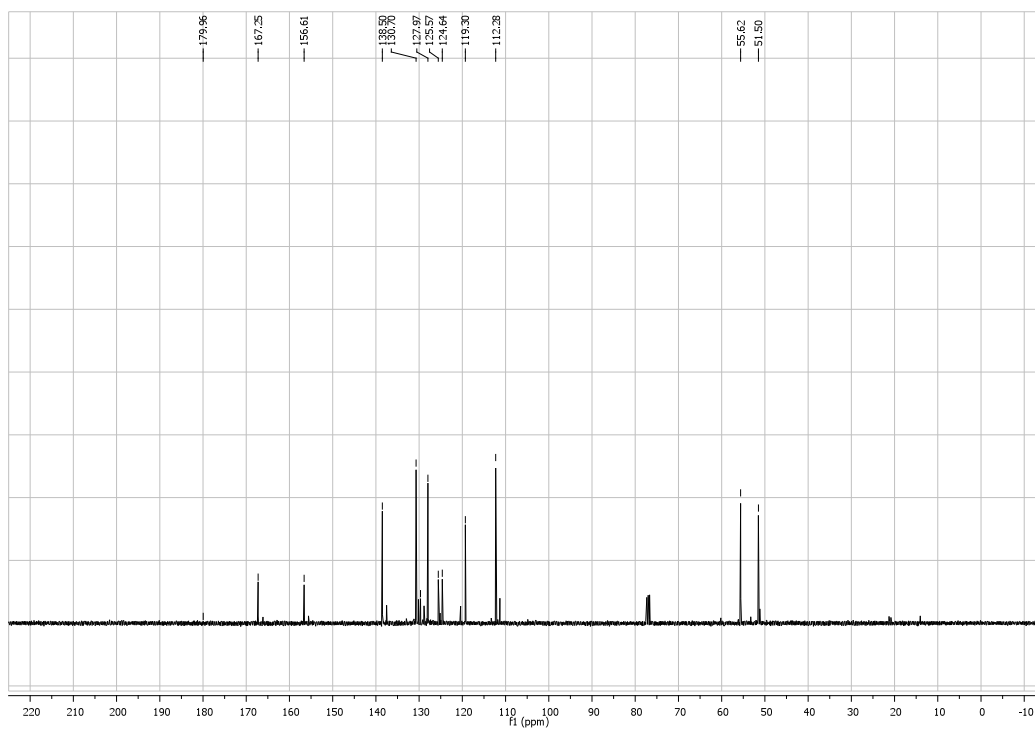

# Methyl 3-(5-bromo-2-methoxyphenyl)acrylate (S3b)

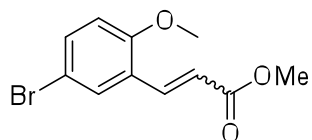

**S3b**

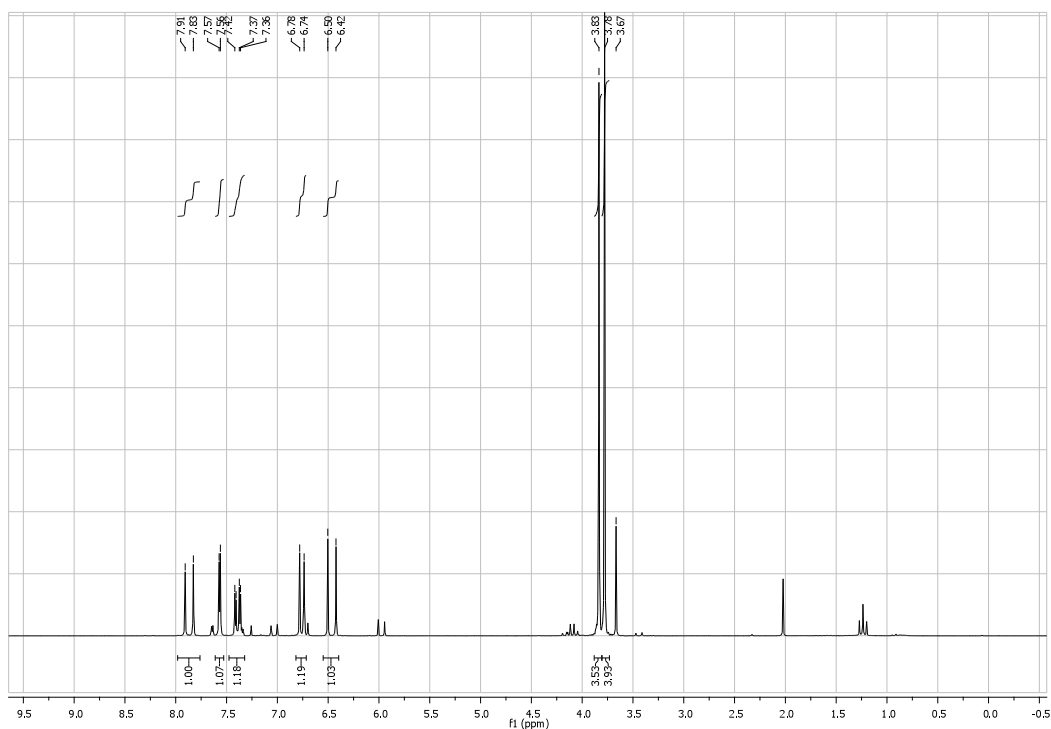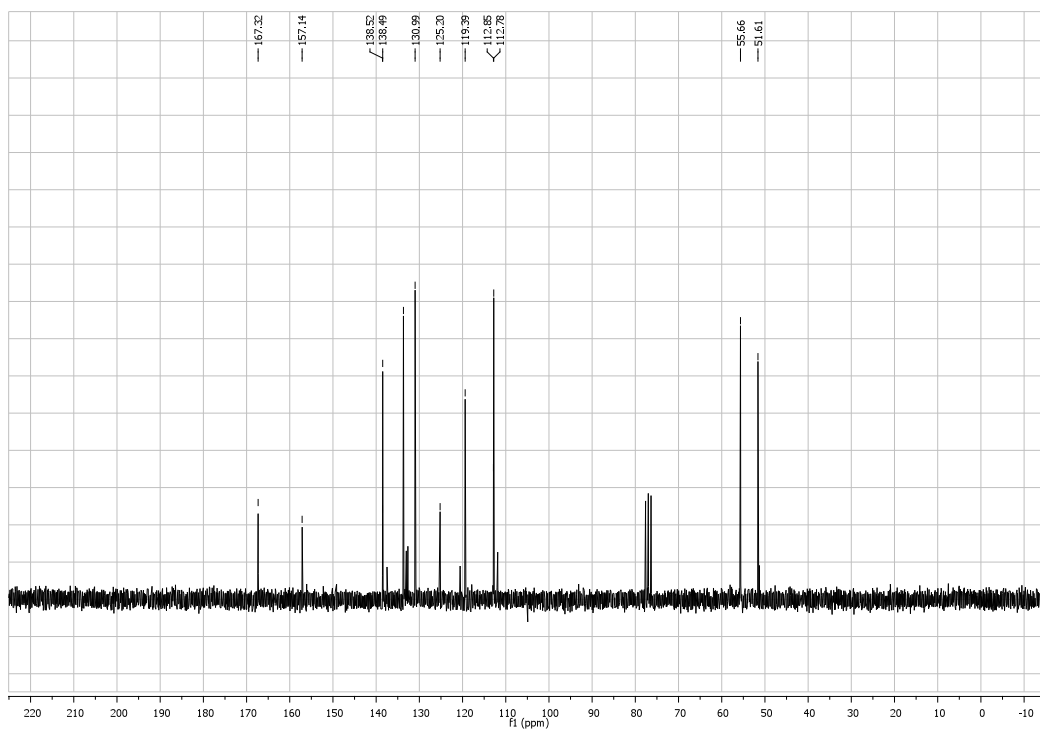

**6-chloro-2H-chromen-2-one (3c)**

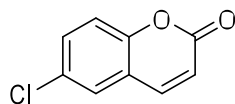

**3c**

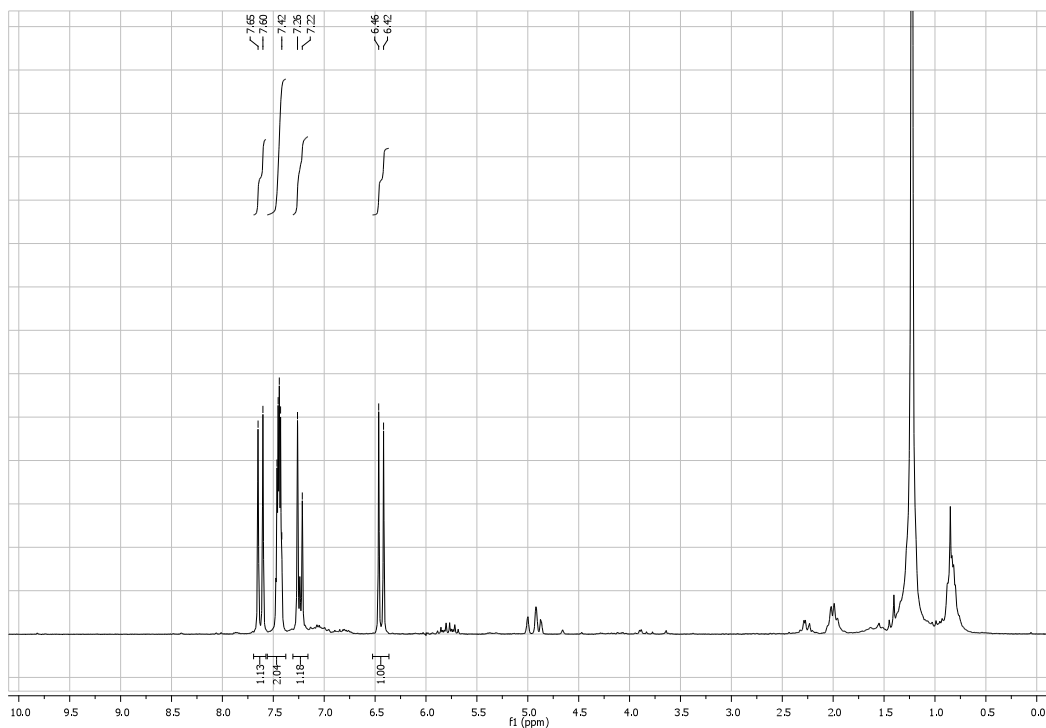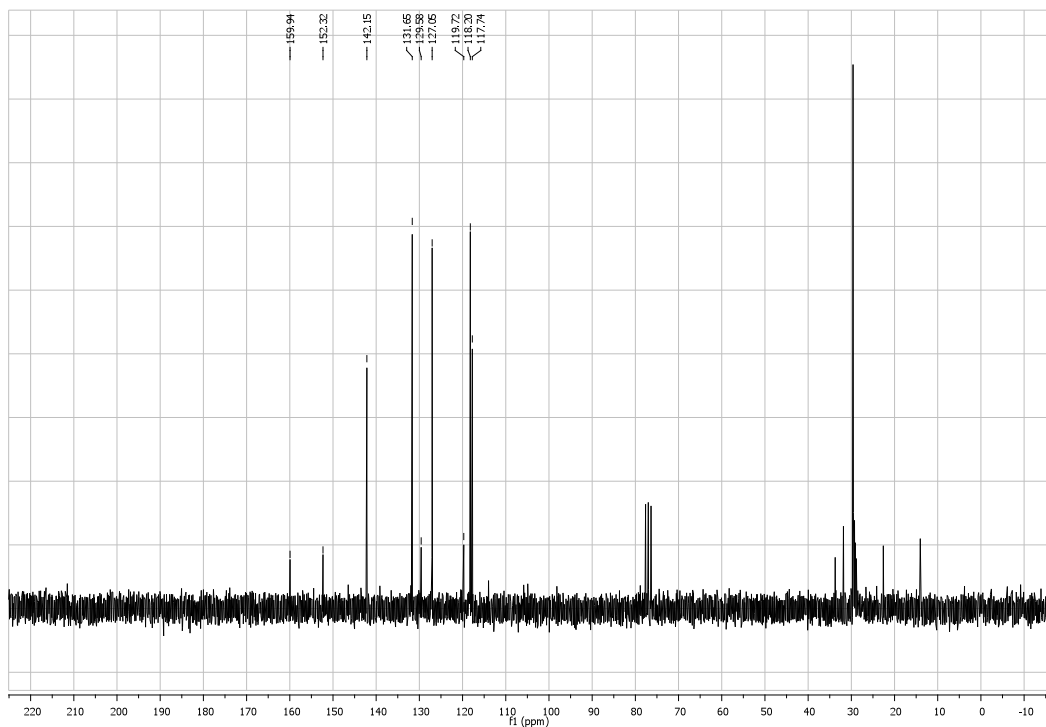



**6-bromo-2H-chromen-2-one (3d)**

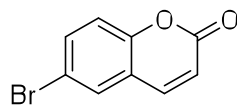

**3d**

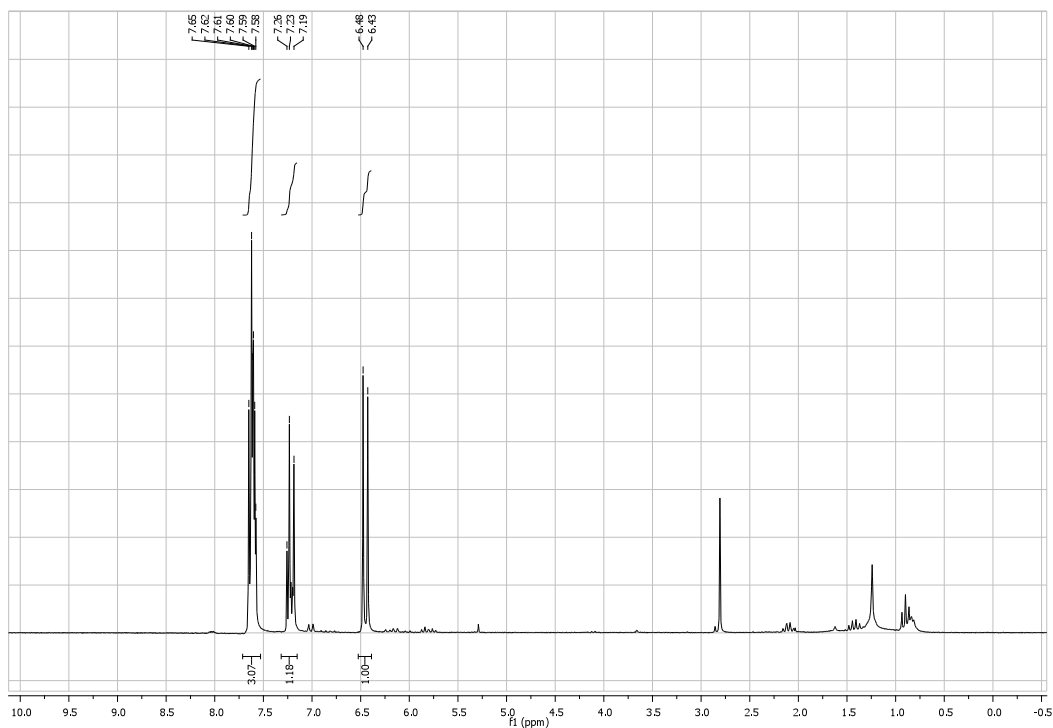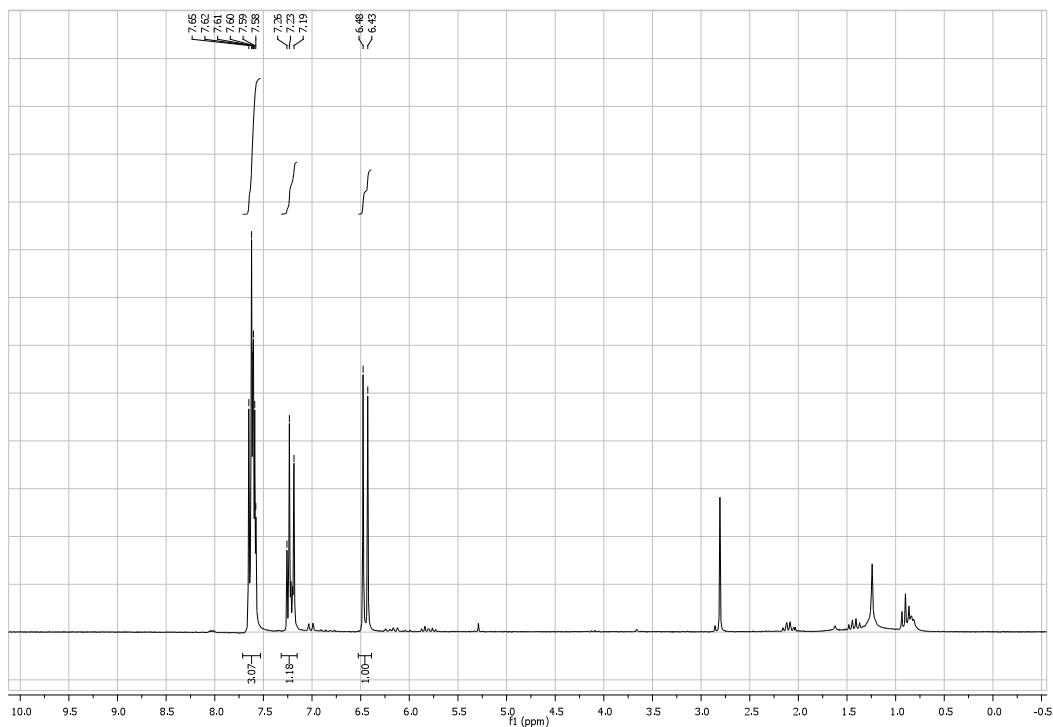

**(R)-4-ethylchroman-2-one (2a)**

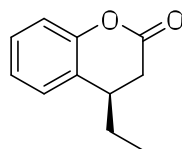

**2a**

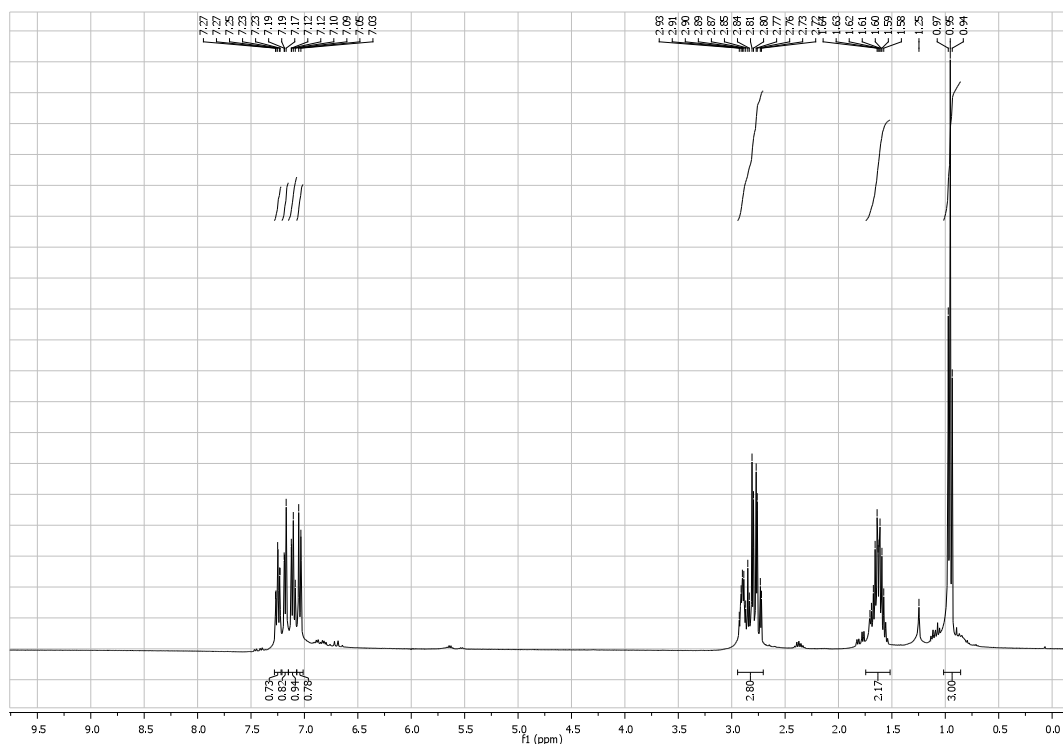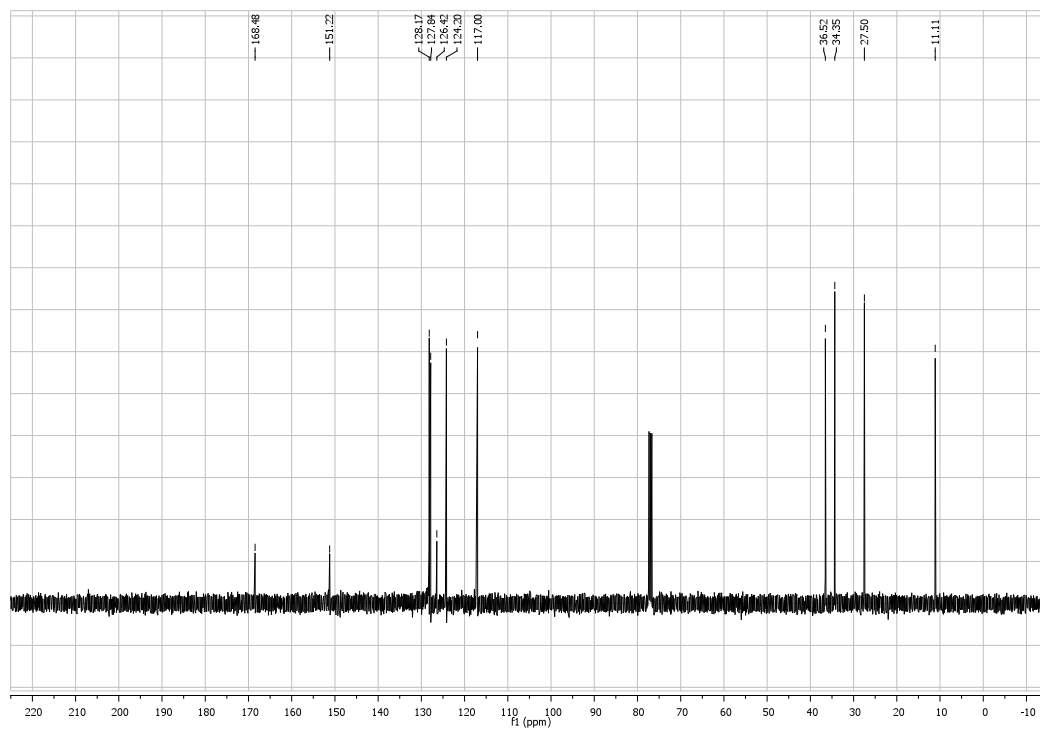

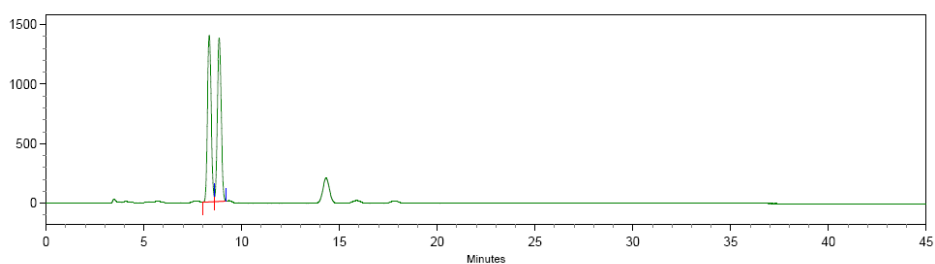

1: 210 nm, 8 nm

| Plk #  | Name | Retention Time | Area     | Area Percent |
|--------|------|----------------|----------|--------------|
| 1      | 1    | 8.341          | 18426009 | 49.78        |
| 2      | 2    | 8.853          | 18586092 | 50.22        |
| Totals |      |                | 37012101 | 100.00       |

Peak: 1

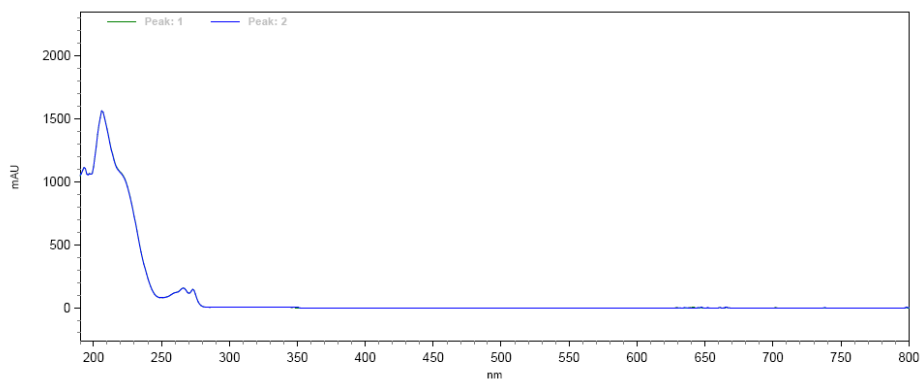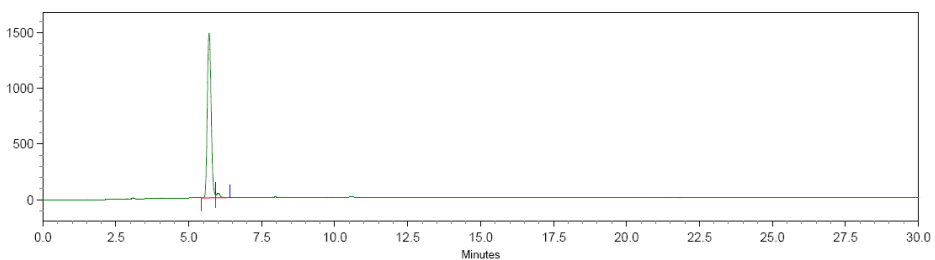

1: 210 nm, 8 nm

| Plk #  | Name | Retention Time | Area     | Area Percent |
|--------|------|----------------|----------|--------------|
| 1      | 1    | 5.696          | 13595789 | 97.67        |
| 2      | 2    | 6.005          | 323703   | 2.33         |
| Totals |      |                | 13919492 | 100.00       |



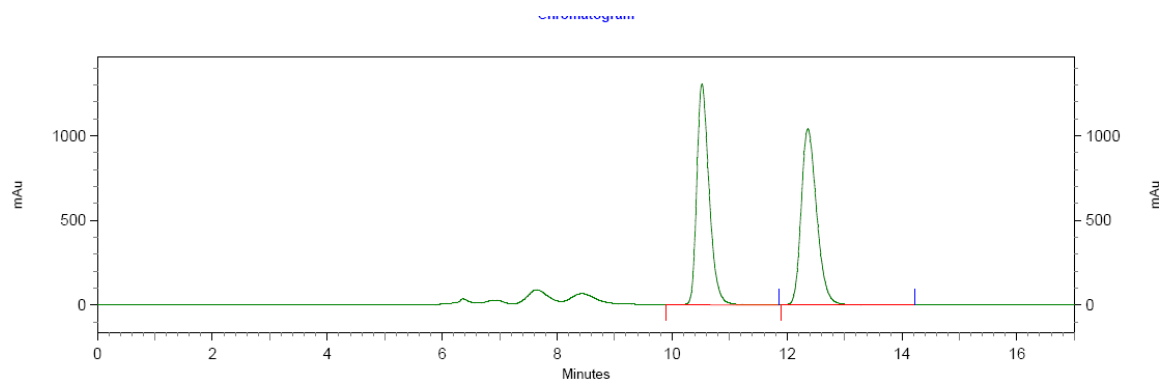

1: 210  
nm, 2 nm

Results

| Pk #   | Name                  | Retention Time | Area     | Area Percent |
|--------|-----------------------|----------------|----------|--------------|
| 1      | Peak @ 10,520 Minutes | 10,520         | 19461340 | 49,909       |
| 2      | Peak @ 12,364 Minutes | 12,364         | 19532524 | 50,091       |
| Totals |                       |                | 38993864 | 100,000      |

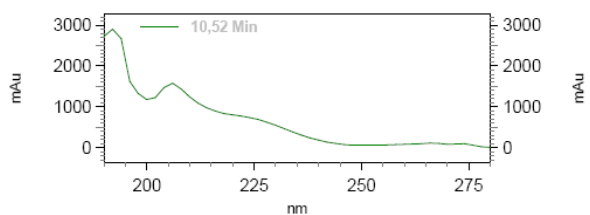

Retention time: 10,520 Min  
Peak name: Peak @ 10,520 Minutes  
Lambda max: 267  
Lambda min: 253

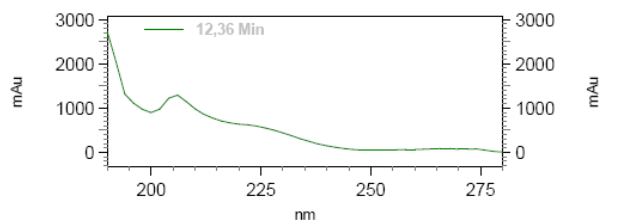

Retention time: 12,364 Min  
Peak name: Peak @ 12,364 Minutes  
Lambda max: 267  
Lambda min: 253

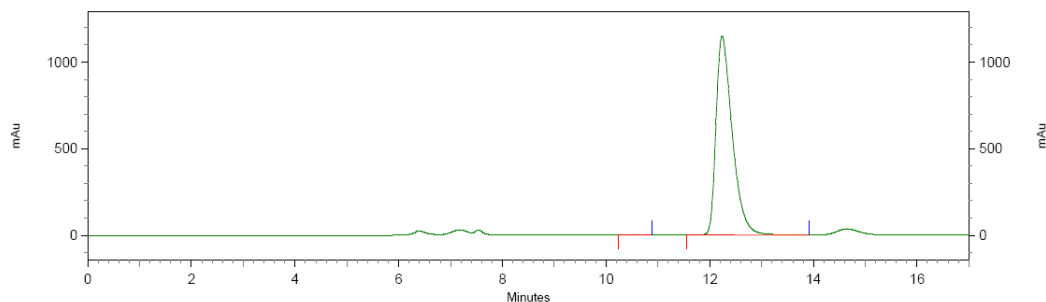

1: 210  
nm, 2 nm

Results

| Pk #   | Name                  | Retention Time | Area     | Area Percent |
|--------|-----------------------|----------------|----------|--------------|
| 1      | Peak @ 10,556 Minutes | 10,556         | 40265    | 0,161        |
| 2      | Peak @ 12,240 Minutes | 12,240         | 24943841 | 99,839       |
| Totals |                       |                | 24984106 | 100,000      |

**(S)-4-isopropylchroman-2-one (2d)**

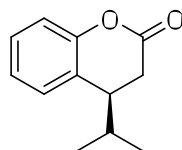

**2d**

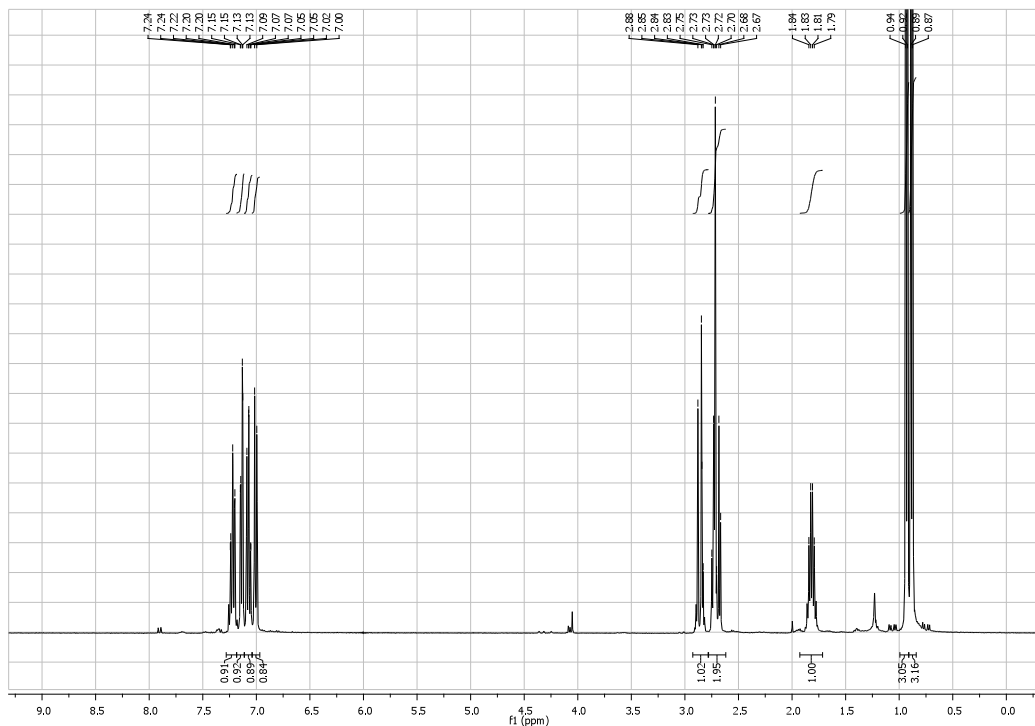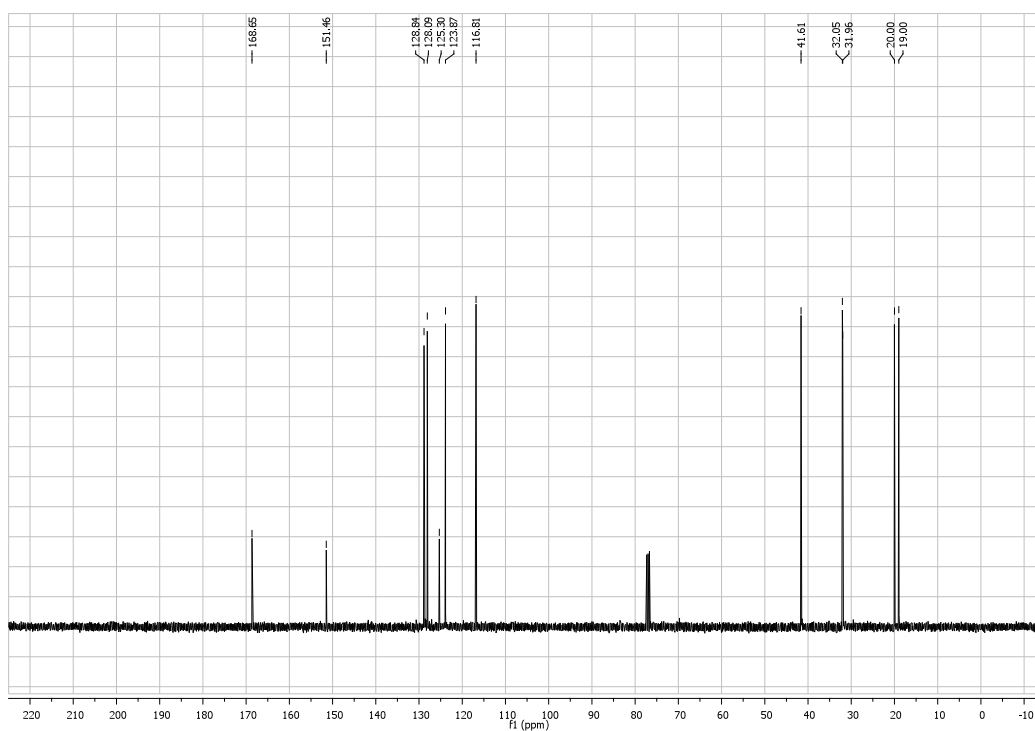

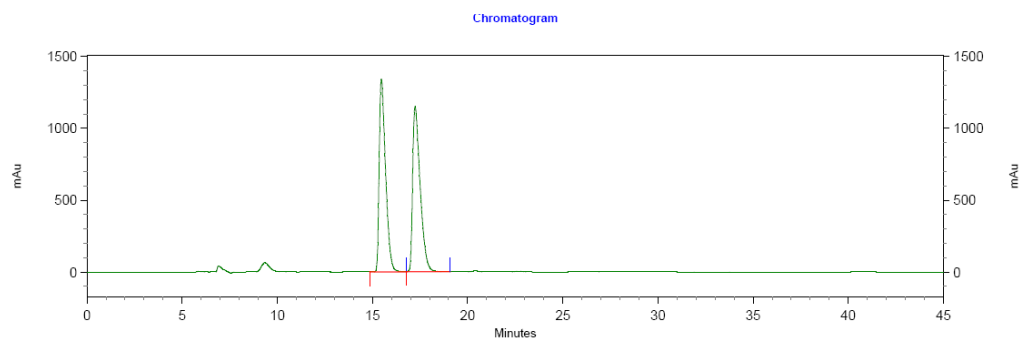

1: 210  
nm, 2 nm  
Results

| Pk #   | Name                  | Retention Time | Area     | Area Percent |
|--------|-----------------------|----------------|----------|--------------|
| 1      | Peak @ 15,468 Minutes | 15,468         | 31395837 | 49,822       |
| 2      | Peak @ 17,240 Minutes | 17,240         | 31619694 | 50,178       |
| Totals |                       |                | 63015531 | 100,000      |

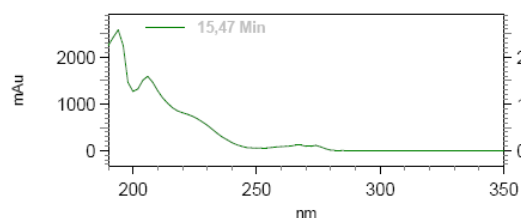

Retention time: 15,468 Min  
Peak name: Peak @ 15,468 Minutes  
Lambda max: 268, 321  
Lambda min: 301, 252

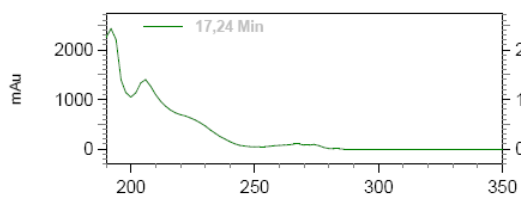

Retention time: 17,240 Min  
Peak name: Peak @ 17,240 Minutes  
Lambda max: 268, 321  
Lambda min: 301, 252

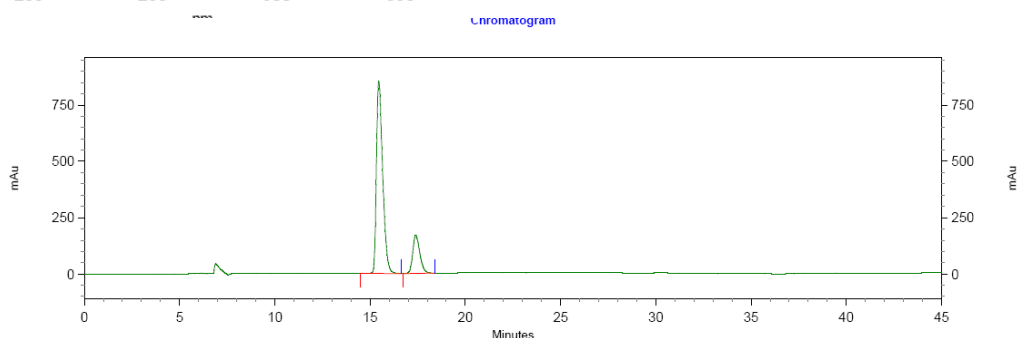

1: 210  
nm, 2 nm  
Results

| Pk #   | Name                  | Retention Time | Area     | Area Percent |
|--------|-----------------------|----------------|----------|--------------|
| 1      | Peak @ 15,456 Minutes | 15,456         | 19497953 | 81,579       |
| 2      | Peak @ 17,400 Minutes | 17,400         | 4402627  | 18,421       |
| Totals |                       |                | 23900580 | 100,000      |

**(R)-4-isobutylchroman-2-one (2e)**

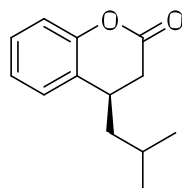

**2e**

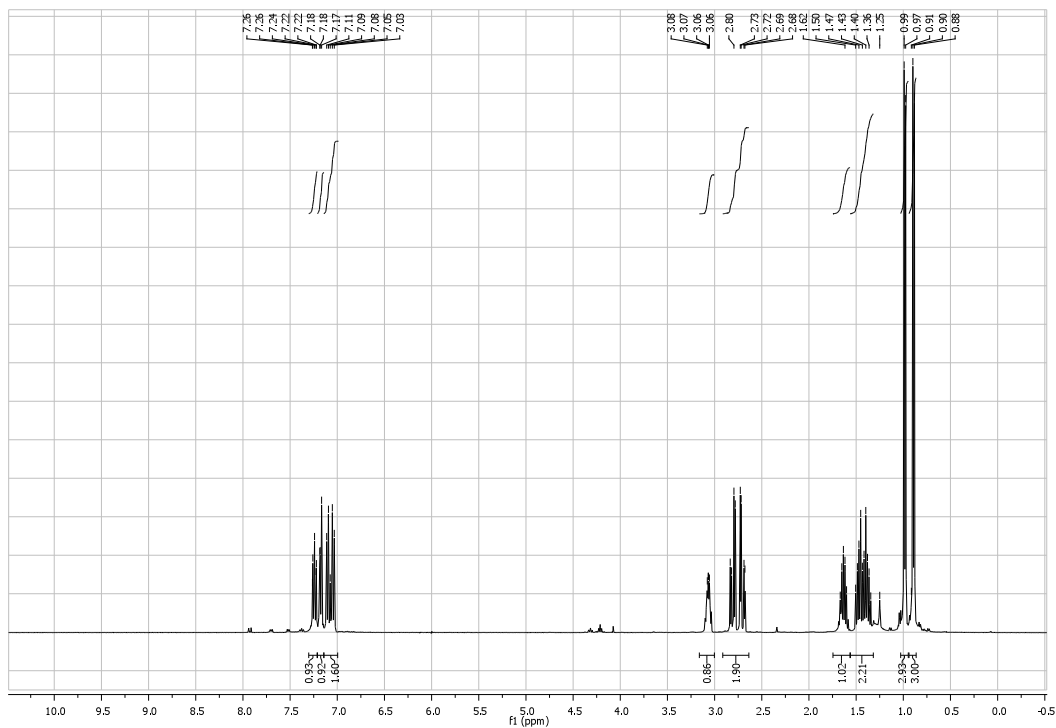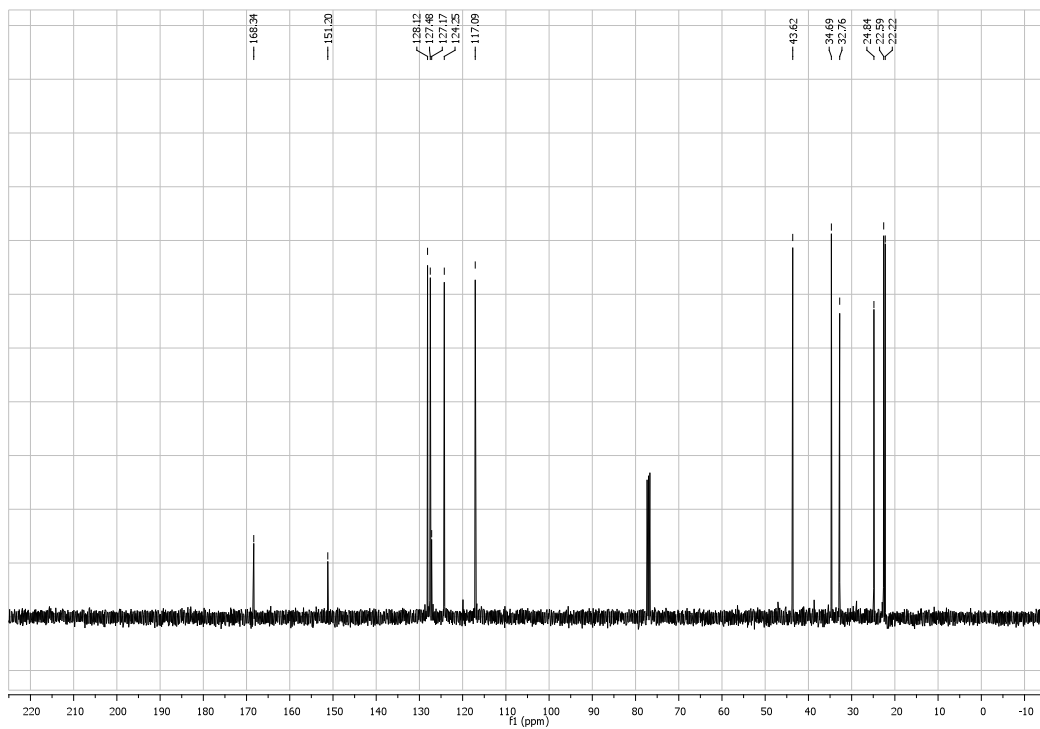



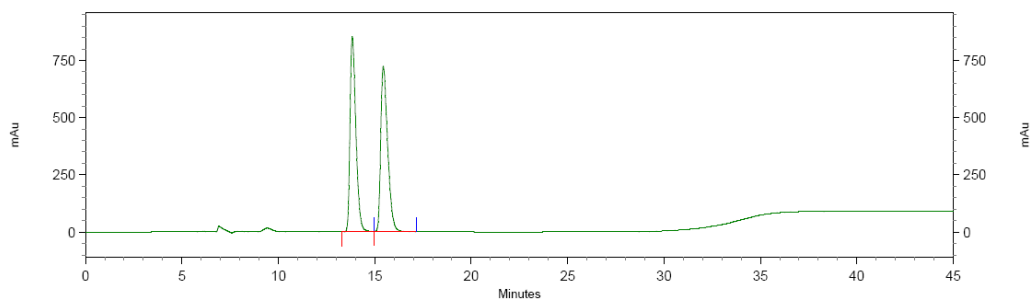

1: 210  
nm, 2 nm  
Results

| Pk #   | Name                  | Retention Time | Area     | Area Percent |
|--------|-----------------------|----------------|----------|--------------|
| 1      | Peak @ 13,836 Minutes | 13,836         | 18070381 | 49,900       |
| 2      | Peak @ 15,444 Minutes | 15,444         | 18143092 | 50,100       |
| Totals |                       |                | 36213473 | 100,000      |

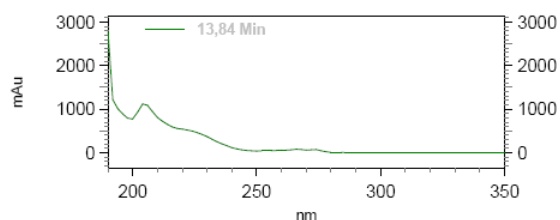

Retention time: 13,836 Min  
Peak name: Peak @ 13,836 Minutes  
Lambda max: 203, 267, 317  
Lambda min: 300, 252, 201

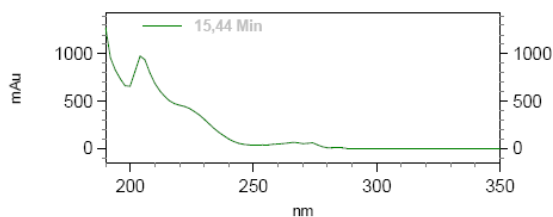

Retention time: 15,444 Min  
Peak name: Peak @ 15,444 Minutes  
Lambda max: 204, 267, 317  
Lambda min: 301, 252, 200

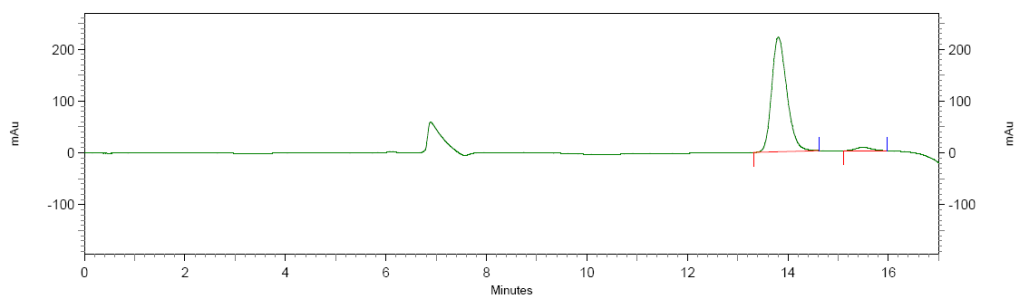

1: 210  
nm, 2 nm  
Results

| Pk #   | Name                  | Retention Time | Area    | Area Percent |
|--------|-----------------------|----------------|---------|--------------|
| 1      | Peak @ 13,808 Minutes | 13,808         | 4644890 | 96,730       |
| 2      | Peak @ 15,496 Minutes | 15,496         | 157031  | 3,270        |
| Totals |                       |                | 4801921 | 100,000      |

**(R)-4-(but-3-enyl)chroman-2-one (2f)**

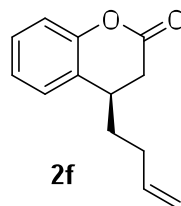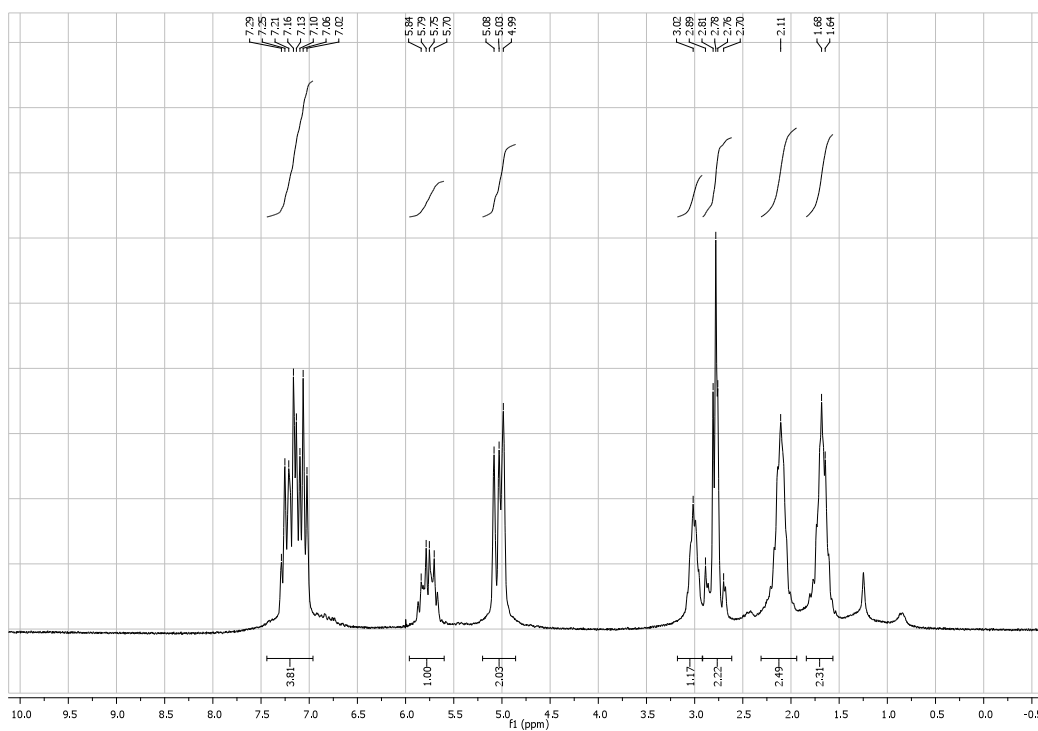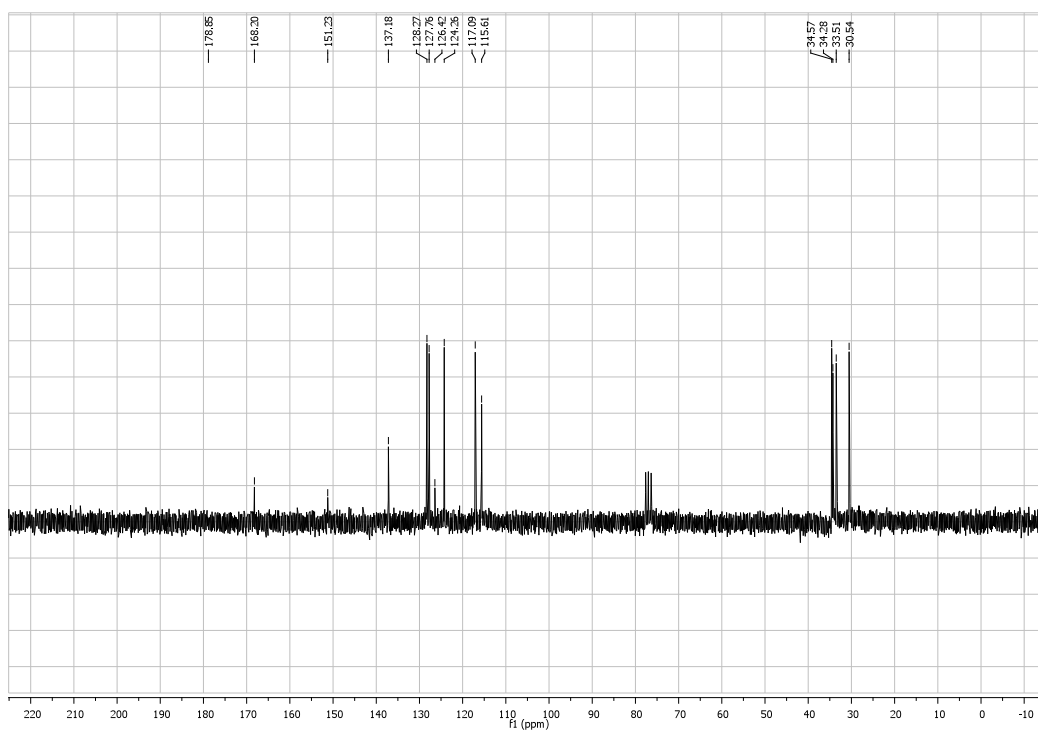

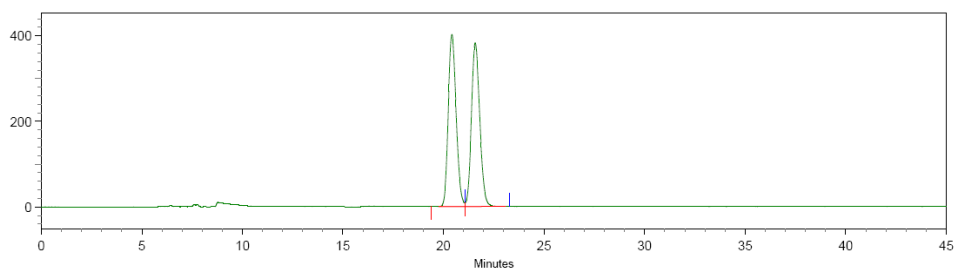

1: 210 nm, 8 nm

| Plk #  | Name | Retention Time | Area     | Area Percent |
|--------|------|----------------|----------|--------------|
| 1      | 1    | 20.416         | 10992857 | 49.95        |
| 2      | 2    | 21.579         | 11015585 | 50.05        |
| Totals |      |                | 22008442 | 100.00       |

Peak: 1

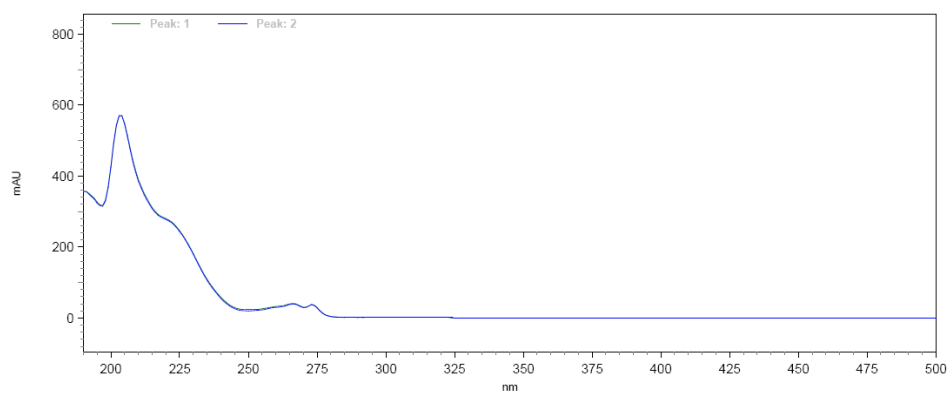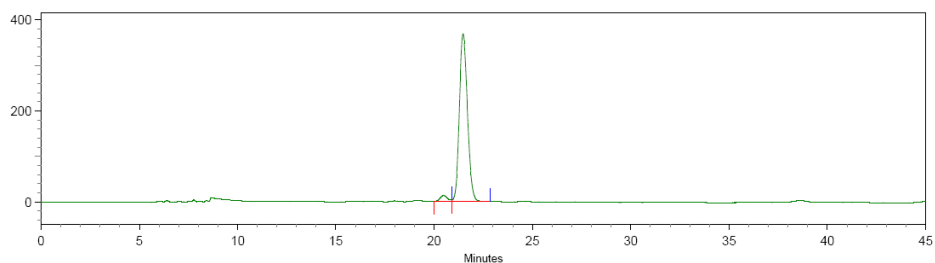

1: 210 nm, 8 nm

| Plk #  | Name | Retention Time | Area     | Area Percent |
|--------|------|----------------|----------|--------------|
| 1      | 1    | 20.480         | 368749   | 3.38         |
| 2      | 2    | 21.472         | 10552647 | 96.62        |
| Totals |      |                | 10921396 | 100.00       |

**(R)-4-phenethylchroman-2-one (2g)**

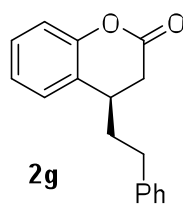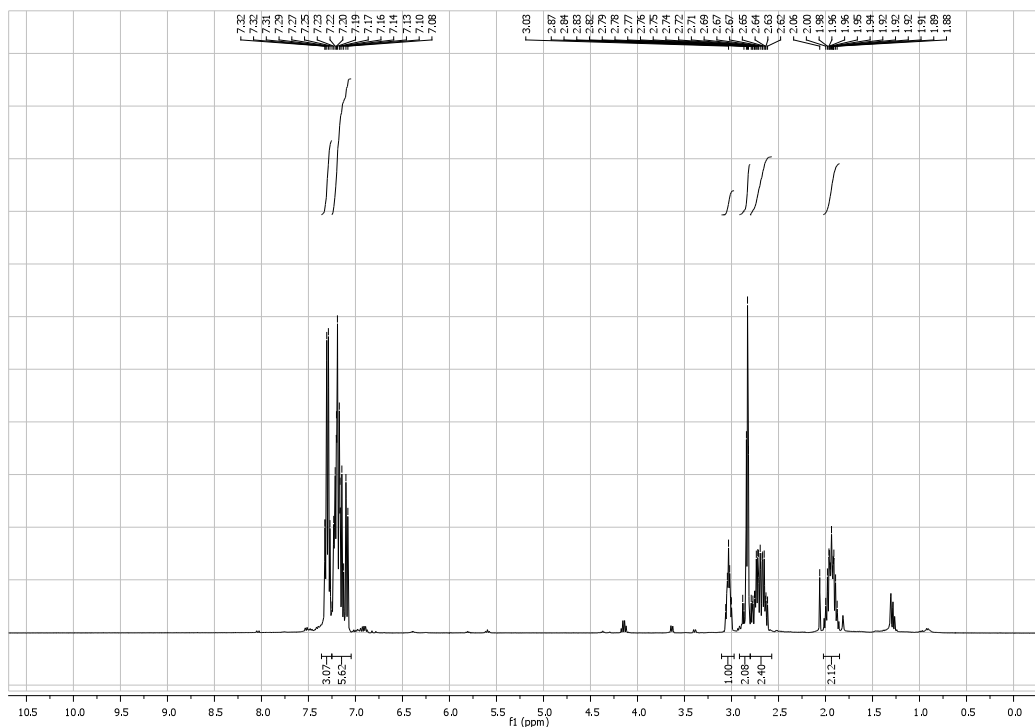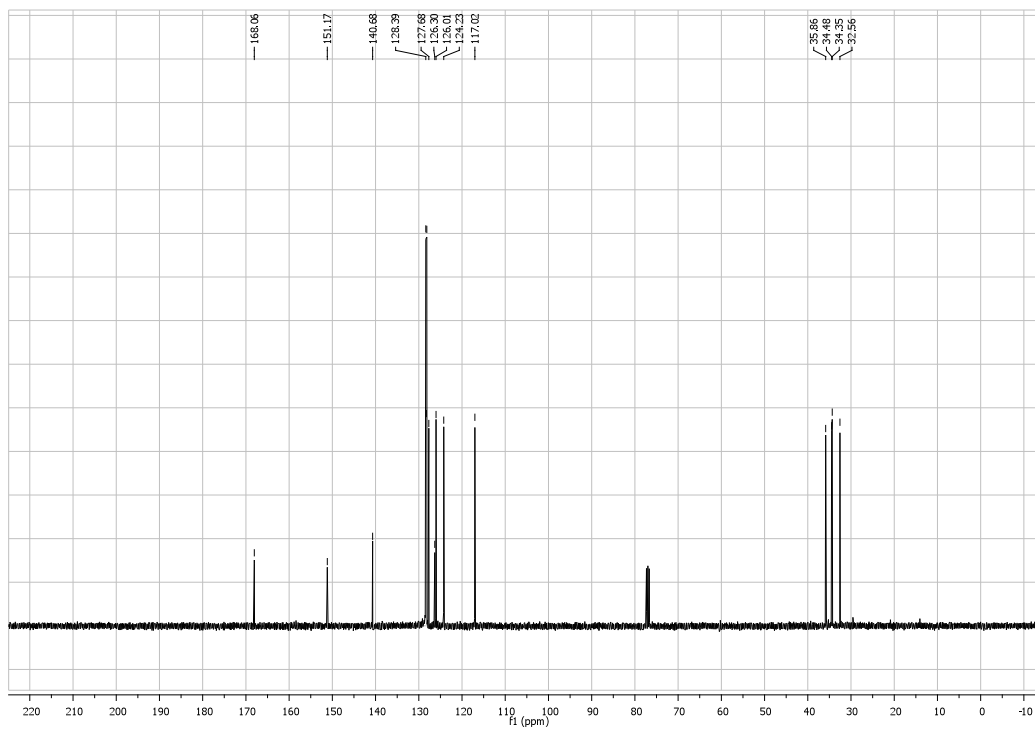

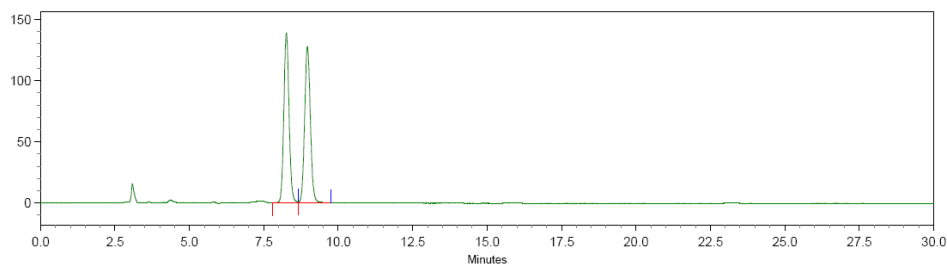

1: 210 nm, 8 nm

| Pk #   | Name | Retention Time | Area    | Area Percent |
|--------|------|----------------|---------|--------------|
| 1      | 1    | 8.256          | 1692015 | 49.86        |
| 2      | 2    | 8.960          | 1701779 | 50.14        |
| Totals |      |                | 3393794 | 100.00       |

Peak: 1

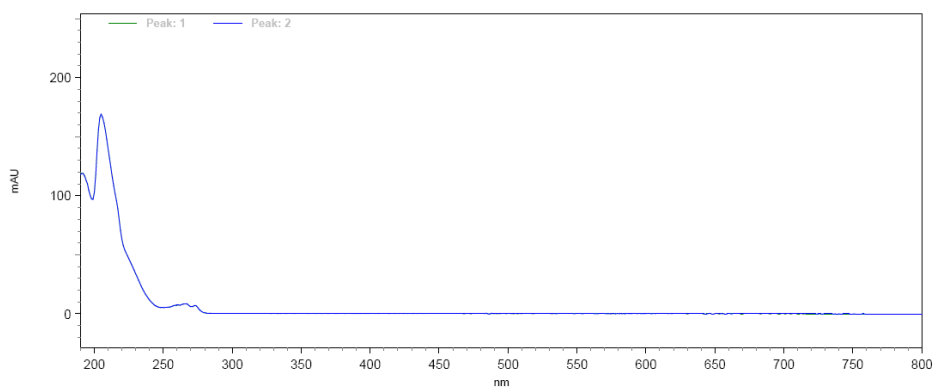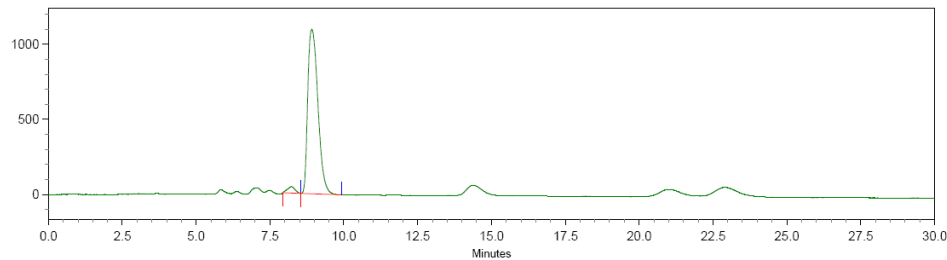

1: 210 nm, 8 nm

| Pk #   | Name | Retention Time | Area     | Area Percent |
|--------|------|----------------|----------|--------------|
| 1      | 1    | 8.224          | 768520   | 2.85         |
| 2      | 2    | 8.917          | 26233032 | 97.15        |
| Totals |      |                | 27001552 | 100.00       |

Peak: 1

**(R)-4-(4-chlorobutyl)chroman-2-one (2h)**

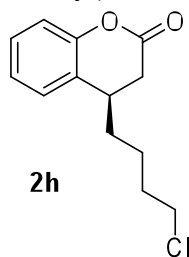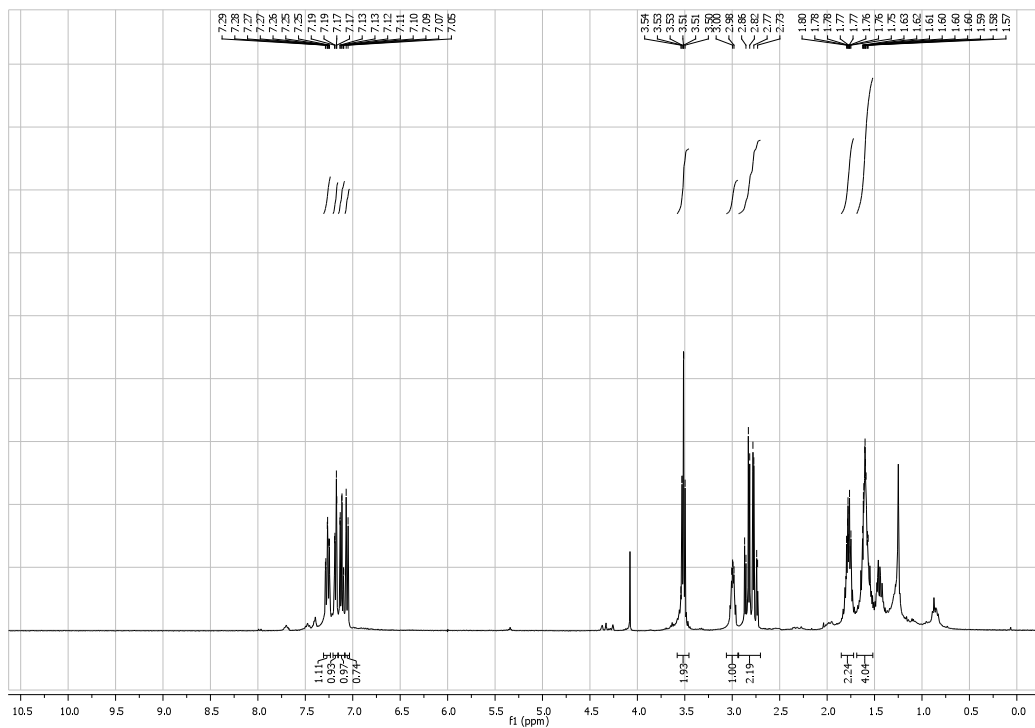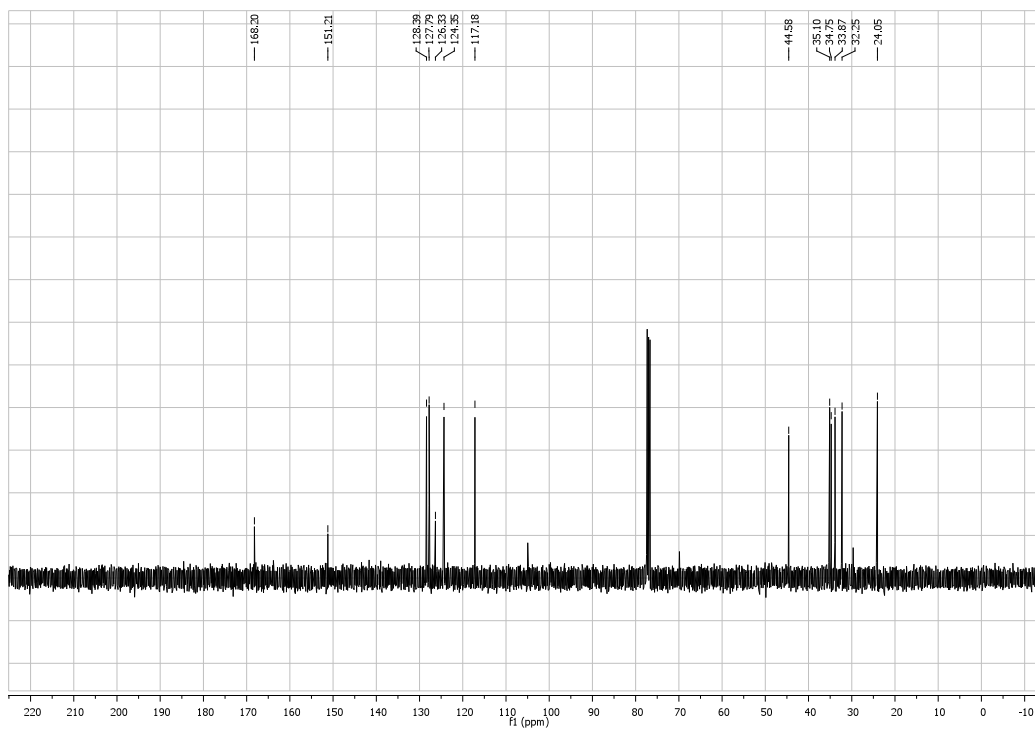

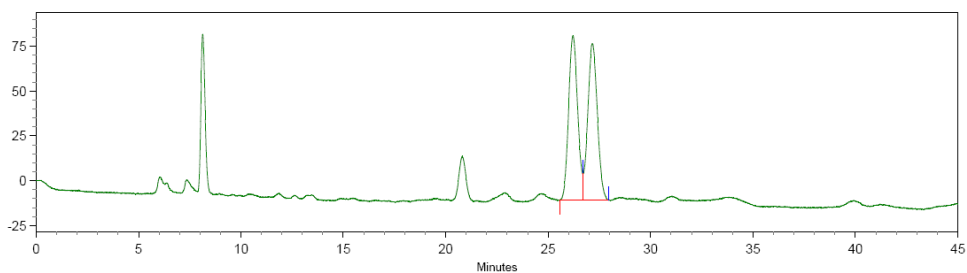

1: 210 nm, 8 nm

| Pk #   | Name | Retention Time | Area    | Area Percent |
|--------|------|----------------|---------|--------------|
| 1      | ?    | 26.208         | 2813195 | 49.65        |
| 2      | ?    | 27.157         | 2852447 | 50.35        |
| Totals |      |                | 5665642 | 100.00       |

Peak: ?

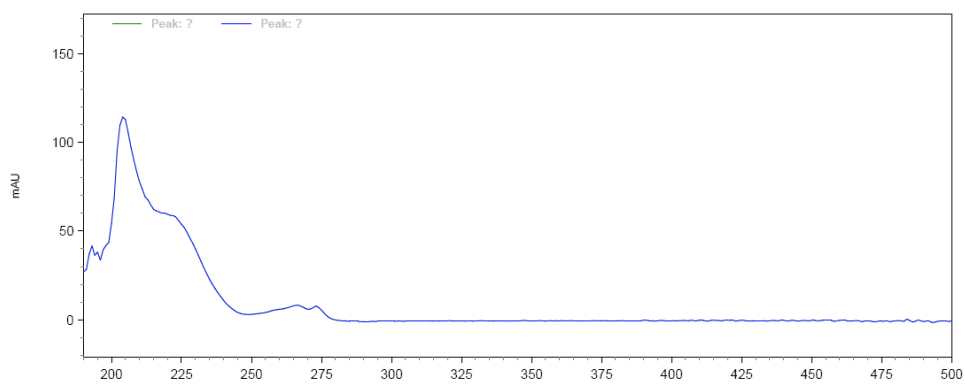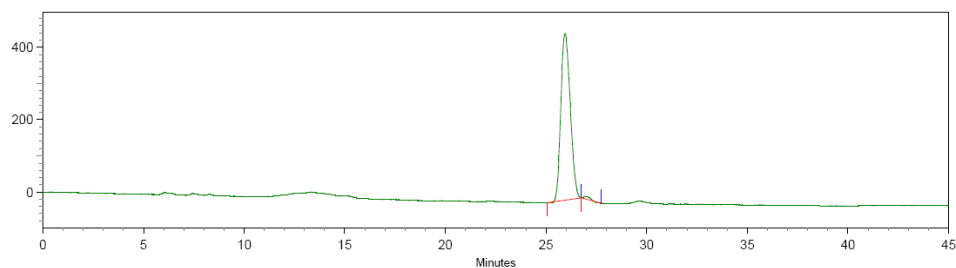

1: 210 nm, 8 nm

| Pk #   | Name | Retention Time | Area     | Area Percent |
|--------|------|----------------|----------|--------------|
| 1      | ?    | 25.952         | 14938105 | 98.93        |
| 2      | ?    | 26.987         | 161227   | 1.07         |
| Totals |      |                | 15099332 | 100.00       |

**(R)-4-ethyl-6-methylchroman-2-one (4a)**

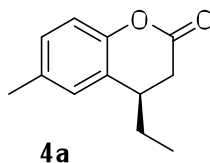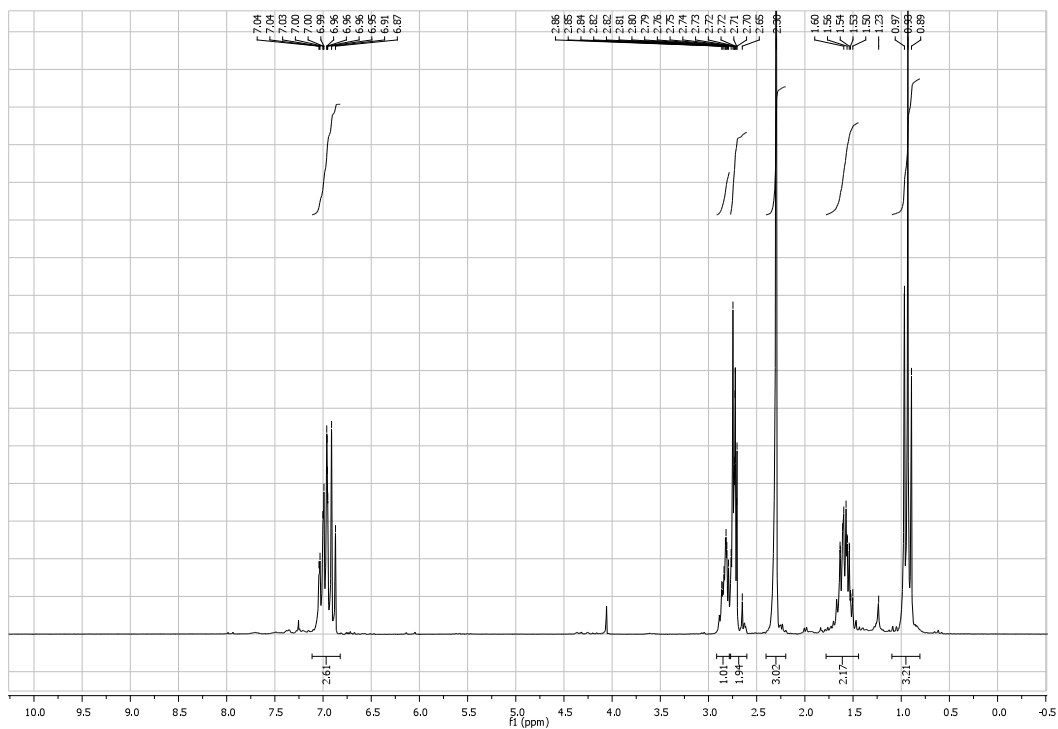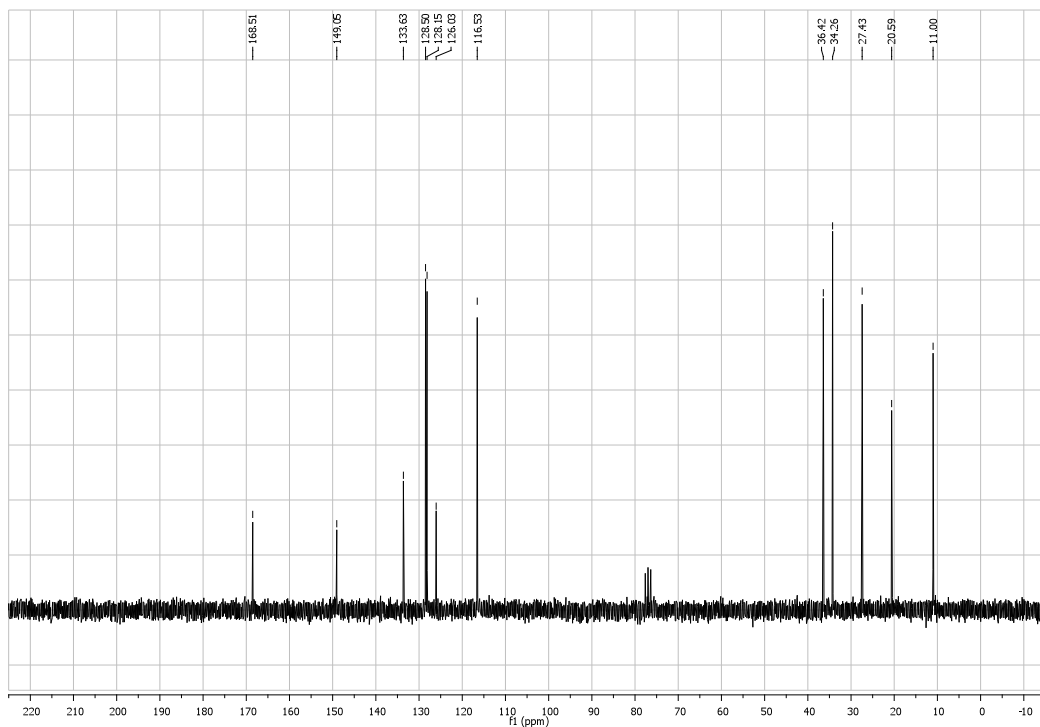



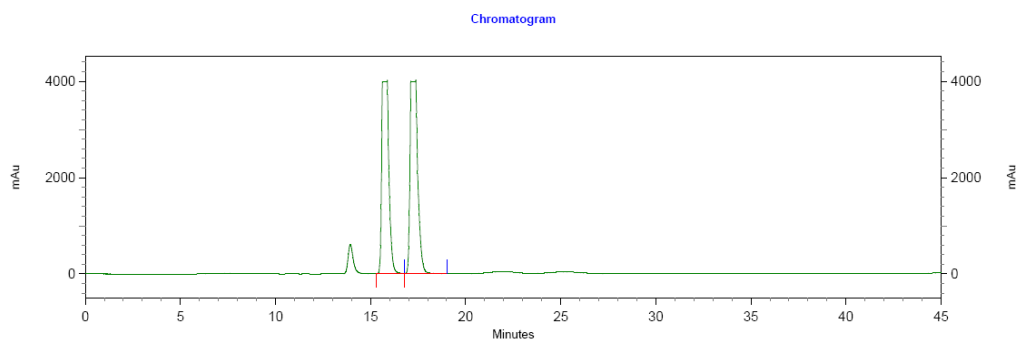

1: 210  
nm, 2 nm  
Results

| Pk #   | Name                  | Retention Time | Area      | Area Percent |
|--------|-----------------------|----------------|-----------|--------------|
| 1      | Peak @ 15,888 Minutes | 15,888         | 104862215 | 48,076       |
| 2      | Peak @ 17,384 Minutes | 17,384         | 113257593 | 51,924       |
| Totals |                       |                | 218119808 | 100,000      |

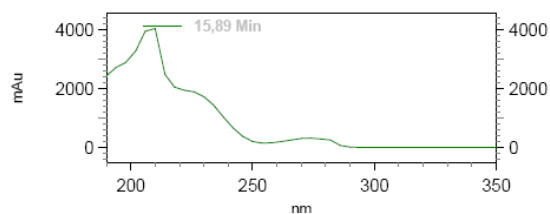

Retention time: 15,888 Min  
Peak name: Peak @ 15,888 Minutes  
Lambda max: 203, 271, 315  
Lambda min: 313, 261

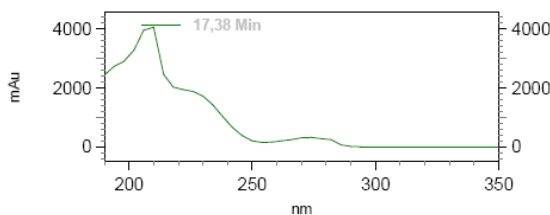

Retention time: 17,384 Min  
Peak name: Peak @ 17,384 Minutes  
Lambda max: 203, 271, 315  
Lambda min: 313, 261

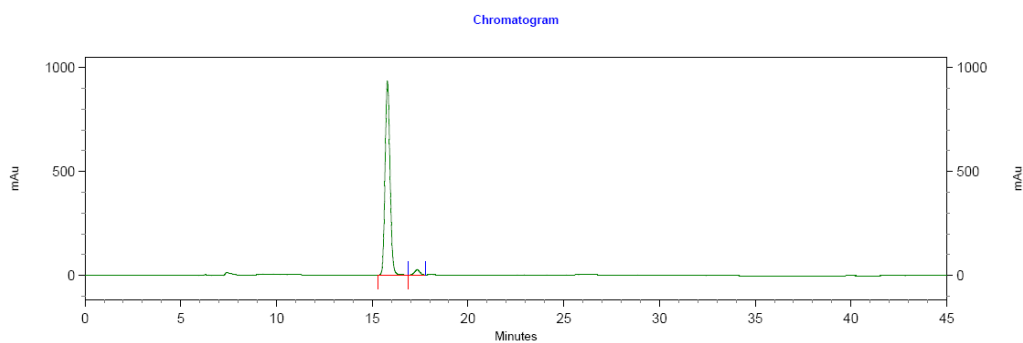

1: 210  
nm, 2 nm  
Results

| Pk #   | Name                  | Retention Time | Area     | Area Percent |
|--------|-----------------------|----------------|----------|--------------|
| 1      | Peak @ 15,792 Minutes | 15,792         | 16633365 | 97,134       |
| 2      | Peak @ 17,340 Minutes | 17,340         | 490793   | 2,866        |
| Totals |                       |                | 17124158 | 100,000      |

**(R)-4-ethyl-7-methylchroman-2-one (4b)**

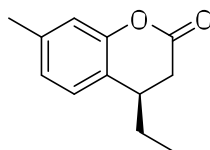

**3b**

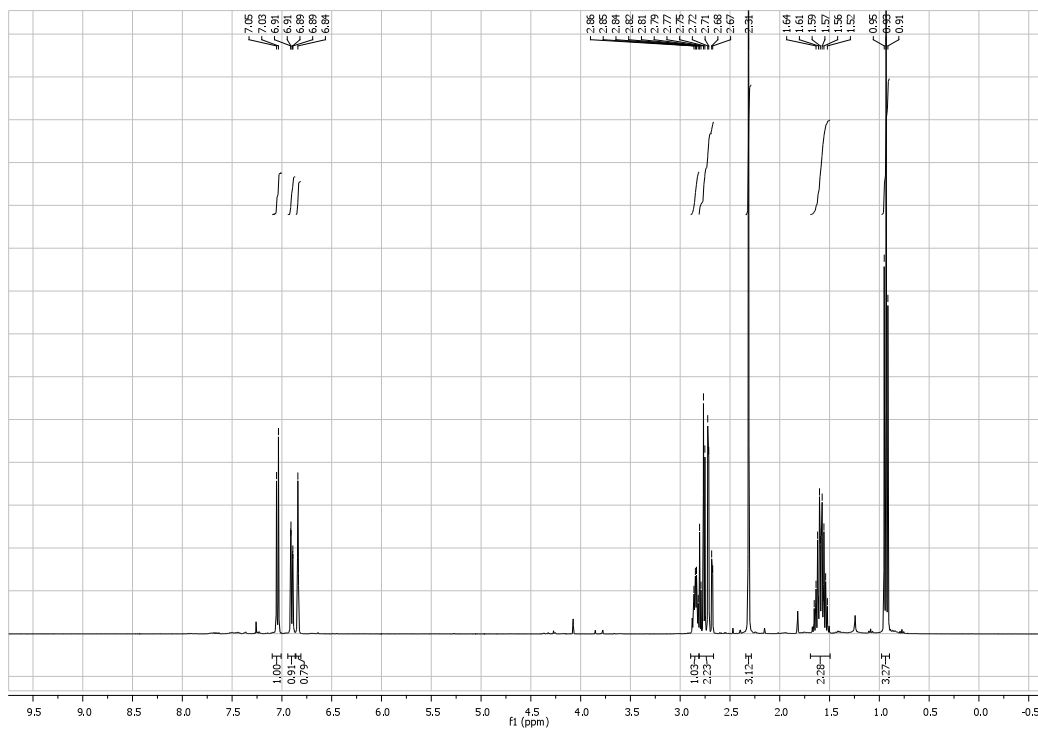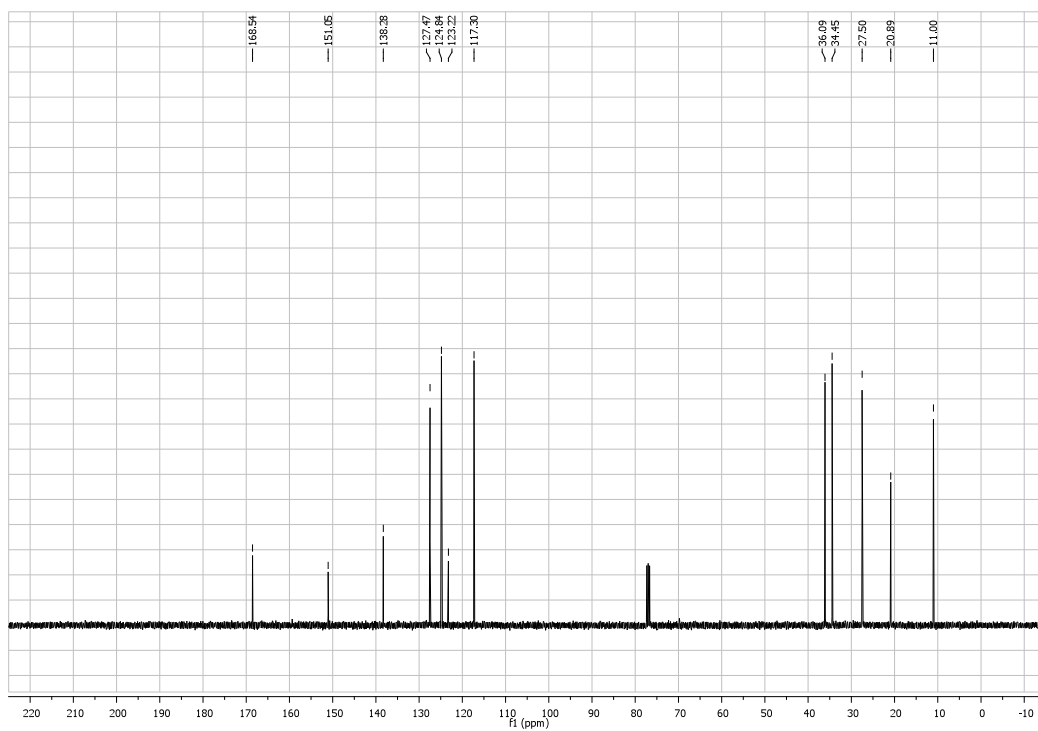

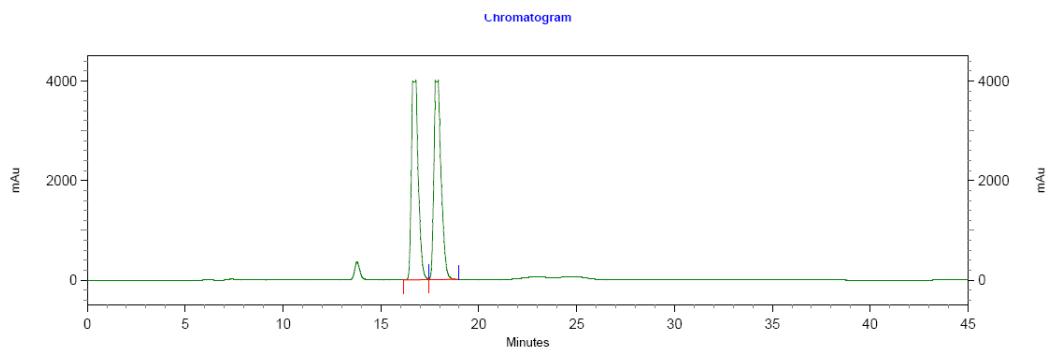

1: 210

nm, 2 nm

Results

| Pk #   | Name                  | Retention Time | Area      | Area Percent |
|--------|-----------------------|----------------|-----------|--------------|
| 1      | Peak @ 16,800 Minutes | 16,800         | 97583622  | 48,785       |
| 2      | Peak @ 17,776 Minutes | 17,776         | 102443923 | 51,215       |
| Totals |                       |                | 200027545 | 100,000      |

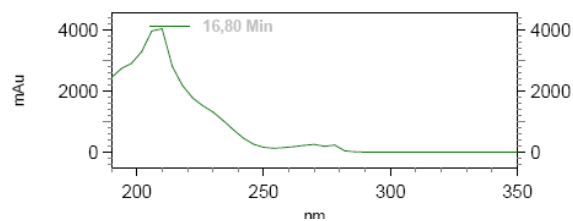

Retention time: 16,800 Min  
Peak name: Peak @ 16,800 Minutes  
Lambda max: 204, 266  
Lambda min: 261

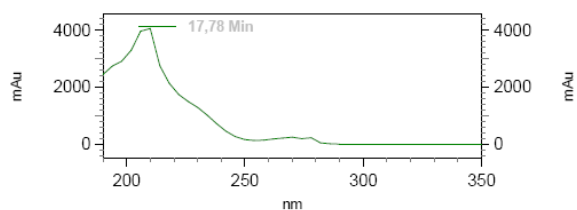

Retention time: 17,776 Min  
Peak name: Peak @ 17,776 Minutes  
Lambda max: 204, 266  
Lambda min: 261

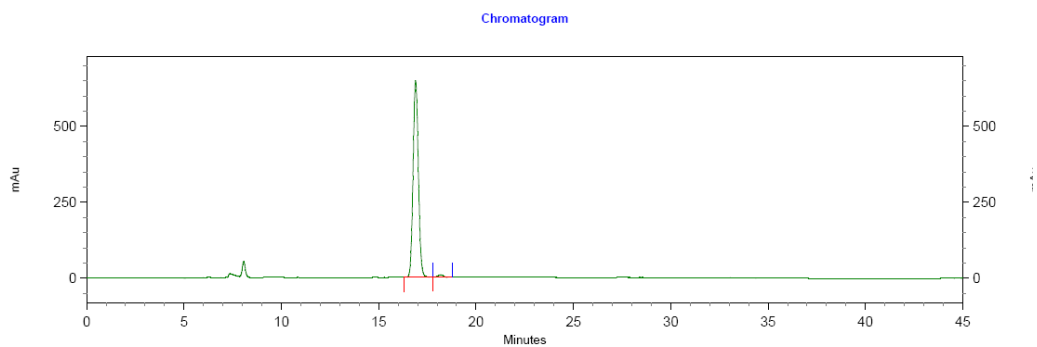

1: 210

nm, 2 nm

Results

| Pk #   | Name                  | Retention Time | Area     | Area Percent |
|--------|-----------------------|----------------|----------|--------------|
| 1      | Peak @ 16,900 Minutes | 16,900         | 12275155 | 98,536       |
| 2      | Peak @ 18,180 Minutes | 18,180         | 182436   | 1,464        |
| Totals |                       |                | 12457591 | 100,000      |

**(R)-6-chloro-4-ethylchroman-2-one (4c)**

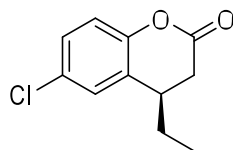

**4c**

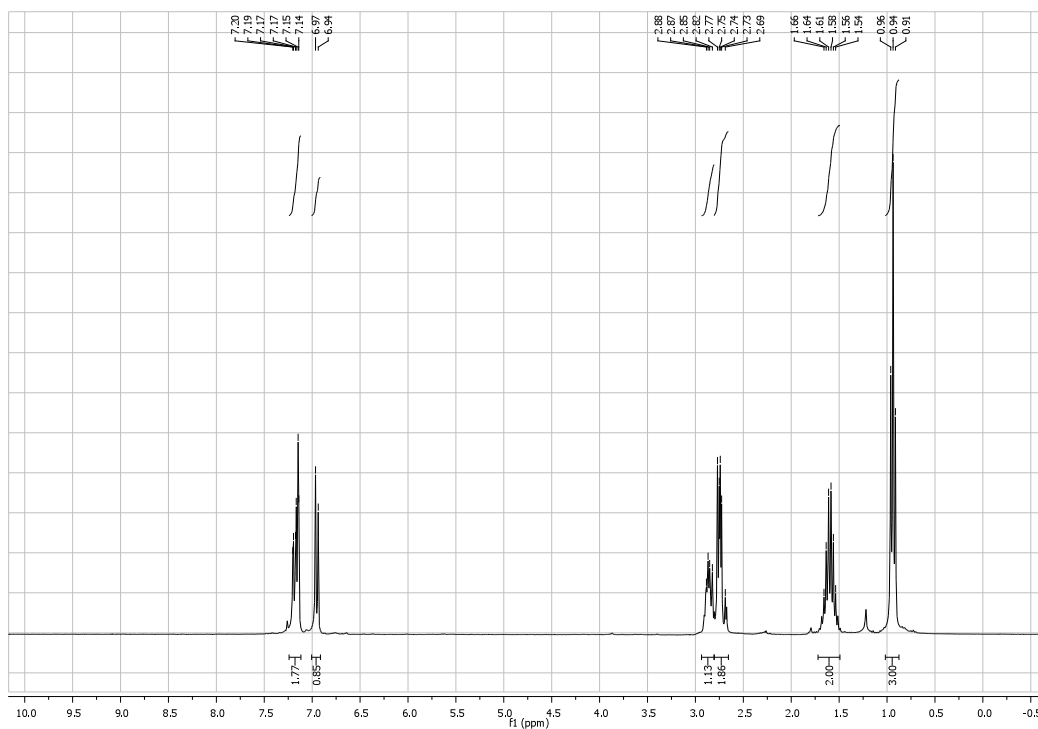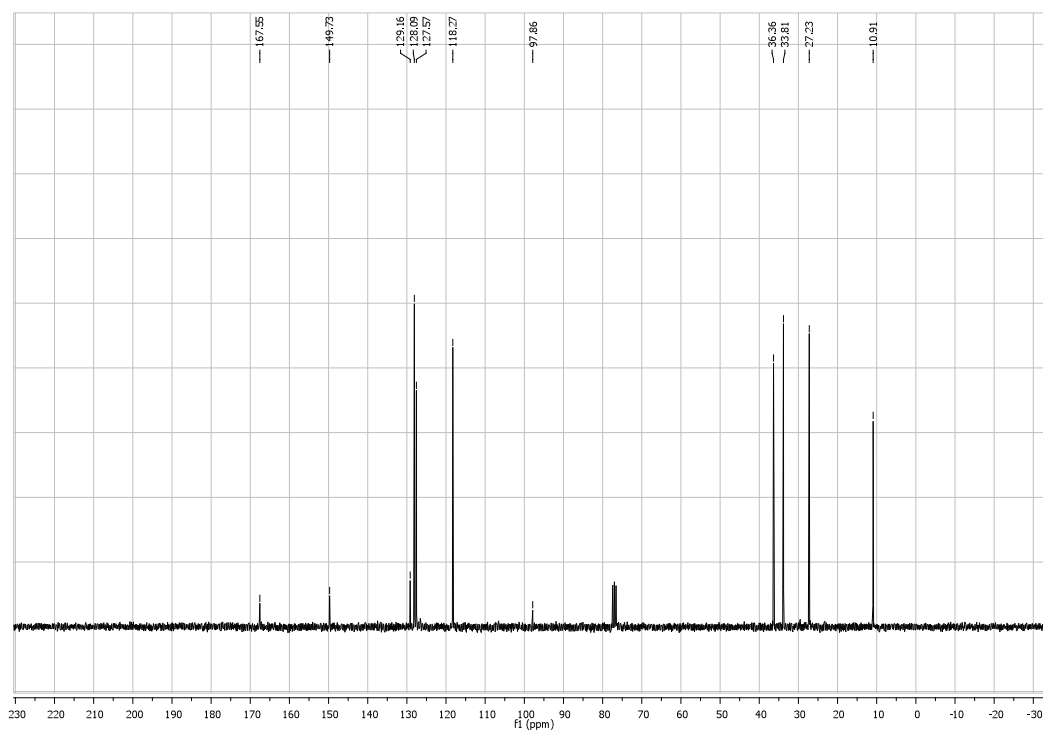

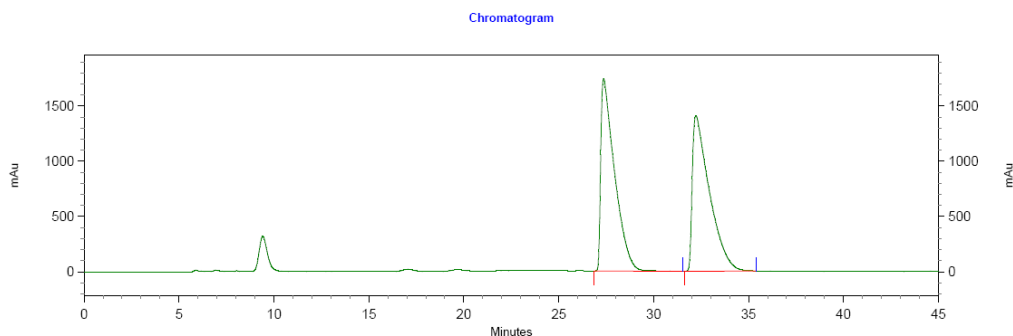

1: 210  
nm, 2 nm  
Results

| Pk #   | Name                  | Retention Time | Area      | Area Percent |
|--------|-----------------------|----------------|-----------|--------------|
| 1      | Peak @ 27,364 Minutes | 27,364         | 88081245  | 49,953       |
| 2      | Peak @ 32,228 Minutes | 32,228         | 88246655  | 50,047       |
| Totals |                       |                | 176327900 | 100,000      |

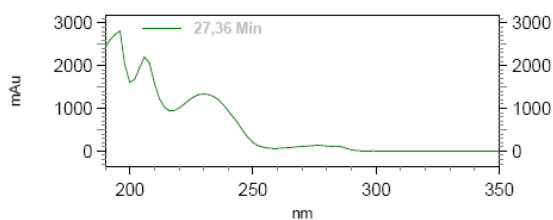

Retention time: 27,364 Min  
Peak name: Peak @ 27,364 Minutes  
Lambda max: 190, 230, 277  
Lambda min: 261, 219

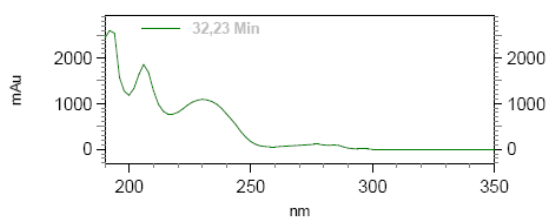

Retention time: 32,228 Min  
Peak name: Peak @ 32,228 Minutes  
Lambda max: 230, 277  
Lambda min: 261, 219

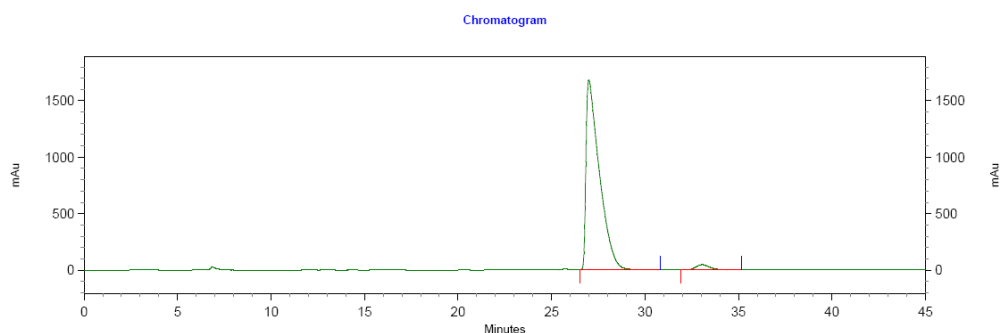

1: 210  
nm, 2 nm  
Results

| Pk #   | Name                  | Retention Time | Area     | Area Percent |
|--------|-----------------------|----------------|----------|--------------|
| 1      | Peak @ 27,000 Minutes | 27,000         | 83688317 | 97,310       |
| 2      | Peak @ 33,052 Minutes | 33,052         | 2313122  | 2,690        |
| Totals |                       |                | 86001439 | 100,000      |

**(R)-6-bromo-4-ethylchroman-2-one (4d)**

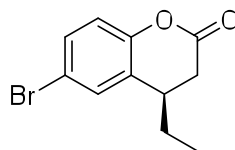

**4d**

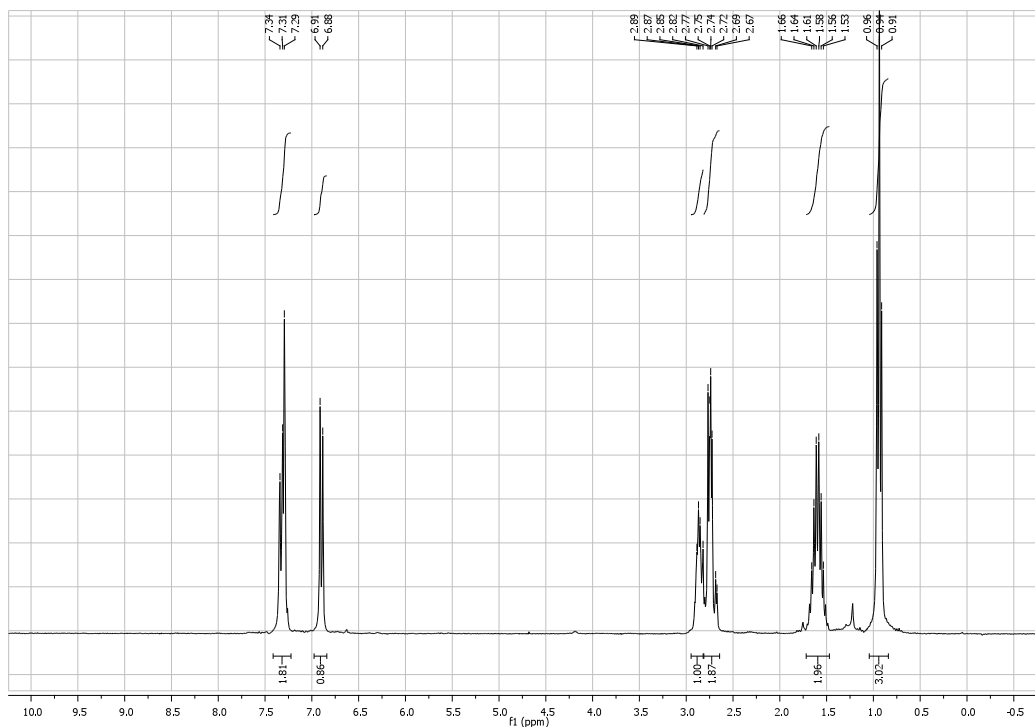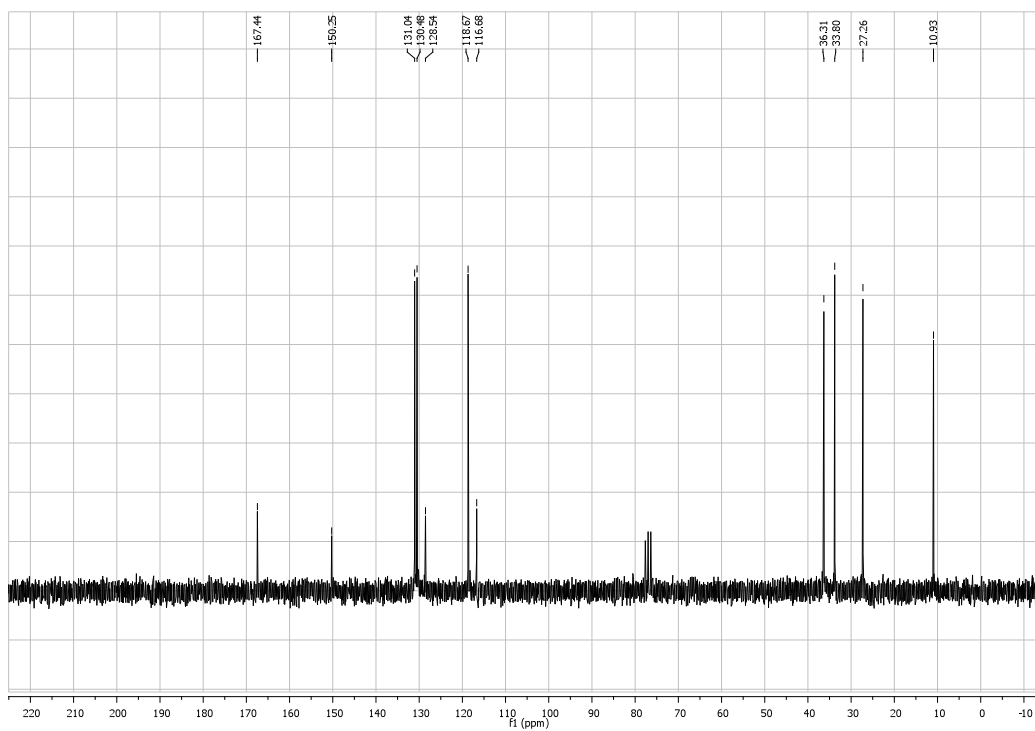

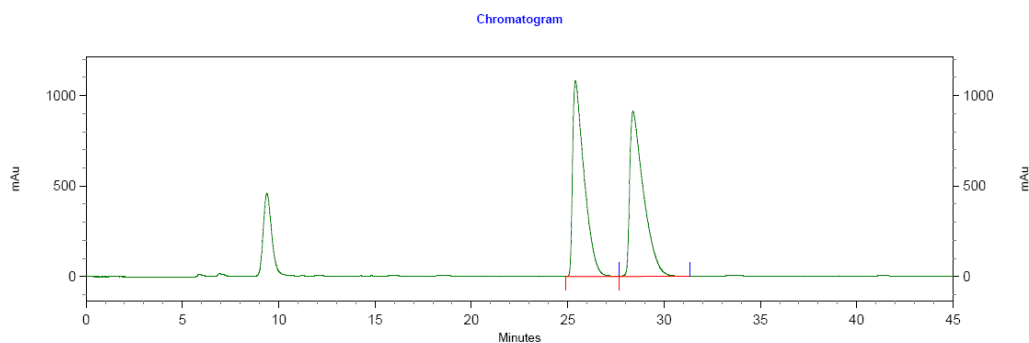

1: 210  
nm, 2 nm  
Results

| Pk # | Name                  | Retention Time | Area     | Area Percent |
|------|-----------------------|----------------|----------|--------------|
| 1    | Peak @ 25,404 Minutes | 25,404         | 44806839 | 49,770       |
| 2    | Peak @ 28,392 Minutes | 28,392         | 45221605 | 50,230       |

|        |  |  |          |         |
|--------|--|--|----------|---------|
| Totals |  |  | 90028444 | 100,000 |
|--------|--|--|----------|---------|

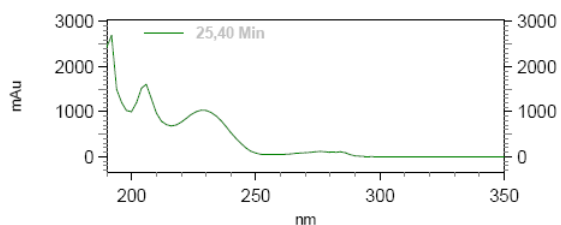

Retention time: 25,404 Min  
Peak name: Peak @ 25,404 Minutes  
Lambda max: 229, 278, 319  
Lambda min: 308, 258, 217

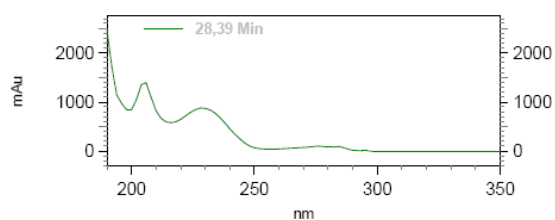

Retention time: 28,392 Min  
Peak name: Peak @ 28,392 Minutes  
Lambda max: 203, 229, 278  
Lambda min: 307, 258, 217

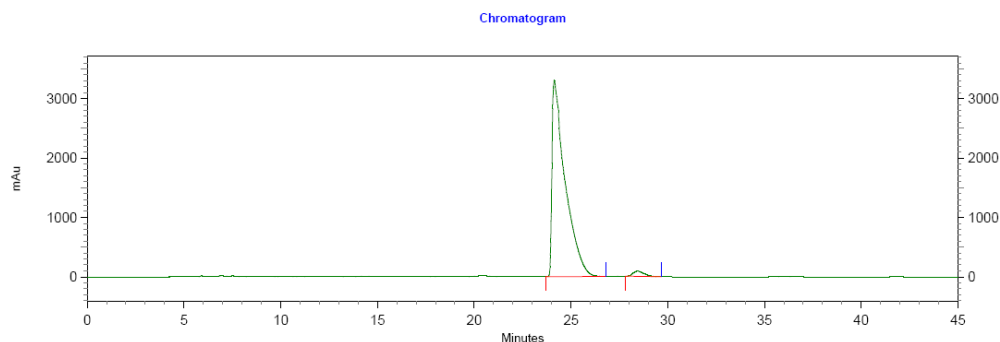

1: 210  
nm, 2 nm  
Results

| Pk # | Name                  | Retention Time | Area      | Area Percent |
|------|-----------------------|----------------|-----------|--------------|
| 1    | Peak @ 24,140 Minutes | 24,140         | 155827537 | 97,747       |
| 2    | Peak @ 28,444 Minutes | 28,444         | 3592045   | 2,253        |

|        |  |  |           |         |
|--------|--|--|-----------|---------|
| Totals |  |  | 159419582 | 100,000 |
|--------|--|--|-----------|---------|

**(R)-4-ethyl-6,7-dimethoxychroman-2-one (4e)**

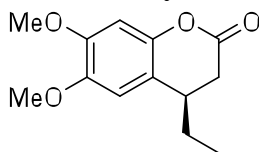

**4e**

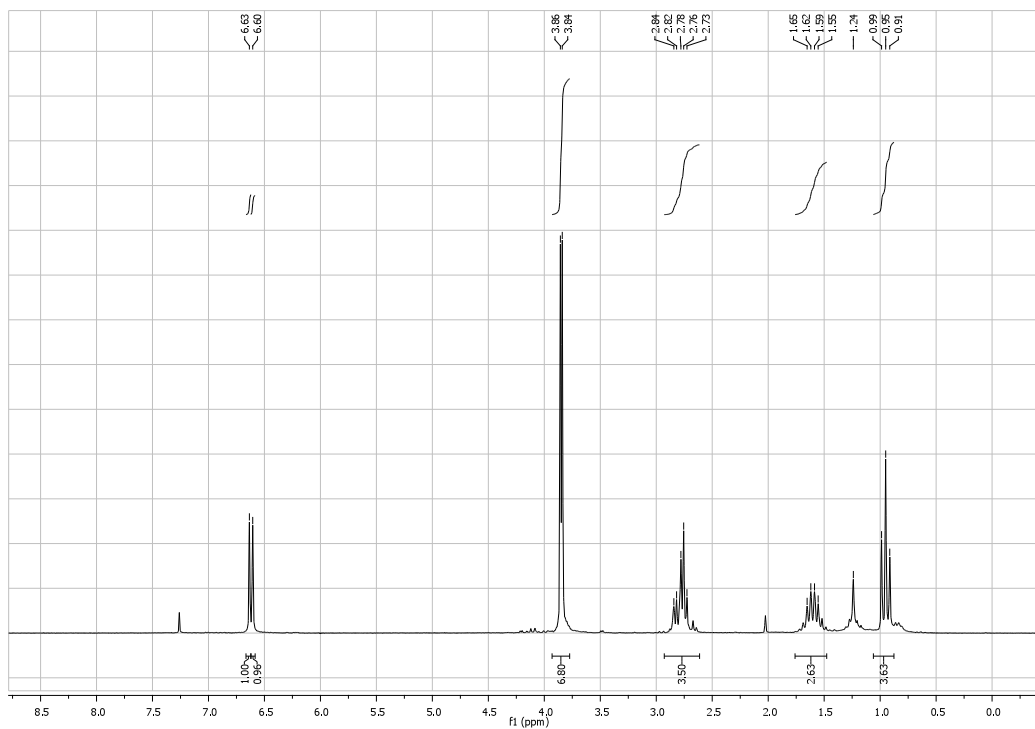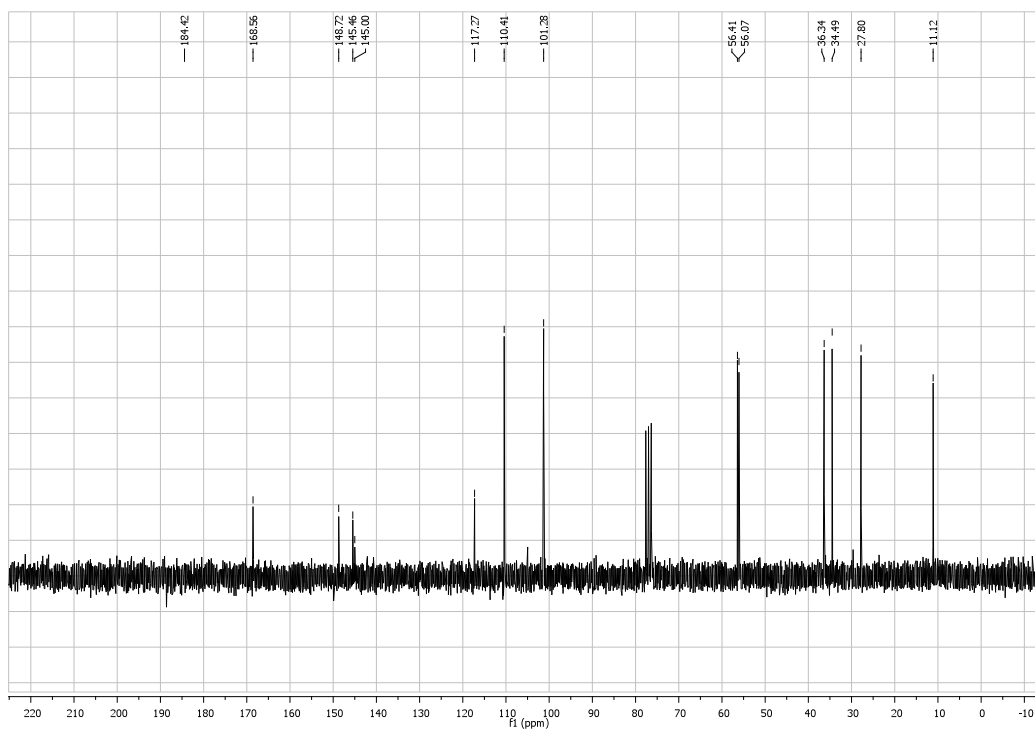



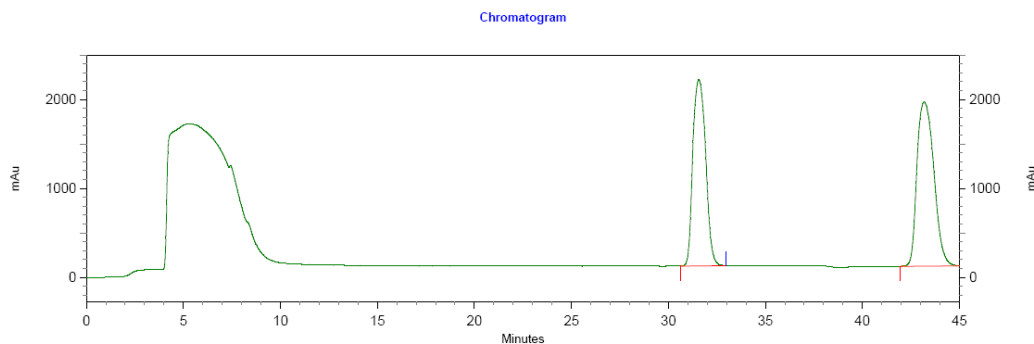

1: 210  
nm, 2 nm  
Results

| Pk #   | Name                  | Retention Time | Area      | Area Percent |
|--------|-----------------------|----------------|-----------|--------------|
| 1      | Peak @ 31,580 Minutes | 31,580         | 96508099  | 46,372       |
| 2      | Peak @ 43,188 Minutes | 43,188         | 111608377 | 53,628       |
| Totals |                       |                | 208116476 | 100,000      |

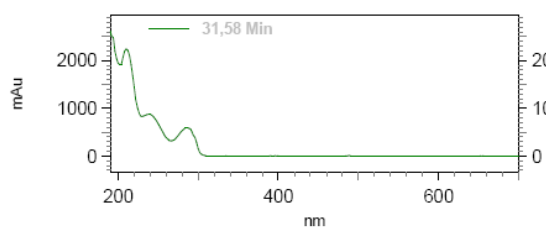

Retention time: 31,580 Min  
Peak name: Peak @ 31,580 Minutes  
Lambda max: 209, 237, 285  
Lambda min: 654, 353, 359

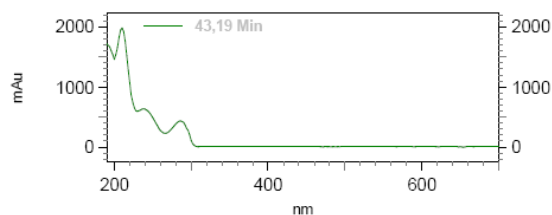

Retention time: 43,188 Min  
Peak name: Peak @ 43,188 Minutes  
Lambda max: 209, 237, 285  
Lambda min: 654, 349, 379

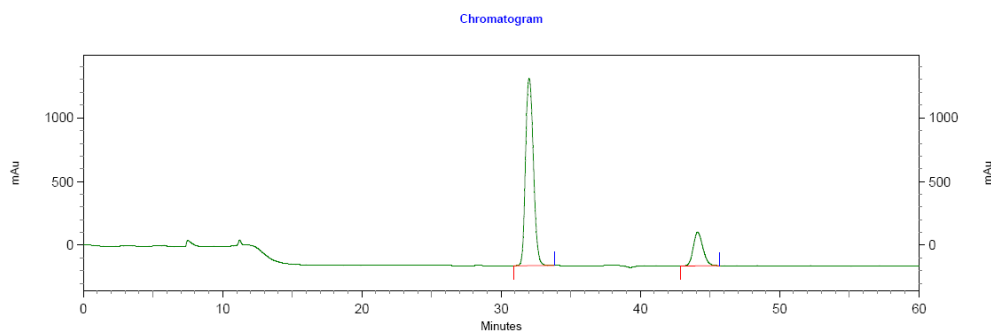

1: 210  
nm, 2 nm  
Results

| Pk #   | Name                  | Retention Time | Area     | Area Percent |
|--------|-----------------------|----------------|----------|--------------|
| 1      | Peak @ 32,008 Minutes | 32,008         | 57728692 | 81,879       |
| 2      | Peak @ 44,112 Minutes | 44,112         | 12775857 | 18,121       |
| Totals |                       |                | 70504549 | 100,000      |

**(R)-4-ethyl-5,7-dimethoxychroman-2-one (4f)**

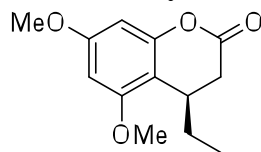

**4f**

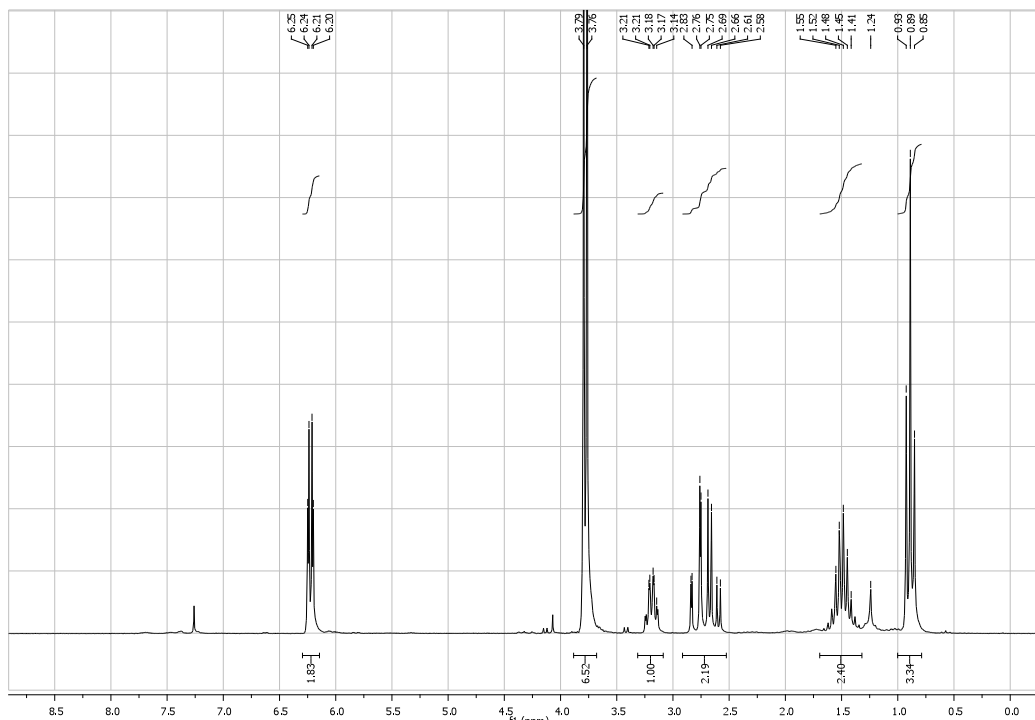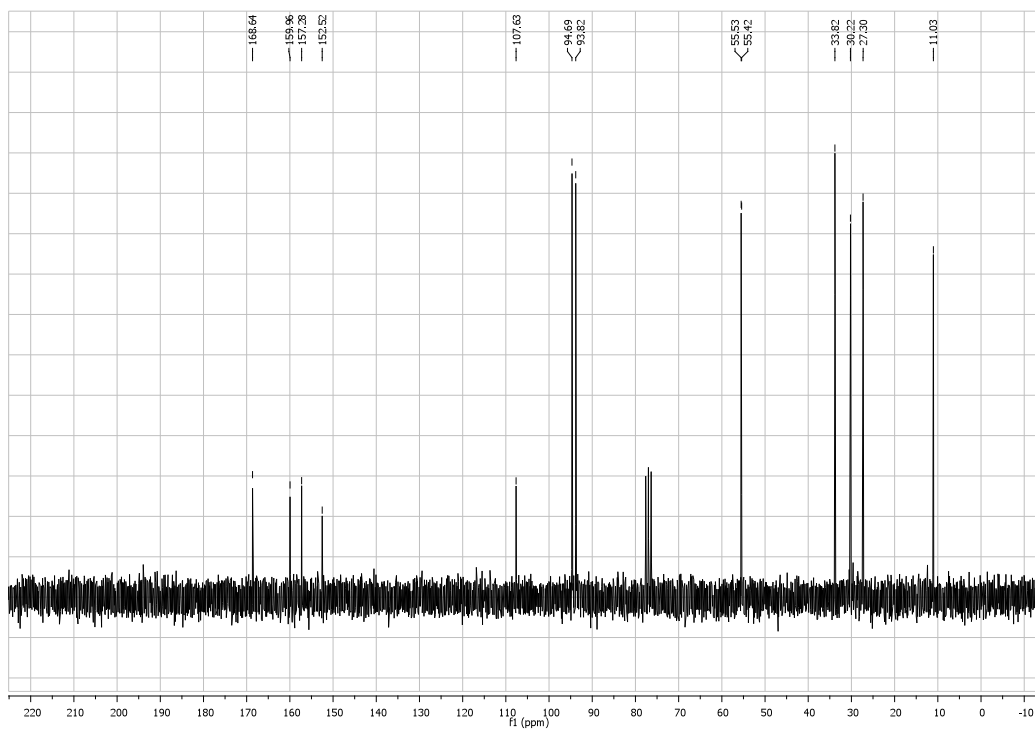

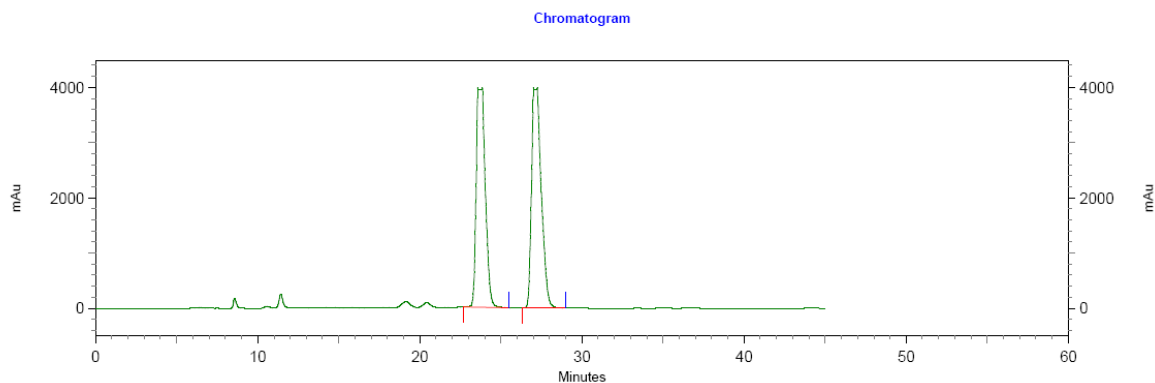

1: 210  
nm, 2 nm  
Results

| Pk #   | Name                  | Retention Time | Area      | Area Percent |
|--------|-----------------------|----------------|-----------|--------------|
| 1      | Peak @ 23,568 Minutes | 23,568         | 154537832 | 48,275       |
| 2      | Peak @ 27,008 Minutes | 27,008         | 165581498 | 51,725       |
| Totals |                       |                | 320119330 | 100,000      |

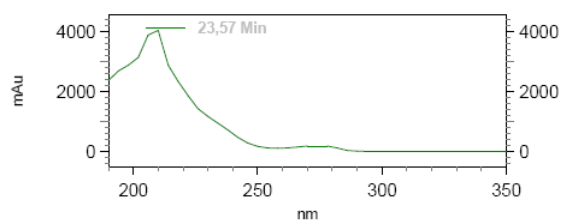

Retention time: 23,568 Min  
Peak name: Peak @ 23,568 Minutes  
Lambda max: 205, 268, 324  
Lambda min: 313, 265

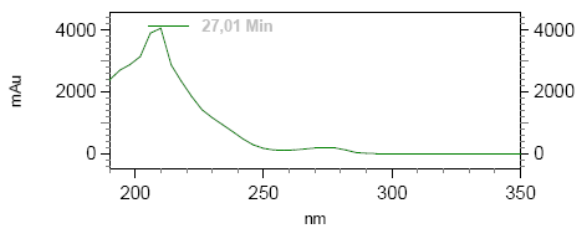

Retention time: 27,008 Min  
Peak name: Peak @ 27,008 Minutes  
Lambda max: 205, 268, 326  
Lambda min: 312, 265

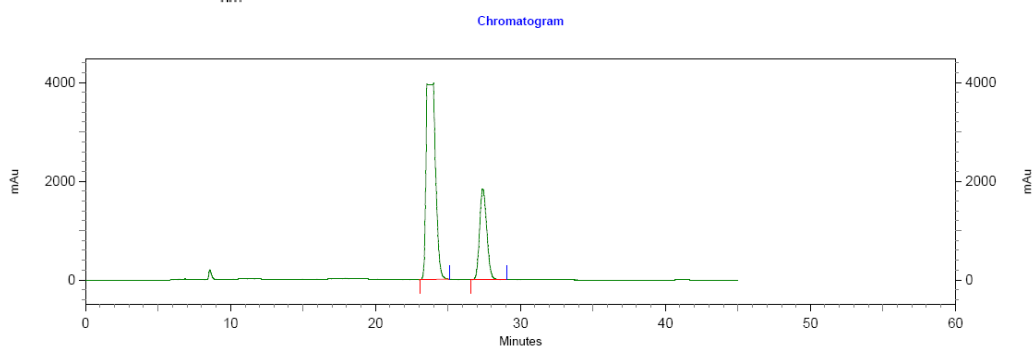

1: 210  
nm, 2 nm  
Results

| Pk #   | Name                  | Retention Time | Area      | Area Percent |
|--------|-----------------------|----------------|-----------|--------------|
| 1      | Peak @ 24,004 Minutes | 24,004         | 179332368 | 74,004       |
| 2      | Peak @ 27,408 Minutes | 27,408         | 62996163  | 25,996       |
| Totals |                       |                | 242328531 | 100,000      |

**(R)-ethyl 3-(2-hydroxyphenyl)pentanoate (6)**

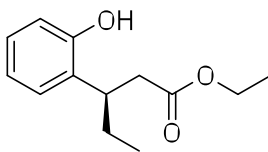

**6**

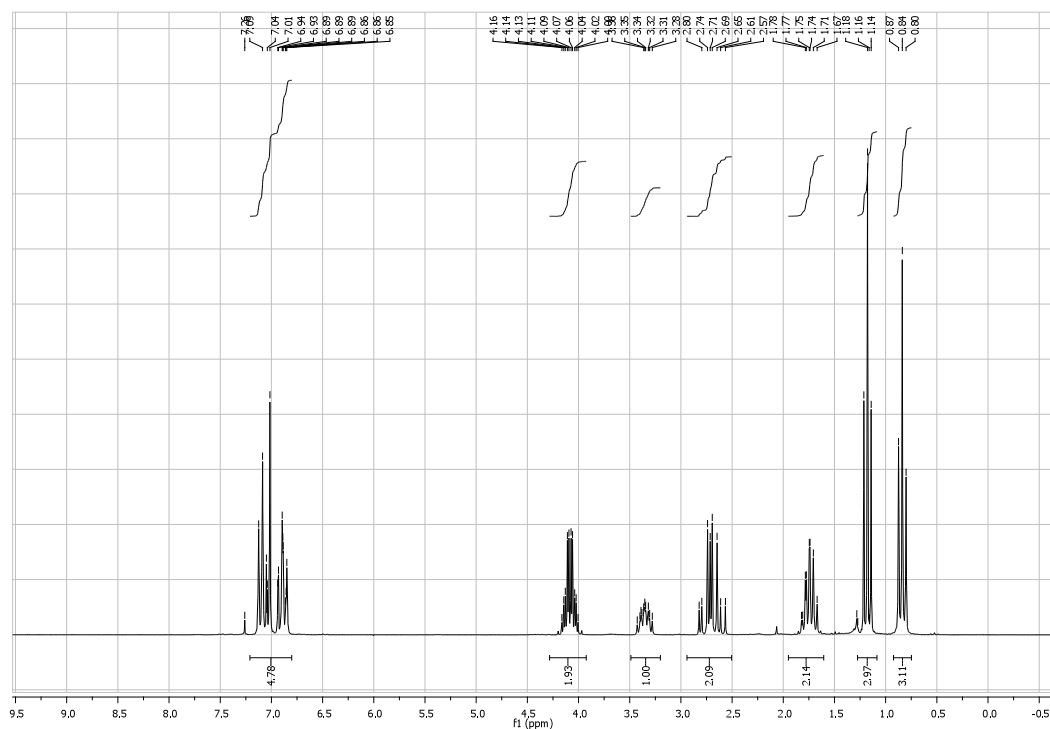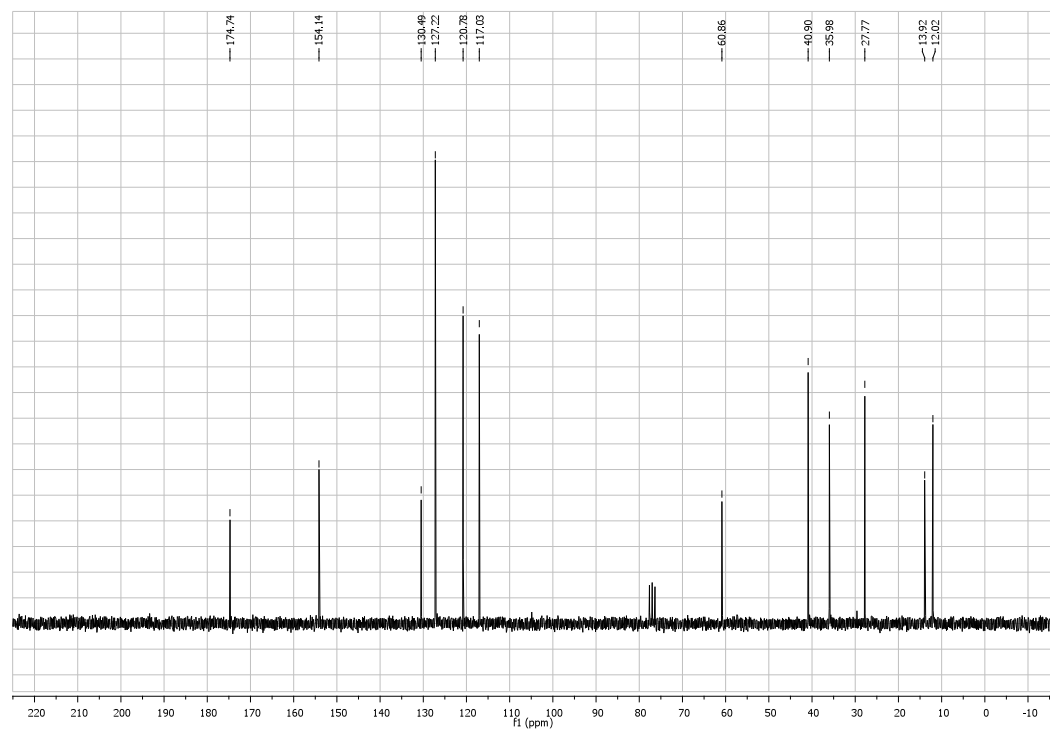

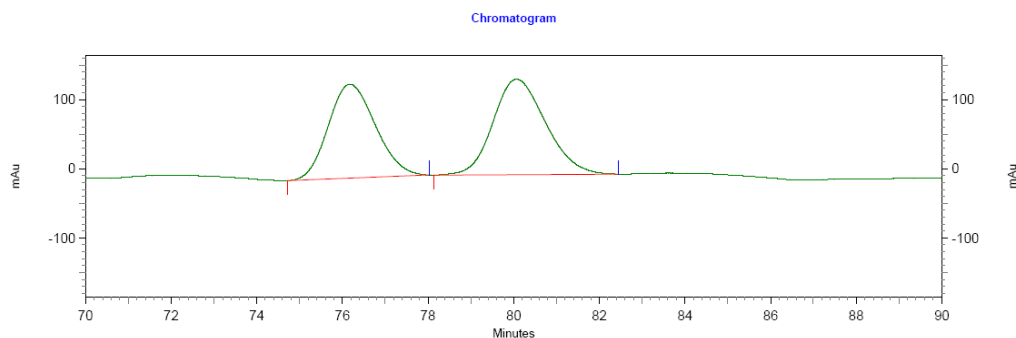

1: 210  
nm, 2 nm  
Results

| Pk #   | Name                  | Retention Time | Area     | Area Percent |
|--------|-----------------------|----------------|----------|--------------|
| 1      | Peak @ 76,180 Minutes | 76,180         | 10354685 | 46,807       |
| 2      | Peak @ 80,064 Minutes | 80,064         | 11767576 | 53,193       |
| Totals |                       |                | 22122261 | 100,000      |

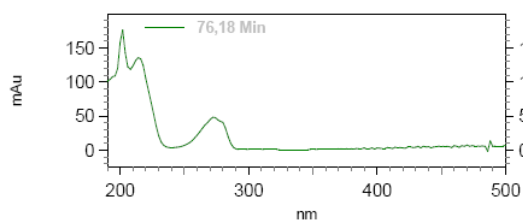

Retention time: 76,180 Min  
Peak name: Peak @ 76,180 Minutes  
Lambda max: 203, 273, 473  
Lambda min: 335, 298, 242

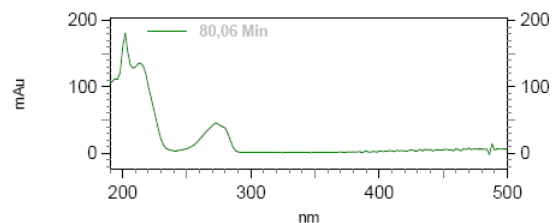

Retention time: 80,064 Min  
Peak name: Peak @ 80,064 Minutes  
Lambda max: 204, 273, 473  
Lambda min: 335, 298, 242

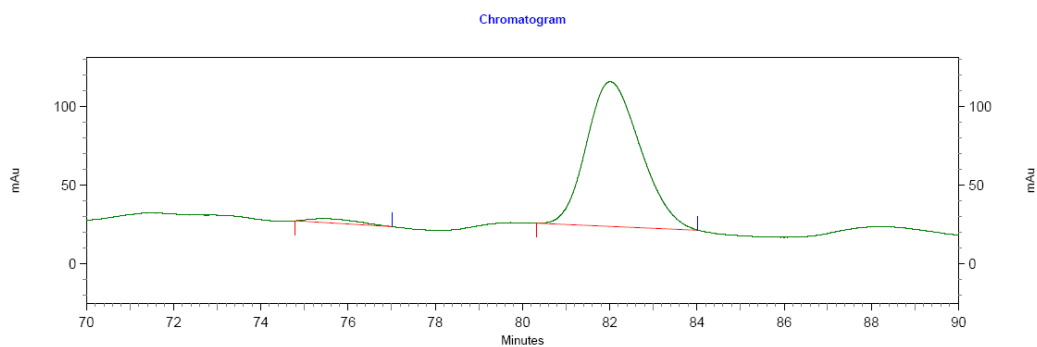

1: 210  
nm, 2 nm  
Results

| Pk #   | Name                  | Retention Time | Area    | Area Percent |
|--------|-----------------------|----------------|---------|--------------|
| 1      | Peak @ 75,384 Minutes | 75,384         | 210098  | 2,586        |
| 2      | Peak @ 82,012 Minutes | 82,012         | 7913271 | 97,414       |
| Totals |                       |                | 8123369 | 100,000      |

**(R)-3-(2-hydroxyphenyl)-N-propylpentanamide (7)**

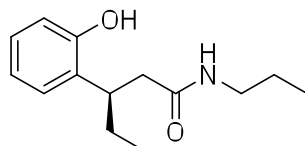

**7**

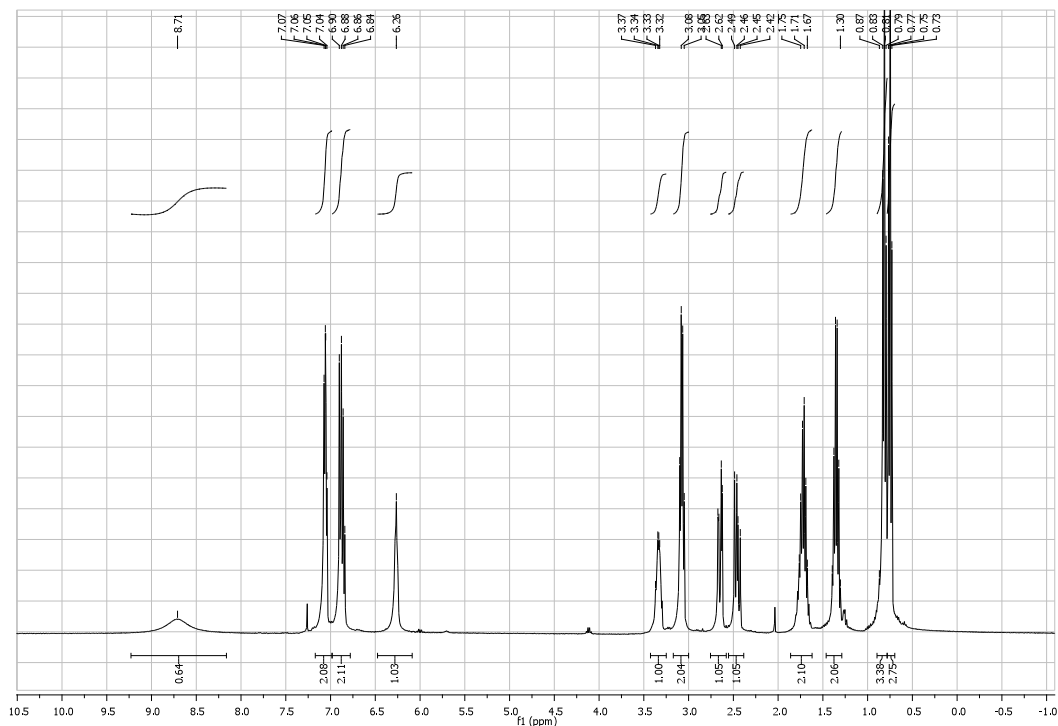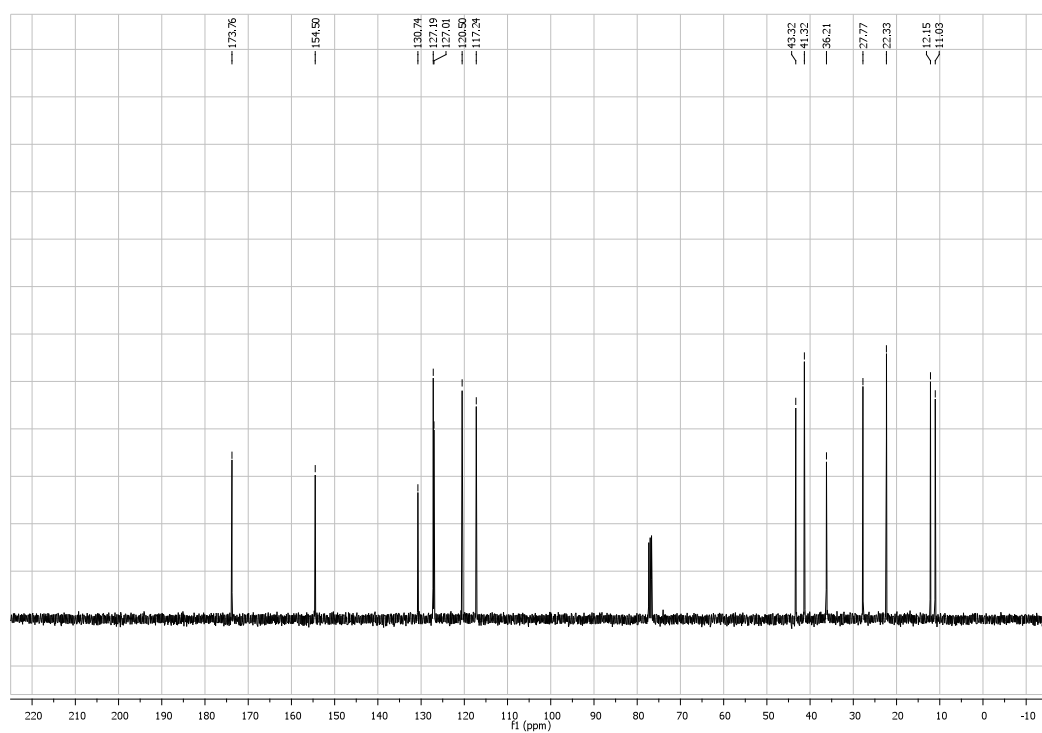

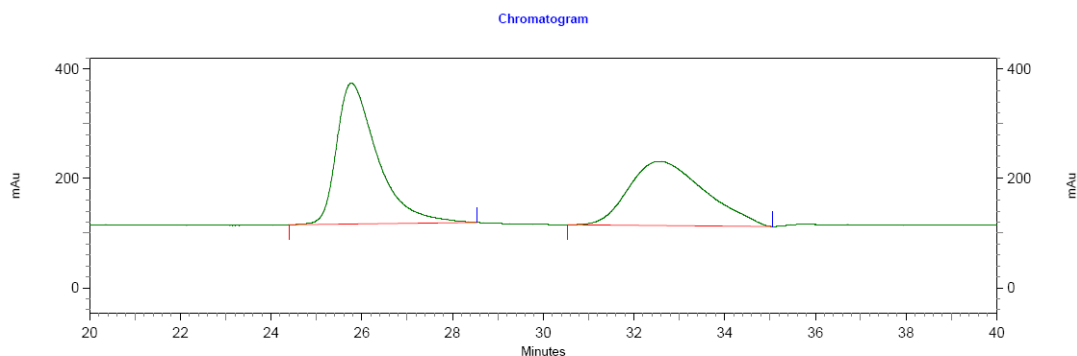

1: 210  
nm, 2 nm  
Results

| Pk #   | Name                  | Retention Time | Area     | Area Percent |
|--------|-----------------------|----------------|----------|--------------|
| 1      | Peak @ 25,768 Minutes | 25,768         | 16110388 | 54,200       |
| 2      | Peak @ 32,564 Minutes | 32,564         | 13613462 | 45,800       |
| Totals |                       |                | 29723850 | 100,000      |

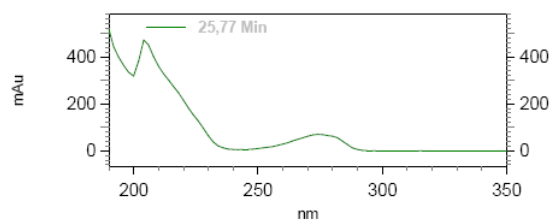

Retention time: 25,768 Min  
Peak name: Peak @ 25,768 Minutes  
Lambda max: 205, 275, 326  
Lambda min: 305, 348, 244

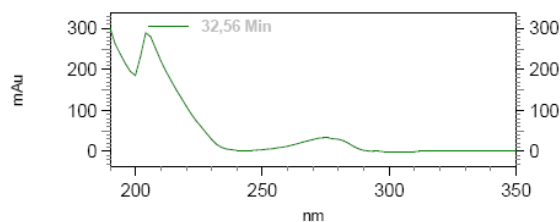

Retention time: 32,564 Min  
Peak name: Peak @ 32,564 Minutes  
Lambda max: 205, 275, 339  
Lambda min: 304, 342, 244

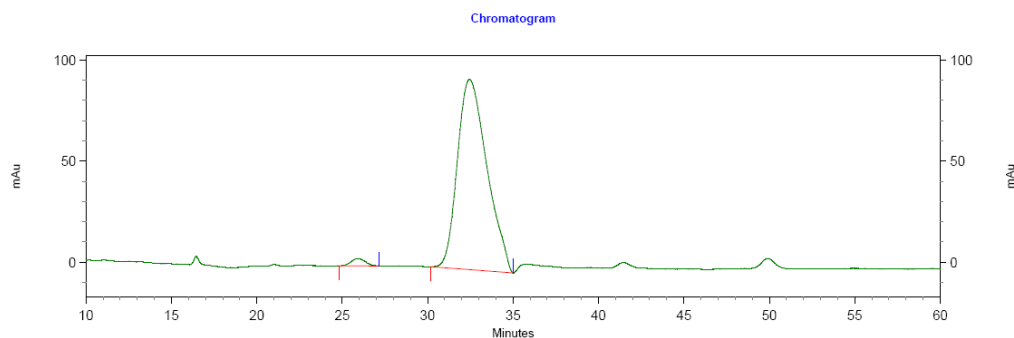

1: 210  
nm, 2 nm  
Results

| Pk #   | Name                  | Retention Time | Area     | Area Percent |
|--------|-----------------------|----------------|----------|--------------|
| 1      | Peak @ 25,924 Minutes | 25,924         | 213761   | 1,860        |
| 2      | Peak @ 32,448 Minutes | 32,448         | 11280307 | 98,140       |
| Totals |                       |                | 11494068 | 100,000      |

**(3S,4R)-4-ethyl-3-(hydroxy(phenyl)methyl)chroman-2-one (8)**

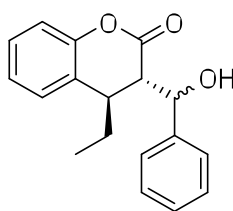

**8**

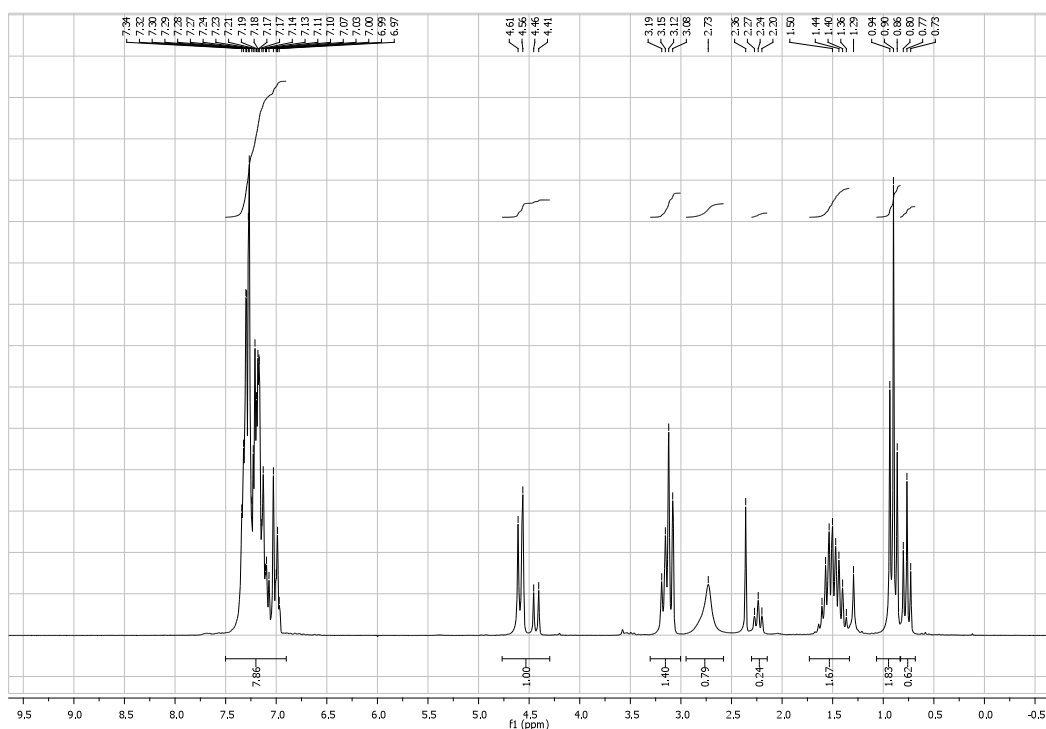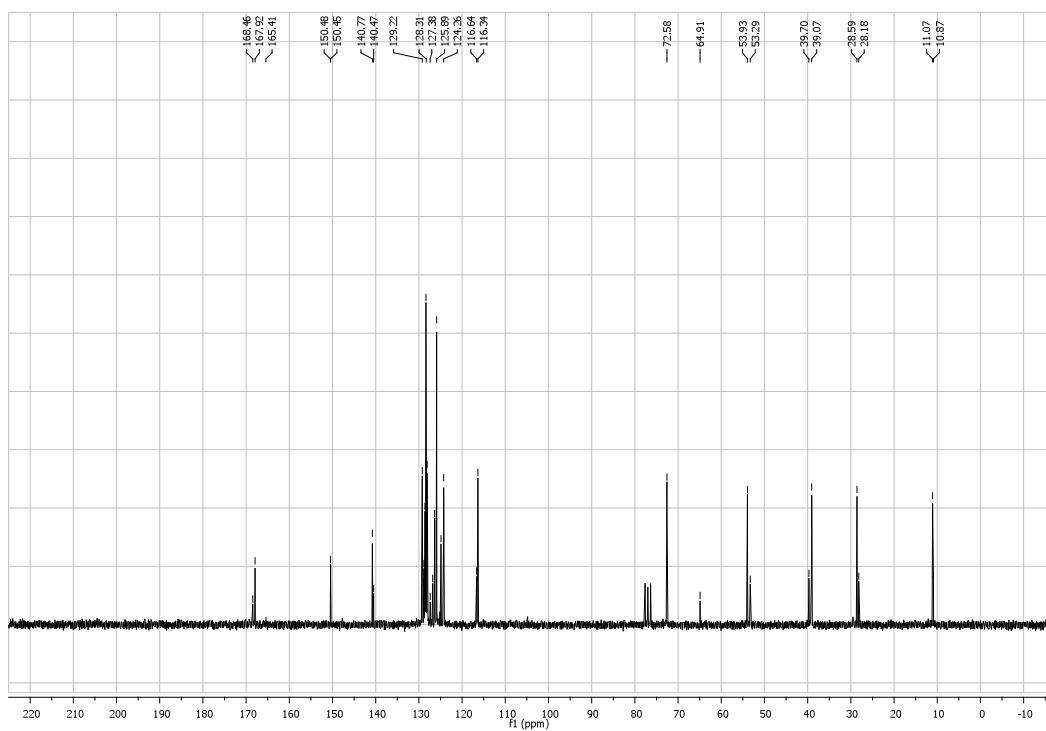

Supplement: c0cc05160h.pdf [file c0cc05160h.pdf]
